# Supplementary material for: Ag(i)-Catalyzed solvent-free CO2 capture with homopropargylic amines: an efficient access to 1,3-oxazinan-2-ones
Source: Royal Society of Chemistry journal article supplement (doi:10.1039/c8qo00978c), 2018-01-01
Supplement: c8qo00978c1.pdf [file c8qo00978c1.pdf]

## *Supporting Information*

|                                                                                                                    |                |
|--------------------------------------------------------------------------------------------------------------------|----------------|
| <b>1. General Information.....</b>                                                                                 | <b>S1</b>      |
| <b>2. Synthesis and characterization of the homopropargylic amines 1a-1m and N-benzylpent-4-yn-1-amine 1q.....</b> | <b>S2-S8</b>   |
| <b>3. Synthesis and characterization of the 1n .....</b>                                                           | <b>S8-S9</b>   |
| <b>4. Synthesis and characterization of the 1o.....</b>                                                            | <b>S9-S11</b>  |
| <b>5. Synthesis and characterization of 2 .....</b>                                                                | <b>S11-S18</b> |
| <b>6. The transformation of the 1, 3-oxazin-2-ones 2a .....</b>                                                    | <b>S18-S20</b> |
| <b>7. The spectra of homopropargylic amines 1.....</b>                                                             | <b>S21-S36</b> |
| <b>8. The spectra of 1,3-oxazinan-2-ones 2.....</b>                                                                | <b>S37-S51</b> |
| <b>9. The spectra of other compounds 3a, 4a, 5a .....</b>                                                          | <b>S52-S54</b> |
| <b>10. Reference.....</b>                                                                                          | <b>S55</b>     |

### **1. General Information**

The  $^1\text{H}$  NMR and  $^{13}\text{C}$  NMR spectra were recorded at Bruker AV 400 MHz.  $^1\text{H}$  and  $^{13}\text{C}$  NMR Chemical shifts were calibrated to tetramethylsilane as an internal reference. The data of the NMR spectra ( $^1\text{H}$  NMR,  $^{13}\text{C}$  NMR and  $^{19}\text{F}$  NMR) were recorded at 293 K on a Bruker AVANCE AV 400 (400MHz, 101MHz and 376MHz). Chemical shifts are given in (ppm) and coupling constants ( $J$ ) in Hz. The following abbreviations are used to indicate the multiplicity: s, singlet; d, doublet; t, triplet; q, quartet; m, multiplet; Infrared spectra were recorded on an Bruker Fourier transform spectrometer (FT-IR) and are reported in wave numbers. High resolution mass spectrometric (HRMS) analyses spectrum was determined on the Varian 7.0T FTMS instrument.

## 2. Synthesis and characterization of the homopropargylamines 1a-1m and *N*-benzylpent-4-yn-1-amine 1q

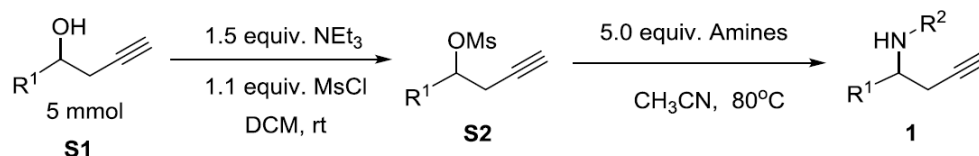

The **S1** (5.0 mmol) was dissolved in DCM (5.0 mL) in reaction tube, then the MsCl (0.92 g, 5.5 mmol, 1.1 equiv.) and Et<sub>3</sub>N (0.76 g, 0.75 mmol, 1.5 equiv.) were added to the tube. The resulting mixture was stirred for 0.5 h at room temperature. After completion, the mixture was quenched with distilled water and extracted with CH<sub>2</sub>Cl<sub>2</sub> (3 × 20 mL). The combined organic layer was washed with brine, dried over MgSO<sub>4</sub>, and concentrated in vacuo. The obtained crude product **S2** was used directly for the next reaction.

To a Schlenk tube was sequentially added **S2**, amines (25 mmol, 5.0 equiv.) and CH<sub>3</sub>CN (5 mL), the reaction mixture was stirred for overnight at 80 °C. After completion, the reaction mixture was quenched with water and extracted with CH<sub>2</sub>Cl<sub>2</sub> (3 × 20 mL). The combined organic layer was washed with brine, dried over MgSO<sub>4</sub>, and concentrated in vacuo. The residue was purified by flash chromatography on silica gel (gradient elution of EtOAc /petroleum ether, PE : EA = 15 : 1) to give the homopropargylic amines **1**.

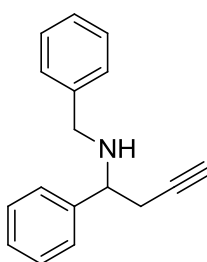

### *N*-benzyl-1-phenylbut-3-yn-1-amine (**1a**)

Yellow liquid, 530 mg, yield 45%, <sup>1</sup>H NMR (400 MHz, Chloroform-d) δ 7.41 – 7.23 (m, 10 H), 3.88 – 3.85 (t, *J* = 6.8 Hz, 1H), 3.73 – 3.69 (d, *J* = 13.2 Hz, 1H), 3.60 – 3.56 (d, *J* = 13.2 Hz, 1H), 2.56 – 2.53 (m, 2H), 2.02-1.97 (t, *J* = 2.4 Hz, 2H). <sup>13</sup>C NMR (101 MHz, CDCl<sub>3</sub>) δ 142.5, 140.3, 128.5, 128.4, 128.1, 127.6, 127.2, 127.0, 81.6, 70.6, 60.7, 51.4, 28.3.<sup>[1]</sup>

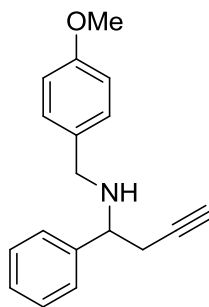

***N*-(4-methoxybenzyl)-1-phenylbut-3-yn-1-amine (1b)**

Pale yellow oil, 463 mg, yield 35%,  $^1\text{H}$  NMR (400 MHz, Chloroform-*d*)  $\delta$  7.40 – 7.33 (m, 4H), 7.30 – 7.26 (m, 1H), 7.21 – 7.29 (d,  $J$  = 8.4 Hz, 2H), 6.86 – 6.84 (d,  $J$  = 8.4 Hz, 2H), 3.86 – 3.83 (t,  $J$  = 6.8 Hz, 1H), 3.79 (s, 3H), 3.65 – 3.62 (d,  $J$  = 12.8 Hz, 1H), 3.53 – 3.49 (d,  $J$  = 13.2 Hz, 1H), 2.54 – 2.52 (m, 2H), 2.01–2.00 (t,  $J$  = 2.4 Hz, 2H).  $^{13}\text{C}$  NMR (101 MHz,  $\text{CDCl}_3$ )  $\delta$  158.6, 142.5, 132.4, 129.3, 128.5, 127.6, 127.2, 113.8, 81.6, 70.5, 60.6, 55.3, 50.8, 28.2. <sup>[2]</sup>

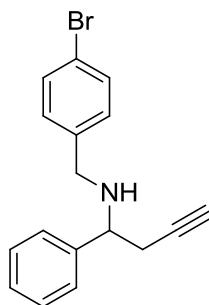

***N*-(4-bromobenzyl)-1-phenylbut-3-yn-1-amine (1c)**

Yellow liquid, 313 mg, yield 20%,  $^1\text{H}$  NMR (400 MHz, Chloroform-*d*)  $\delta$  7.44 – 7.42 (d,  $J$  = 7.6 Hz, 2H), 7.37 – 7.33 (m, 4 H), 7.30 – 7.29 (d,  $J$  = 5.6 Hz, 1H), 7.18 – 7.16 (d,  $J$  = 7.6 Hz, 2H), 3.84 – 3.81 (t,  $J$  = 6.8 Hz, 1H), 3.66 – 3.63 (d,  $J$  = 13.6 Hz, 1H), 3.54 – 3.51 (d,  $J$  = 13.6 Hz, 1H), 2.54 – 2.52 (m, 2H), 2.03 (s, 2H).  $^{13}\text{C}$  NMR (101 MHz,  $\text{CDCl}_3$ )  $\delta$  142.2, 139.3, 131.4, 129.8, 128.6, 127.7, 127.1, 12.7, 81.5, 70.6, 60.6, 50.7, 28.2. HRMS ( $\text{ESI}^+$ ) calculated for  $\text{C}_{17}\text{H}_{17}\text{BrN}$  ( $\text{M}+\text{H}^+$ ) 314.0544; found 314.0544.

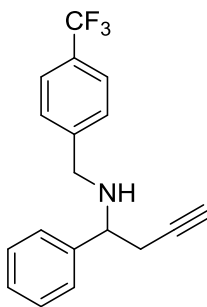

**1-phenyl-N-(4-(trifluoromethyl)benzyl)but-3-yn-1-amine (1d)**

Yellow liquid, 91 mg, yield 15%,  $^1\text{H}$  NMR (400 MHz, Chloroform-*d*)  $\delta$  7.57 – 7.55 (d,  $J$  = 8.4 Hz, 2H), 7.42 -7.34 (m, 6H), 7.31 – 7.27 (m, 1H), 3.86 – 3.83 (t,  $J$  = 6.0 Hz, 1H), 3.77 – 3.73 (d,  $J$  = 14.0 Hz, 1H), 3.66 – 3.63 (d,  $J$  = 15 Hz, 1H), 2.61 – 2.49 (m, 2H), 2.04 - 2.03 (t,  $J$  = 2.8 Hz, 2H).  $^{13}\text{C}$  NMR (101 MHz,  $\text{CDCl}_3$ )  $\delta$  144.4, 142.1, 129.4, 129.1, 128.6, 128.3, 127.7, 127.1, 125.6, 125.4, 125.3, 125.28, 125.2, 81.4, 70.7, 60.7, 50.8, 28.2.  $^{19}\text{F}$  NMR (376 MHz,  $\text{CDCl}_3$ )  $\delta$  -62.2. HRMS ( $\text{ESI}^+$ ) calculated for  $\text{C}_{18}\text{H}_{17}\text{F}_3\text{N}$  ( $\text{M}+\text{H}^+$ ) 304.1313; found 304.1313.

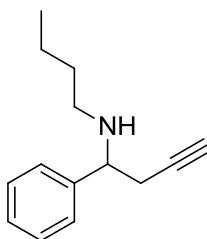

**N-butyl-1-phenylbut-3-yn-1-amine (1e)**

Yellow liquid, 201 mg, yield 20%,  $^1\text{H}$  NMR (400 MHz, Chloroform-*d*)  $\delta$  7.37 – 7.24 (m, 5H), 3.83 – 3.79 (q,  $J$  = 6.8 Hz, 1H), 2.58 – 2.39 (m, 4H), 2.03-2.02 (t,  $J$  = 2.1 Hz, 1H), 1.75 (s, 1H), 1.49 – 1.42 (m, 2H), 1.38 – 1.23 (m, 2H), 0.90 – 0.86 (t,  $J$  = 7.6 Hz, 3H).  $^{13}\text{C}$  NMR (101 MHz,  $\text{CDCl}_3$ )  $\delta$  142.9, 128.4, 127.4, 127.0, 81.7, 70.4, 61.7, 47.4, 32.2, 28.1, 20.4, 14.0. HRMS ( $\text{ESI}^+$ ) calculated for  $\text{C}_{14}\text{H}_{20}\text{N}$  ( $\text{M}+\text{H}^+$ ) 202.1596; found 202.1593.

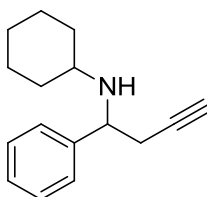

**N-(1-phenylbut-3-yn-1-yl)cyclohexanamine (1f)**

Yellow liquid, 283 mg, yield 25%,  $^1\text{H}$  NMR (400 MHz, Chloroform-*d*)  $\delta$  7.36 – 7.31

(q,  $J = 7.6$  Hz, 4H), 7.28 – 7.24 (t,  $J = 7.2$  Hz, 1H), 4.02 – 3.99 (t,  $J = 6.4$  Hz, 1H), 2.56 – 2.44 (m, 2H), 2.32 – 2.26 (m, 1H), 2.01 – 1.96 (t, 2H), 1.74 – 1.54 (m, 5H), 1.15 – 0.99 (m, 5H).  $^{13}\text{C}$  NMR (101 MHz,  $\text{CDCl}_3$ )  $\delta$  143.4, 128.4, 127.3, 127.0, 81.7, 70.4, 58.1, 53.4, 34.6, 32.9, 28.6, 26.2, 25.2, 24.9. HRMS ( $\text{ESI}^+$ ) calculated for  $\text{C}_{16}\text{H}_{22}\text{N}$  ( $\text{M}+\text{H}^+$ ) 228.1752; found 228.1750.

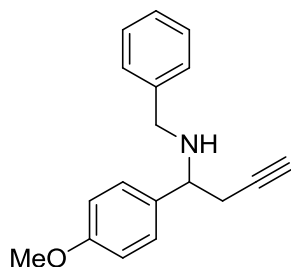

***N*-benzyl-1-(4-methoxyphenyl)but-3-yn-1-amine (1g)**

Yellow liquid, 132 mg, yield 10%,  $^1\text{H}$  NMR (400 MHz,  $\text{Chloroform-}d$ ) 7.34 – 7.23 (m, 7H), 6.91 – 6.89 (d,  $J = 8.4$  Hz, 2H), 3.84 – 3.81 (d, 4H), 3.72 – 3.68 (d,  $J = 13.2$  Hz, 1H), 3.58 – 3.55 (d,  $J = 13.2$  Hz, 1H), 2.53 – 2.51 (q,  $J = 2.4$  Hz, 2H), 2.02 – 2.01 (t,  $J = 2.4$  Hz, 1H), 1.97 (s, 1H).  $^{13}\text{C}$  NMR (101 MHz,  $\text{CDCl}_3$ )  $\delta$  159.0, 140.2, 134.3, 128.4, 128.3, 128.1, 126.9, 113.9, 81.7, 70.5, 60.1, 55.3, 51.3, 28.3. HRMS ( $\text{ESI}^+$ ) calculated for  $\text{C}_{18}\text{H}_{19}\text{NO}$  ( $\text{M}+\text{H}^+$ ) 266.1545; found 266.1543.

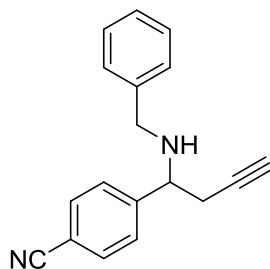

**4-(1-(benzylamino)but-3-yn-1-yl)benzonitrile (1h)**

Yellow liquid, 81 mg, yield 6%,  $^1\text{H}$  NMR (400 MHz,  $\text{Chloroform-}d$ )  $\delta$  7.66 – 7.64 (d,  $J = 8.0$  Hz, 2H), 7.54 – 7.52 (d,  $J = 8.0$  Hz, 2H), 7.34 – 7.26 (m, 5H), 3.93 – 3.90 (t,  $J = 6.4$  Hz, 1H), 3.69 – 3.66 (d,  $J = 13.2$  Hz, 1H), 3.58 – 3.55 (d,  $J = 13.6$  Hz, 1H), 2.58 – 2.46 (m, 2H), 2.04 – 2.03 (t,  $J = 2.8$  Hz, 2H).  $^{13}\text{C}$  NMR (101 MHz,  $\text{CDCl}_3$ )  $\delta$  148.0, 139.6, 132.4, 128.5, 128.1, 128.0, 127.2, 118.9, 111.5, 80.4, 71.2, 60.4, 51.4, 27.9. HRMS ( $\text{ESI}^+$ ) calculated for  $\text{C}_{18}\text{H}_{17}\text{N}_2$  ( $\text{M}+\text{H}^+$ ) 261.1392; found 261.1391.

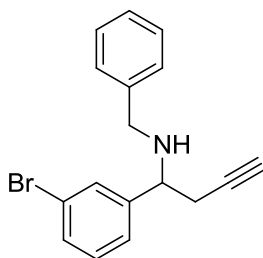

***N*-benzyl-1-(3-bromophenyl)but-3-yn-1-amine (1i)**

Yellow liquid, 156 mg, yield 10 %,  $^1\text{H}$  NMR (400 MHz, Chloroform-*d*)  $\delta$  7.56 (s, 1H), 7.40 – 7.39 (d,  $J$  = 7.6 Hz, 1H), 7.33 – 7.17 (m, 7H ), 3.82 – 3.79 (t,  $J$  = 6.8 Hz, 1H), 3.70 – 3.67 (d,  $J$  = 13.2 Hz, 1H), 3.57 – 3.53 (d,  $J$  = 13.2 Hz, 1H), 2.50 – 2.47 (m, 2H), 2.05 (s, 1H), 2.02 – 2.01 (t,  $J$  = 2.4 Hz, 1H).  $^{13}\text{C}$  NMR (101 MHz,  $\text{CDCl}_3$ )  $\delta$  145.1, 140.0, 130.8, 130.3, 130.2, 128.5, 128.1, 127.1, 126.0, 122.8, 81.1, 71.0, 60.3, 51.5, 28.2. HRMS ( $\text{ESI}^+$ ) calculated for  $\text{C}_{17}\text{H}_{17}\text{BrN}$  ( $\text{M}+\text{H}^+$ ) 314.0544; found 314.0543.

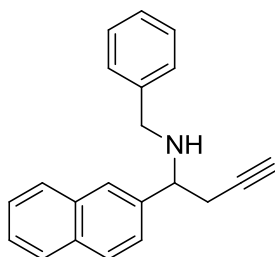

***N*-benzyl-1-(naphthalen-2-yl)but-3-yn-1-amine (1j)**

Yellow liquid, 783 mg, yield 55%,  $^1\text{H}$  NMR (400 MHz, Chloroform-*d*)  $\delta$  8.16 – 8.14 (d,  $J$  = 8 Hz, 1H), 7.86 – 7.75 (m, 3H), 7.50 – 7.44 (m, 3H), 7.29 – 7.21 (m, 5H), 4.74 – 4.71 (q,  $J$  = 4.4 Hz, 1H), 3.79 – 3.75 (d,  $J$  = 13.6 Hz, 1H), 3.64 – 3.61 (d,  $J$  = 13.2 Hz, 1H), 2.78 – 2.72 (m, 1H), 2.64 – 2.57 (m, 1H), 2.19 (s, 1H), 2.04 – 2.02 (t,  $J$  = 2.8 Hz, 1H).  $^{13}\text{C}$  NMR (101 MHz,  $\text{CDCl}_3$ )  $\delta$  140.5, 137.7, 134.1, 131.6, 129.2, 128.5, 128.3, 128.0, 127.1, 126.1, 125.8, 125.6, 124.1, 122.9, 81.9, 71.0, 56.6, 51.7, 27.4. HRMS ( $\text{ESI}^+$ ) calculated for  $\text{C}_{21}\text{H}_{19}\text{N}$  ( $\text{M}+\text{H}^+$ ) 286.1596; found 286.1593.

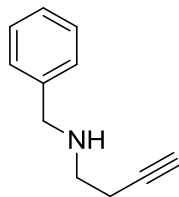

***N*-benzylbut-3-yn-1-amine (1k)**

Colorless liquid, 318 mg, yield 40%,  $^1\text{H}$  NMR (400 MHz, Chloroform-*d*)  $\delta$  7.37 –

7.30 (m, 4H), 7.28 – 7.23 (m, 1H), 3.82 (s, 2H), 2.82 – 2.79 (t,  $J = 6.8$  Hz, 2H), 2.44 – 2.40 (m, 2H), 2.00 – 1.99 (t,  $J = 2.8$  Hz, 1H), 1.66 (s, 1H).  $^{13}\text{C}$  NMR (101 MHz,  $\text{CDCl}_3$ )  $\delta$  140.1, 128.4, 128.1, 127.0, 82.5, 69.6, 53.4, 47.3, 19.6. <sup>[3]</sup>

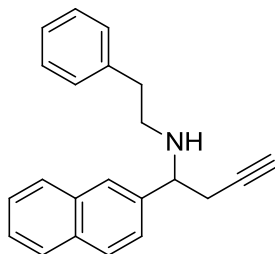

**1-(naphthalen-2-yl)-N-phenethylbut-3-yn-1-amine (1l)**

Brown liquid, 747 mg, yield 50%,  $^1\text{H}$  NMR (400 MHz, Chloroform-*d*) 8.18 – 8.16 (d,  $J = 8$  Hz, 1H), 7.87 – 7.85 (q,  $J = 2.4, 7.2$  Hz, 1H), 7.76 – 7.74 (d,  $J = 8$  Hz, 1H), 7.63 – 7.61 (d,  $J = 7.2$  Hz, 1H), 7.51 – 7.42 (m, 3H), 7.28 – 7.23 (m, 2H), 7.20 – 7.17 (m, 3H), 4.71 – 4.68 (q,  $J = 4.8$  Hz, 1H), 2.82 (s, 4H), 2.76 – 2.70 (m, 1H), 2.59 – 2.52 (m, 1H), 1.98 – 1.95 (m, 2H).  $^{13}\text{C}$  NMR (101 MHz,  $\text{CDCl}_3$ )  $\delta$  140.0, 137.7, 134.0, 131.4, 129.1, 128.8, 128.4, 127.8, 126.1, 126.0, 125.6, 125.4, 123.8, 122.7, 81.6, 70.8, 57.2, 48.9, 36.5, 27.3. HRMS ( $\text{ESI}^+$ ) calculated for  $\text{C}_{22}\text{H}_{22}\text{N}$  ( $\text{M}+\text{H}^+$ ) 300.1752; found 300.1750.

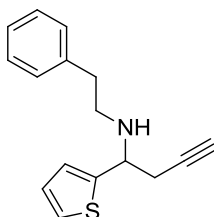

**N-benzyl-1-(thiophen-2-yl)but-3-yn-1-amine (1m)**

Yellow liquid, 255 mg, yield 20%,  $^1\text{H}$  NMR (400 MHz, Chloroform-*d*)  $\delta$  7.26 – 7.24 (t,  $J = 7.2$  Hz, 2H), 7.19 – 7.17 (d,  $J = 6.4$  Hz, 4H), 6.93 – 6.91 (t,  $J = 3.6$  Hz, 2H), 4.14 – 4.11 (t,  $J = 6.4$  Hz, 1H), 2.87 – 2.79 (m, 4H), 2.59 – 2.57 (d,  $J = 6$  Hz, 2H), 1.97 (s, 1H), 1.89 (s, 1H).  $^{13}\text{C}$  NMR (101 MHz,  $\text{CDCl}_3$ )  $\delta$  147.4, 139.9, 128.8, 128.5, 126.5, 126.2, 124.5, 124.4, 80.9, 71.1, 57.2, 48.7, 36.3, 28.6. HRMS ( $\text{ESI}^+$ ) calculated for  $\text{C}_{16}\text{H}_{18}\text{NS}$  ( $\text{M}+\text{H}^+$ ) 256.1160; found 256.1158.

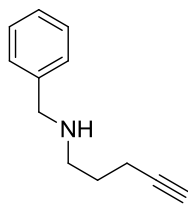

### ***N*-benzylpent-4-yn-1-amine (1q)**

Colorless liquid, 260 mg, yield 30%,  $^1\text{H}$  NMR (400 MHz, Chloroform-*d*) 7.27 – 7.16 (m, 5H), 3.72 (s, 2H), 2.69 – 2.65 (t,  $J = 7.2$  Hz, 2H), 2.22 – 2.17 (m, 2H), 1.88 – 1.86 (t,  $J = 1.8$  Hz, 1H), 1.69 – 1.62 (m, 2H).<sup>[4]</sup>

### **3. Synthesis and characterization of the 1n**

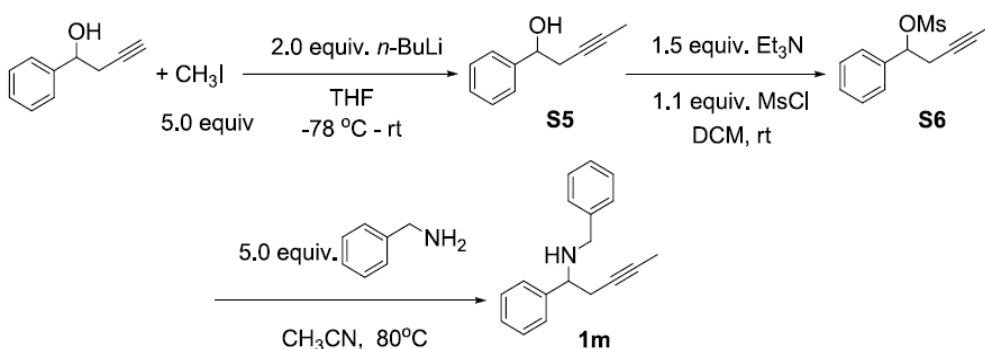

The  $\text{Pd}(\text{PPh}_3)_4$  (110 mg, 0.11 mmol, 1 mol%), CuI (30 mg, 0.22 mmol, 2 mol%), piperidine (2.554 g, 30 mmol), iodobenzene (2.244 g, 11.0 mmol) and DMF (15 mL) were sequentially added to a Schlenk tube, the terminal alkynes (10 mmol) was then added, the reaction mixture is degassed by alternately freezing, evacuating and thawing. After that, the reaction mixture was stirred at 80 °C for 16 h at  $\text{N}_2$  atmosphere and then quenched with saturated NaCl aqueous. The obtained reaction solution was extracted with ethyl acetate ( $3 \times 20$  mL) three times. The combined organic layer was washed with brine, dried over anhydrous  $\text{MgSO}_4$  and filtered. The filtrate was concentrated over vacuo. The crude residue was purified by silica gel column chromatography (petrol ether/EtOAc 10:1) to afford the compound **S3** (1.89 g, yield 85%).<sup>[5]</sup>

The **S3** (1.11 g, 5.0 mmol) was dissolved in DCM (5.0 mL) in reaction tube, then the MsCl (0.92 g, 1.1 equiv.) and  $\text{Et}_3\text{N}$  (0.76 g, 1.5 equiv.) were added to the above tube. The resulting mixture was stirred for 0.5 h at room temperature. After completion, the reaction mixture was quenched with distilled water and extracted with



CH<sub>2</sub>Cl<sub>2</sub> (3 × 20 mL). The combined organic layer was washed with brine, dried over MgSO<sub>4</sub> and filtered. The filtrate was concentrated over vacuo. The resulted residue (crude product **S4**) was used directly for the next reaction.

To a Schlenk tube was added the above residue **S4**, then the benzylamine (2.7 g, 25 mmol, 5.0 equiv.) and CH<sub>3</sub>CN (5 mL) were sequentially added into the Schlenk tube. The reaction mixture was stirred for overnight at 80 °C. After completion, the reaction mixture was directly purified by flash chromatography on silica gel (gradient elution of EtOAc /petroleum ether, PE : EA = 15 : 1) to afford the compound **1n** (544 mg, total yield 35%).

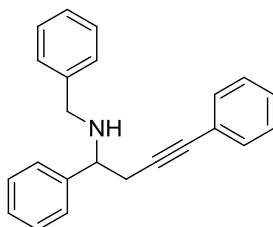

#### **N-benzyl-1,4-diphenylbut-3-yn-1-amine (1n)**

Colorless liquid, 544 mg, yield 35%, <sup>1</sup>H NMR (400 MHz, Chloroform-*d*) 7.45 – 7.43 (d, *J* = 7.6 Hz, 2H), 7.39 – 7.34 (m, 4H), 7.31 – 7.22 (m, 9H), 3.95 – 3.92 (t, *J* = 6.4 Hz, 1H), 3.77 – 3.74 (d, *J* = 13.2 Hz, 1H), 3.62 – 3.58 (d, *J* = 13.2 Hz, 1H), 2.75 – 2.74 (d, *J* = 6.8 Hz, 2H), 2.10 (s, 1H). <sup>13</sup>C NMR (101 MHz, CDCl<sub>3</sub>) δ142.7, 140.4, 131.6, 128.5, 128.4, 128.3, 128.2, 127.9, 127.6, 127.3, 126.9, 123.5, 87.2, 82.7, 61.0, 51.4, 29.4. HRMS (ESI<sup>+</sup>) calculated for C<sub>23</sub>H<sub>22</sub>N (M+H<sup>+</sup>) 312.1752; found 312.1750.

#### **4. Synthesis and characterization of the 1o**

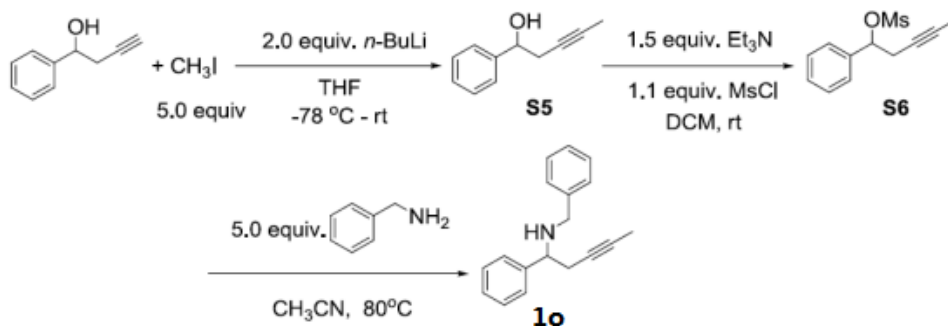

A round-bottomed flask was wrapped in aluminum foil and equipped with a dropping funnel and a thermometer. The flask was charged with

1-phenylbut-3-yn-1-ol (258 mg, 1.5 mmol, 1.0 equiv.) and tetrahydrofuran (4 mL). The resulting solution was cooled to -78 °C and a 2.5 M solution of *n*-butyllithium in hexane (1.2 mL, 3.0 mmol, 2.0 equiv.) was added dropwise. The reaction mixture was stirred at -78 °C for 1.5 h and the iodomethane (0.5 mL, 7.5 mmol, 5.0 equiv.) was then added dropwise. The mixture was warmed to room temperature for another 1 h and 1.0 M hydrochloric acid (10 mL) was added dropwise. The mixture was stirred for additional 30 mins at room temperature. The resulting reaction solution was separated through the separating funnel, the organic layer was collected and the aqueous layer was extracted with diethyl ether (3 × 15 mL). The combined organic layers were dried over anhydrous MgSO<sub>4</sub>, filtered and concentrated in vacuo. The residue was purified by silica gel column chromatography (hexane /ethyl acetate: 10/1) to give the desired product **S5**.

The **S5** (160 mg, 1.0 mmol) was dissolved in DCM (3.0 mL) in reaction tube, then the MsCl (0.18 g, 1.0 mmol, 1.1 equiv.) and Et<sub>3</sub>N (0.15 g, 1.5 mmol, 1.5 equiv.) were added to the above tube. The resulting mixture was stirred for 0.5 h at room temperature. After completion, the reaction mixture was quenched with distilled water and extracted with CH<sub>2</sub>Cl<sub>2</sub> (3 × 10 mL). The combined organic layer was washed with brine, dried over MgSO<sub>4</sub> and filtered. The filtrate was concentrated over vacuo. The resulted residue (crude product **S6**) was used directly for the next reaction.

To a Schlenk tube was sequentially added with the **S6**, benzylamine (0.54 g, 5.0 mmol, 5.0 equiv.) and CH<sub>3</sub>CN (5 mL). The reaction mixture was stirred for overnight at 80 °C. After completion, the reaction mixture was directly purified by flash chromatography on silica gel (gradient elution of EtOAc /petroleum ether, PE : EA = 15 : 1) to afford the compound **1o** (100 mg, total yield 40%).

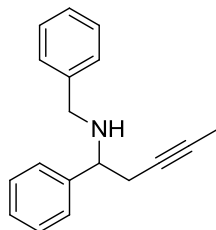

***N*-benzyl-1-phenylpent-3-yn-1-amine (1o)**

Colorless liquid, 100 mg, yield 40%,  $^1\text{H}$  NMR (400 MHz, Chloroform-*d*) 7.40 – 7.23 (m, 10H), 3.82 – 3.78 (dd,  $J = 5.6, 7.6$  Hz, 1H), 3.73 – 3.69 (d,  $J = 13.6$  Hz, 1H), 3.58 – 3.55 (d,  $J = 13.2$  Hz, 1H), 2.52 – 2.41 (m, 2H), 2.14 (s, 1H), 1.78 – 1.77 (t,  $J = 2.4$  Hz, 3H).  $^{13}\text{C}$  NMR (101 MHz,  $\text{CDCl}_3$ )  $\delta$  143.0, 140.6, 128.5, 128.4, 128.1, 127.4, 127.2, 126.9, 77.9, 76.3, 61.3, 51.5, 28.8, 3.6. HRMS ( $\text{ESI}^+$ ) calculated for  $\text{C}_{18}\text{H}_{20}\text{N}$  ( $\text{M}+\text{H}^+$ ) 250.1596; found 250.1593.

## 5. General procedure for the synthesis of **1**, 3-oxazin-ones **2**

The reactions were conducted in a 25 mL oven-dried autoclave with a glass tube inside equipped with magnetic stirring. AgOAc (3.3 mg, 0.02 mmol, 20 mol%), DBU (7.5 mg, 0.05 mmol, 50 mol%), homopropargylic amines **1** (0.1 mmol) and  $\text{CO}_2$  (0.5 MPa, 99.999%) were successively introduced and heated at 80 °C for 6 h. After completion, the vessel was cooled to room temperature, and the pressure was released slowly to atmospheric pressure. The reaction mixture was directly purified by column chromatography on silica gel using petroleum ether/ethyl acetate (v/v,10:1–5:1) as eluents to give the desired products **2** (**2a** – **2m**). The compound **2n** was obtained by flash chromatography on silica gel (gradient elution of EtOAc /petroleum ether, PE : EA = 10 : 1).

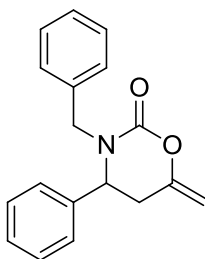

### 3-benzyl-6-methylene-4-phenyl-1,3-oxazinan-2-one (**2a**)

Colorless liquid, 28 mg, yield 99%,  $^1\text{H}$  NMR (400 MHz, Chloroform-*d*) 7.39 – 7.30 (m, 6H), 7.24 – 7.23 (d,  $J = 6.8$  Hz, 2H), 7.16 – 7.15 (d,  $J = 6.8$  Hz, 2H), 5.33 – 5.29 (d,  $J = 15.2$  Hz, 1H), 4.71 (s, 1H), 4.42 – 4.40 (dd,  $J = 2.0, 6.0$  Hz, 1H), 4.05 (s, 1H), 3.69 – 3.65 (d,  $J = 15.2$  Hz, 1H), 2.89 – 2.84 (dd,  $J = 6.4, 14.0$  Hz, 1H), 2.51 – 2.46 (dd,  $J = 2.0, 14.4$  Hz, 1H).  $^{13}\text{C}$  NMR (101 MHz,  $\text{CDCl}_3$ )  $\delta$  151.5, 150.1, 138.7, 136.3, 128.9, 128.8, 128.4, 128.3, 127.9, 126.4, 95.0, 56.1, 50.6, 34.4. HRMS ( $\text{ESI}^+$ ) calculated for  $\text{C}_{18}\text{H}_{18}\text{NO}_2$  ( $\text{M}+\text{H}^+$ ) 280.1338; found 280.1334.

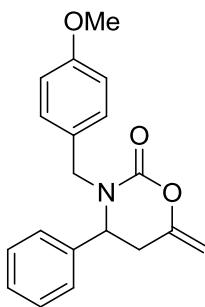

**3-(4-methoxybenzyl)-6-methylene-4-phenyl-1,3-oxazinan-2-one (2b)**

Colorless liquid, 31 mg, yield 99%, m.p. 135.0-136.7°C,  $^1\text{H}$  NMR (400 MHz, Chloroform-*d*) 7.40 – 7.31 (m, 3H), 7.18 – 7.15 (m, 4H), 6.88 – 6.84 (m, 2H), 5.26 – 5.23 (d,  $J = 14.8$  Hz, 1H), 4.70 (s, 1H), 4.42 – 4.40 (dd,  $J = 2.4, 6.0$  Hz, 1H), 4.05 – 4.04 (t,  $J = 1.6$  Hz, 1H), 3.80 (s, 3H), 3.62 – 3.59 (d,  $J = 14.8$  Hz, 1H), 2.86 – 2.80 (dt,  $J = 1.6, 6.4$  Hz, 1H), 2.50 – 2.45 (dd,  $J = 2.8, 14.4$  Hz, 1H).  $^{13}\text{C}$  NMR (101 MHz,  $\text{CDCl}_3$ )  $\delta$  159.3, 151.5, 150.1, 138.8, 129.8, 128.9, 128.34, 128.26, 126.4, 114.1, 94.9, 55.8, 55.3, 50.0, 34.4.

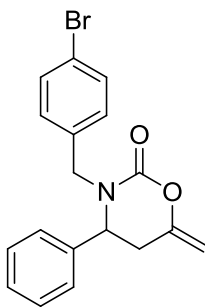

**3-(4-bromobenzyl)-6-methylene-4-phenyl-1,3-oxazinan-2-one (2c)**

Colorless liquid, 36 mg, yield 99%,  $^1\text{H}$  NMR (400 MHz, Chloroform-*d*) 7.46 – 7.44 (d,  $J = 8.4$  Hz, 2H), 7.40 – 7.33 (m, 3H), 7.16 – 7.10 (m, 4H), 5.21 – 5.18 (d,  $J = 15.2$  Hz, 1H), 4.72 (s, 1H), 4.40 – 4.38 (dd,  $J = 2.8, 6.4$  Hz, 1H), 4.08 (s, 1H), 3.68 – 3.65 (d,  $J = 14.8$  Hz, 1H), 2.89 – 2.84 (dd,  $J = 6.0$  Hz, 1H), 2.53 – 2.49 (dd,  $J = 2.8, 14.4$  Hz, 1H).  $^{13}\text{C}$  NMR (101 MHz,  $\text{CDCl}_3$ )  $\delta$  151.5, 149.9, 138.5, 135.3, 131.9, 130.0, 129.0, 128.5, 126.4, 121.9, 95.3, 56.4, 50.1, 34.4. HRMS ( $\text{ESI}^+$ ) calculated for  $\text{C}_{18}\text{H}_{16}\text{BrNO}_2\text{Na}$  ( $\text{M}+\text{Na}^+$ ) 380.0262; found 380.0260.

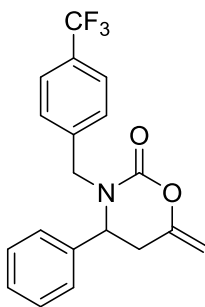

**6-methylene-4-phenyl-3-(4-(trifluoromethyl)benzyl)-1,3-oxazinan-2-one (2d)**

Colorless viscous liquid, 34 mg, yield 98%,  $^1\text{H}$  NMR (400 MHz, Chloroform-*d*) 7.59 – 7.57 (d,  $J = 8.4$  Hz, 2H), 7.40 – 7.34 (m, 5H), 7.16 – 7.14 (dd,  $J = 2.0, 8.0$  Hz, 2H), 5.28 – 5.24 (d,  $J = 15.6$  Hz, 1H), 4.74 (s, 1H), 4.41 – 4.39 (dd,  $J = 2.8, 6.0$  Hz, 1H), 4.10 – 4.09 (t,  $J = 1.2$  Hz, 1H), 3.84 – 3.80 (d,  $J = 15.6$  Hz, 1H), 2.93 – 2.88 (m, 1H), 2.56 – 2.51 (dd,  $J = 2.8, 14.0$  Hz, 1H).  $^{13}\text{C}$  NMR (101 MHz,  $\text{CDCl}_3$ )  $\delta$  151.5, 149.9, 140.4, 138.4, 130.3, 130.0, 129.1, 128.6, 128.4, 126.4, 125.8, 125.74, 125.7, 125.67, 125.4, 122.7, 95.4, 56.8, 50.4, 34.4.  $^{19}\text{F}$  NMR (376 MHz,  $\text{CDCl}_3$ )  $\delta$  -62.4. HRMS ( $\text{ESI}^+$ ) calculated for  $\text{C}_{19}\text{H}_{16}\text{F}_3\text{NNaO}_2$  ( $\text{M}+\text{Na}^+$ ) 370.1031; found 370.1030.

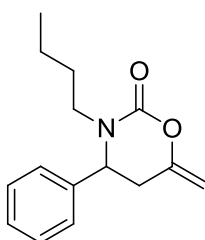

**3-butyl-6-methylene-4-phenyl-1,3-oxazinan-2-one (2e)**

Colorless liquid, 22 mg, yield 87%,  $^1\text{H}$  NMR (400 MHz, Chloroform-*d*) 7.39 – 7.27 (m, 3H), 7.18 – 7.17 (d,  $J = 7.2$  Hz, 2H), 4.66 (s, 1H), 4.56 – 4.54 (q,  $J = 2.8, 6.0$  Hz, 1H), 4.03 (s, 1H), 3.74 – 3.67 (m, 1H), 3.00 – 2.95 (dd,  $J = 6.0, 14.0$  Hz, 1H), 2.85 – 2.78 (m, 1H), 2.56 – 2.52 (dd,  $J = 2.4, 14.0$  Hz, 1H), 1.59 – 1.51 (m, 2H), 1.32 – 1.23 (m, 2H), 0.90 – 0.86 (t,  $J = 7.2$  Hz, 3H).  $^{13}\text{C}$  NMR (101 MHz,  $\text{CDCl}_3$ )  $\delta$  151.0, 150.1, 139.3, 128.8, 128.2, 126.2, 94.6, 57.7, 48.4, 34.5, 29.5, 20.0, 13.8. HRMS ( $\text{ESI}^+$ ) calculated for  $\text{C}_{15}\text{H}_{19}\text{NNaO}_2$  ( $\text{M}+\text{Na}^+$ ) 268.1313; found 268.1313.

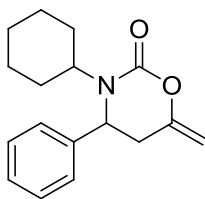

**3-cyclohexyl-6-methylene-4-phenyl-1,3-oxazinan-2-one (2f)**

Colorless liquid, 22 mg, yield 81%,  $^1\text{H}$  NMR (400 MHz, Chloroform-*d*) 7.35 – 7.27 (m, 3H), 7.18 – 7.16 (d,  $J = 7.2$  Hz, 2H), 4.68 – 4.66 (d,  $J = 4.8$  Hz, 1H), 4.60 (s, 1H), 4.13 – 4.07 (m, 1H), 3.92 (s, 1H), 2.89 – 2.84 (dd,  $J = 5.6, 14.4$  Hz, 1H), 2.51 – 2.48 (d,  $J = 14.0$  Hz, 1H), 1.80 – 1.78 (d,  $J = 9.6$  Hz, 2H), 1.64 – 1.49 (m, 4H), 1.41 – 1.16 (m, 2H), 1.12 – 0.95 (m, 2H).  $^{13}\text{C}$  NMR (101 MHz,  $\text{CDCl}_3$ )  $\delta$  150.7, 149.9, 140.9, 128.5, 127.8, 126.0, 94.0, 57.8, 53.8, 35.3, 30.8, 30.0, 25.8, 25.6, 25.3 HRMS ( $\text{ESI}^+$ ) calculated for  $\text{C}_{17}\text{H}_{21}\text{NNaO}_2$  ( $\text{M}+\text{Na}^+$ ) 294.1470; found 294.1469.

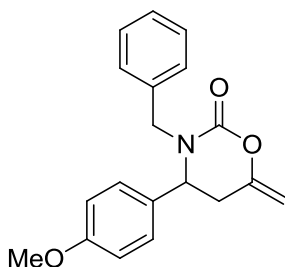

**3-benzyl-4-(4-methoxyphenyl)-6-methylene-1,3-oxazinan-2-one (2g)**

Colorless liquid, 31 mg, yield 99%,  $^1\text{H}$  NMR (400 MHz, Chloroform-*d*) 7.36 – 7.83 (m, 3H), 7.24 – 7.22 (t,  $J = 1.2$  Hz, 2H), 7.09 – 7.07 (d,  $J = 8.8$  Hz, 2H), 6.91 – 6.88 (d,  $J = 8.8$  Hz, 2H), 5.30 – 5.27 (d,  $J = 15.2$  Hz, 1H), 4.72 (s, 1H), 4.37 – 4.35 (dd,  $J = 2.1, 6.0$  Hz, 1H), 4.08 (s, 1H), 3.82 (s, 3H), 3.68 – 3.65 (d,  $J = 14.8$  Hz, 1H), 2.86 – 2.81 (dd,  $J = 6.0, 14.0$  Hz, 1H), 2.48 – 2.44 (dd,  $J = 2.4, 14.0$  Hz, 1H).  $^{13}\text{C}$  NMR (101 MHz,  $\text{CDCl}_3$ )  $\delta$  159.6, 151.5, 150.3, 136.3, 130.7, 128.8, 128.2, 127.9, 127.6, 114.3, 95.0, 55.5, 55.3, 50.4, 34.5. HRMS ( $\text{ESI}^+$ ) calculated for  $\text{C}_{19}\text{H}_{19}\text{NNaO}_3$  ( $\text{M}+\text{Na}^+$ ) 332.1263; found 332.1262.

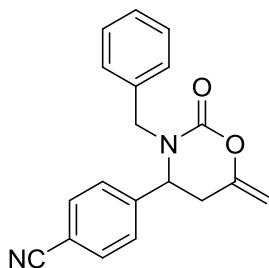

**4-(3-benzyl-6-methylene-2-oxo-1,3-oxazinan-4-yl)benzonitrile (2h)**

Colorless viscous liquid, 30 mg, yield 99%,  $^1\text{H}$  NMR (400 MHz, Chloroform-*d*) 7.68 – 7.66 (d,  $J$  = 8.0 Hz, 2H), 7.33 – 7.32 (d,  $J$  = 6.0 Hz, 3H), 7.28 – 7.26 (d,  $J$  = 8.0 Hz, 2H), 7.22 – 7.20 (t,  $J$  = 2.0, 7.6 Hz, 2H), 5.28 – 5.25 (d,  $J$  = 14.8 Hz, 1H), 4.73 (s, 1H), 4.51 – 4.49 (dd,  $J$  = 1.6, 6.0 Hz, 1H), 4.06 (s, 1H), 3.74 – 3.71 (d,  $J$  = 14.8 Hz, 1H), 2.94 – 2.89 (dd,  $J$  = 6.0, 14.0 Hz, 1H), 2.48 – 2.44 (dd,  $J$  = 2.0, 14.0 Hz, 1H).  $^{13}\text{C}$  NMR (101 MHz,  $\text{CDCl}_3$ )  $\delta$  151.1, 149.2, 144.2, 135.6, 132.7, 128.9, 128.3, 127.1, 118.2, 112.4, 95.7, 56.0, 51.2, 34.0. HRMS ( $\text{ESI}^+$ ) calculated for  $\text{C}_{19}\text{H}_{16}\text{N}_2\text{NaO}_2$  ( $\text{M}+\text{Na}^+$ ) 327.1109; found 327.1106.

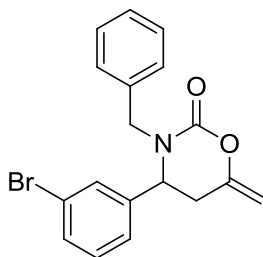

**3-benzyl-4-(3-bromophenyl)-6-methylene-1,3-oxazinan-2-one (2i)**

Colorless liquid, 36 mg, yield 99%,  $^1\text{H}$  NMR (400 MHz, Chloroform-*d*) 7.47 – 7.45 (d, 1H), 7.36 – 7.22 (m, 7H), 7.10 – 7.08 (d,  $J$  = 7.6 Hz, 1H), 5.31 – 5.27 (d,  $J$  = 15.2 Hz, 1H), 4.74 (s, 1H), 4.40 – 4.38 (dd,  $J$  = 2.4, 6.0 Hz, 1H), 4.07 – 4.06 (t,  $J$  = 2 Hz, 1H), 3.71 – 3.67 (d,  $J$  = 15.2 Hz, 1H), 2.89 – 2.84 (dd,  $J$  = 6.4, 14.4 Hz, 1H), 2.49 – 2.44 (dd,  $J$  = 2.4, 14.4 Hz, 1H).  $^{13}\text{C}$  NMR (101 MHz,  $\text{CDCl}_3$ )  $\delta$  151.3, 149.5, 141.1, 135.9, 131.6, 130.5, 129.5, 128.9, 128.2, 128.1, 124.9, 123.1, 95.5, 55.6, 50.9, 34.2. HRMS ( $\text{ESI}^+$ ) calculated for  $\text{C}_{18}\text{H}_{16}\text{BrNNaO}_2$  ( $\text{M}+\text{Na}^+$ ) 380.0262; found 380.0260.

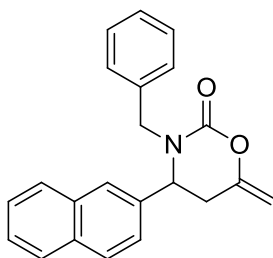

**3-benzyl-6-methylene-4-(naphthalen-2-yl)-1,3-oxazinan-2-one (2j)**

Colorless liquid, 31 mg, yield 93%,  $^1\text{H}$  NMR (400 MHz, Chloroform-*d*) 7.91 – 7.89 (q, 1H), 7.83 – 7.81 (d,  $J = 8.4$  Hz, 1H), 7.69 – 7.67 (q, 1H), 7.51 – 7.47 (m, 3H), 7.34 – 7.28 (m, 4H), 7.22 – 7.20 (q,  $J = 3.2, 2.0$  Hz, 2H), 5.42 – 5.38 (d,  $J = 15.2$  Hz, 1H), 5.27 – 5.26 (d,  $J = 4.8$  Hz, 1H), 4.62 (s, 1H), 3.83 (s, 1H), 3.68 – 3.64 (d,  $J = 15.2$  Hz, 1H), 2.98 – 2.93 (m, 1H), 2.67 – 2.63 (dd,  $J = 1.2, 14.0$  Hz, 1H).  $^{13}\text{C}$  NMR (101 MHz,  $\text{CDCl}_3$ )  $\delta$  152.0, 150.1, 136.4, 134.1, 133.0, 130.0, 129.5, 128.9, 128.9, 128.3, 128.0, 126.8, 125.9, 125.4, 123.7, 121.5, 95.4, 52.7, 51.0, 33.1. HRMS (ESI $^+$ ) calculated for  $\text{C}_{22}\text{H}_{20}\text{NO}_2$  ( $\text{M}+\text{H}^+$ ) 330.1494; found 330.1493.

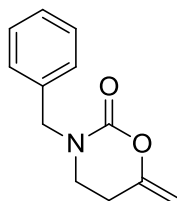

**3-benzyl-6-methylene-1,3-oxazinan-2-one (2k)**

Colorless liquid, 20 mg, yield 99%,  $^1\text{H}$  NMR (400 MHz, Chloroform-*d*) 7.37 – 7.27 (m, 5H), 4.67 (s, 1H), 4.59 (s, 2H), 4.24 (s, 1H), 3.23 – 3.20 (t,  $J = 6.4$  Hz, 2H), 2.56 – 2.53 (t,  $J = 6.0$  Hz, 2H).  $^{13}\text{C}$  NMR (101 MHz,  $\text{CDCl}_3$ )  $\delta$  152.7, 151.2, 136.2, 128.8, 128.1, 127.9, 92.9, 52.7, 43.2, 26.2.<sup>[6]</sup>

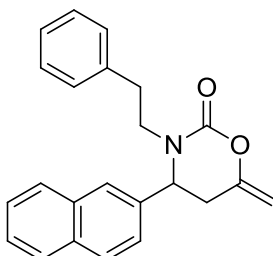

**6-methylene-4-(naphthalen-2-yl)-3-phenethyl-1,3-oxazinan-2-one (2l)**

Colorless liquid, 31 mg, yield 91%,  $^1\text{H}$  NMR (400 MHz, Chloroform-*d*) 7.91 – 7.88 (q, 1H), 7.80 – 7.78 (d,  $J = 8.4$  Hz, 1H), 7.52 – 7.50 (q, 2H), 7.47 – 7.41 (m, 2H), 7.35



–7.29 (m, 3H), 7.22 – 7.19 (q, 3H), 4.80 – 4.79 (d,  $J = 4.8$  Hz, 1H), 4.58 (s, 1H), 4.16 – 4.10 (m, 1H), 3.80 (s, 1H), 3.14 – 3.06 (m, 1H), 2.94 – 2.79 (m, 3H), 2.50 – 2.47 (d,  $J = 14.0$  Hz, 1H).  $^{13}\text{C}$  NMR (101 MHz,  $\text{CDCl}_3$ )  $\delta$  152.0, 150.1, 136.4, 134.1, 133.0, 130.0, 129.5, 128.9, 128.9, 128.3, 128.0, 126.8, 125.9, 125.4, 123.7, 121.5, 95.4, 55.3, 50.9, 34.1, 32.7. HRMS ( $\text{ESI}^+$ ) calculated for  $\text{C}_{23}\text{H}_{21}\text{NNaO}_2$  ( $\text{M}+\text{Na}^+$ ) 366.1470; found 366.1469.

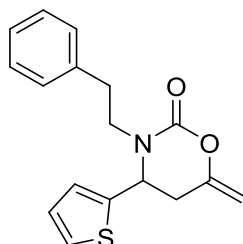

**6-methylene-3-phenethyl-4-(thiophen-2-yl)-1,3-oxazinan-2-one (2m)**

Colorless liquid, 27 mg, yield 90%, m.p. 136.9–137.9°C,  $^1\text{H}$  NMR (400 MHz,  $\text{Chloroform-}d$ ) 7.32 – 7.19 (m, 6H), 6.96 – 6.94 (t,  $J = 3.6$  Hz, 1H), 6.86 – 6.85 (d,  $J = 3.2$  Hz, 1H), 4.73 (s, 1H), 4.33 – 4.31 (q,  $J = 2.8, 6.0$  Hz, 1H), 4.16 (s, 1H), 4.00 – 3.93 (m, 1H), 3.16 – 3.09 (m, 1H), 3.05 – 2.98 (m, 1H), 2.85 – 2.79 (m, 1H), 2.76 – 2.71 (q,  $J = 5.6$  Hz, 1H), 2.50 – 2.46 (dd,  $J = 2.8, 14.4$  Hz, 1H).  $^{13}\text{C}$  NMR (101 MHz,  $\text{CDCl}_3$ )  $\delta$  150.1, 142.5, 138.7, 128.9, 128.7, 126.9, 126.7, 125.5, 125.4, 95.3, 54.7, 50.5, 34.3, 33.9. HRMS ( $\text{ESI}^+$ ) calculated for  $\text{C}_{17}\text{H}_{17}\text{NNaO}_2\text{S}$  ( $\text{M}+\text{Na}^+$ ) 322.0878; found 322.0876.

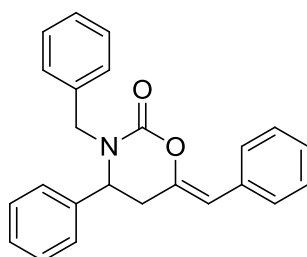

**(Z)-3-benzyl-6-benzylidene-4-phenyl-1,3-oxazinan-2-one (2n)**

Colorless liquid, 15 mg, yield 43%,  $^1\text{H}$  NMR (400 MHz,  $\text{Chloroform-}d$ ) 7.64 – 7.62 (d,  $J = 7.6$  Hz, 2H), 7.37 – 7.15 (m, 13H), 5.35 – 5.31 (d,  $J = 15.2$  Hz, 1H), 5.22 (s, 1H), 4.47 – 4.45 (q,  $J = 2.4, 6.0$  Hz, 1H), 3.73 – 3.69 (d,  $J = 14.8$  Hz, 1H), 3.07 – 3.02 (q,  $J = 6.0, 14.0$  Hz, 1H), 2.55 – 2.51 (dd,  $J = 2.4, 14.0$  Hz, 1H).  $^{13}\text{C}$  NMR (101 MHz,  $\text{CDCl}_3$ )  $\delta$  151.1, 143.2, 138.8, 136.2, 133.7, 129.0, 128.8, 128.4, 128.4, 128.3, 127.9,

127.0, 126.5, 126.2, 109.8, 56.5, 50.8, 35.7 . HRMS (ESI<sup>+</sup>) calculated for C<sub>24</sub>H<sub>21</sub>NNaO<sub>2</sub> (M+Na<sup>+</sup>) 378.1470; found 378.1468.

## 6. The transformation of the 1, 3-oxazin-ones **2a**

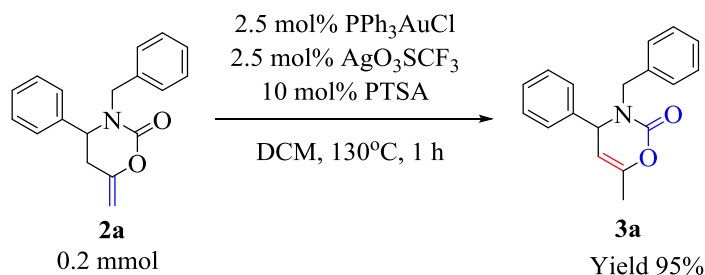

The Ph<sub>3</sub>PAuCl (2.5 mg, 0.005 mmol, 2.5 mol%), AgOTf (1.3 mg, 0.005 mmol, 2.5 mol%), and *p*-toluenesulfonic acid (3.4 mg, 0.02 mmol, 10 mol%) were sequentially added to a stirred solution of the corresponding **2a** (56 mg, 0.2 mmol) in dichloromethane (2 mL). The resulting mixture was heated in a sealed tube at 130 °C until disappearance of the starting material (TLC, for about 45 mins). The reaction mixture was cooled to room temperature and filtered through a pack of celite. The filtrate was extracted with dichloromethane (3 × 5 mL), and the combined extracts were washed twice with saturated brine. The organic layer was dried over MgSO<sub>4</sub> and concentrated under reduced pressure. Column chromatography isolation of the residue gave the analytically pure adduct **3a** (53 mg, yield 95%).<sup>[7]</sup>

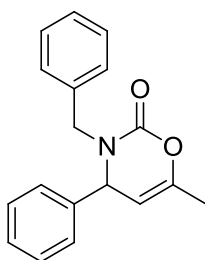

### 3-benzyl-6-methyl-4-phenyl-3,4-dihydro-2H-1,3-oxazin-2-one (**3a**)

Colorless liquid, 53 mg, yield 95%, <sup>1</sup>H NMR (400 MHz, Chloroform-*d*) 7.32 – 7.21 (m, 6H), 7.16 – 7.13 (t, *J* = 7.2 Hz, 4H), 5.19 – 5.16 (d, *J* = 14.8 Hz, 1H), 4.73 – 4.72 (d, *J* = 3.6 Hz, 1H), 4.58 – 4.57 (d, *J* = 2.8 Hz, 1H), 3.52 – 3.48 (d, *J* = 15.2 Hz, 1H), 1.81 (s, 3H). <sup>13</sup>C NMR (101 MHz, CDCl<sub>3</sub>) δ 151.0, 146.3, 140.3, 135.7, 129.1, 128.7, 128.6, 128.4, 127.9, 127.1, 100.3, 58.3, 48.8, 18.4. HRMS (ESI<sup>+</sup>) calculated for C<sub>18</sub>H<sub>18</sub>NO<sub>2</sub> (M+H<sup>+</sup>) 280.1338; found 280.1335.

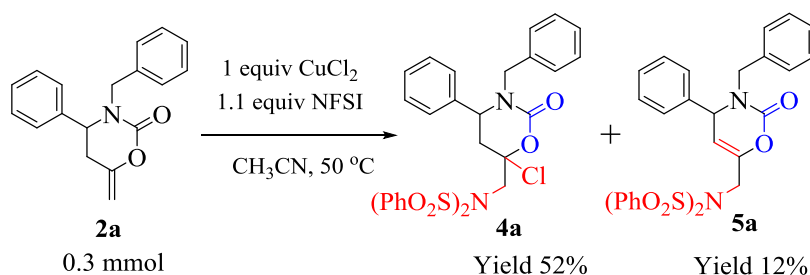

To a Schlenk tube was added NFSI (142 mg, 0.45 mmol, 1.5 equiv), CuCl (3 mg, 0.03 mmol, 0.1 equiv) and CuCl<sub>2</sub> (40 mg, 0.3 mmol, 1.0 equiv) under N<sub>2</sub> atmosphere. Then **2a** (0.3 mmol, 84mg, 1.0 equiv) and CH<sub>3</sub>CN (1.5 mL) were sequentially added into a Schlenk tube. The reaction mixture was stirred at 60 °C for about 1 h until complete disappearance of **2a** (monitored by TLC). The mixture was passed through a short Al<sub>2</sub>O<sub>3</sub> column by using CH<sub>2</sub>Cl<sub>2</sub> as elution and concentrated in vacuo, and purified by flash chromatography on silica gel (gradient elution of EtOAc/petroleum ether, PE/EA=10:1).<sup>[8]</sup>

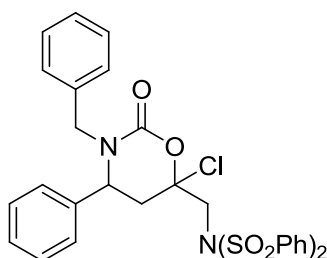

**N-((3-benzyl-6-chloro-2-oxo-4-phenyl-1,3-oxazinan-6-yl)methyl)-N-(phenylsulfon  
yl)benzenesulfonamide (4a)**

Colorless liquid, 95 mg, yield 52%, <sup>1</sup>H NMR (400 MHz, Chloroform-*d*) 8.17 – 8.16 (d, *J* = 4.4 Hz, 4H), 7.75 – 7.71 (t, *J* = 7.2 Hz, 2H), 7.64 – 7.60 (t, *J* = 7.6 Hz, 4H), 7.33 – 7.25 (m, 6H), 7.02 (s, 2H), 6.64 – 6.62 (d, *J* = 6.8 Hz, 2H), 5.08 – 5.04 (d, *J* = 14.8 Hz, 1H), 4.82 – 4.78 (d, *J* = 16 Hz, 1H), 4.46 – 4.42 (dd, *J* = 5.6, 11.2 Hz, 1H), 4.37 – 4.33 (d, *J* = 16 Hz, 1H), 3.45 – 3.42 (d, *J* = 10.8 Hz, 1H), 2.59 – 2.54 (dd, *J* = 5.6, 14.8 Hz, 1H), 1.98 – 1.92 (dd, *J* = 11.6, 14.4 Hz, 1H). <sup>13</sup>C NMR (101 MHz, CDCl<sub>3</sub>) δ 150.2, 139.8, 137.6, 135.2, 134.1, 129.2, 129.1, 128.8, 128.5, 128.4, 127.8, 127.3, 127.2, 98.0, 58.0, 55.7, 49.1, 40.1. HRMS (ESI<sup>+</sup>) calculated for C<sub>30</sub>H<sub>27</sub>ClN<sub>2</sub>NaO<sub>6</sub>S<sub>2</sub> (M+Na<sup>+</sup>) 633.0897; found 633.0895.

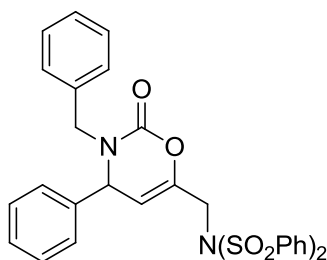

***N*-((3-benzyl-2-oxo-4-phenyl-3,4-dihydro-2*H*-1,3-oxazin-6-yl)methyl)-*N*-(phenylsulfonyl)benzenesulfonamide (5a)**

Colorless liquid, 21 mg, yield 12%,  $^1\text{H}$  NMR (400 MHz, Chloroform-*d*) 7.98 – 7.96 (d,  $J = 8.0$  Hz, 4H), 7.57 – 7.53 (t,  $J = 7.6$  Hz, 2H), 7.43 – 7.34 (m, 10H), 7.21 – 7.15 (m, 4H), 5.20 – 5.16 (d,  $J = 15.2$  Hz, 1H), 4.87 – 4.86 (d,  $J = 4$  Hz, 1H), 4.60 – 4.59 (d,  $J = 4$  Hz, 1H), 4.52 – 4.47 (d,  $J = 18.0$  Hz, 1H), 4.37 – 4.32 (d,  $J = 18$  Hz, 1H), 3.56 – 3.52 (d,  $J = 13.2$  Hz, 1H).  $^{13}\text{C}$  NMR (101 MHz,  $\text{CDCl}_3$ )  $\delta$  149.7, 143.8, 139.2, 138.9, 135.2, 134.1, 129.3, 129.0, 128.9, 128.8, 128.55, 128.54, 128.1, 127.3, 102.3, 58.3, 48.9, 47.5. HRMS ( $\text{ESI}^+$ ) calculated for  $\text{C}_{30}\text{H}_{26}\text{N}_2\text{NaO}_6\text{S}_2$  ( $\text{M}+\text{Na}^+$ ) 597.1130; found 597.1128.

## 7. The spectra of homopropargylamines **1** and **1n**

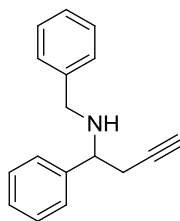

**1a**

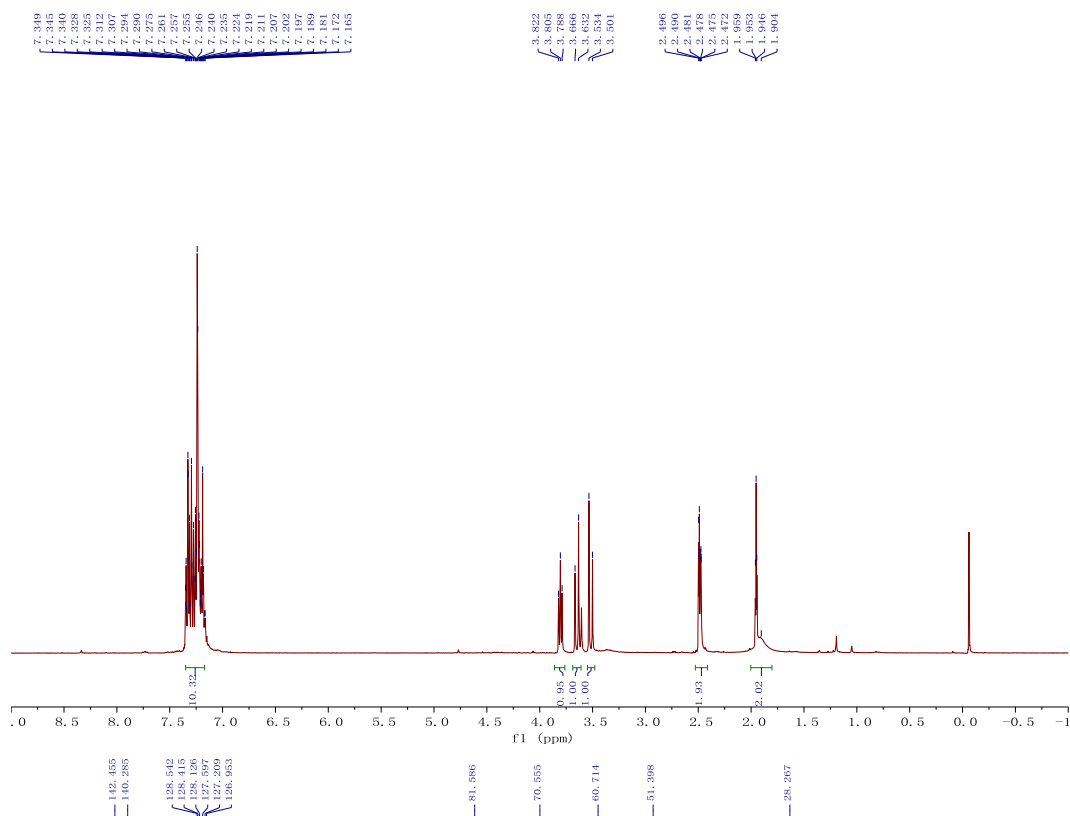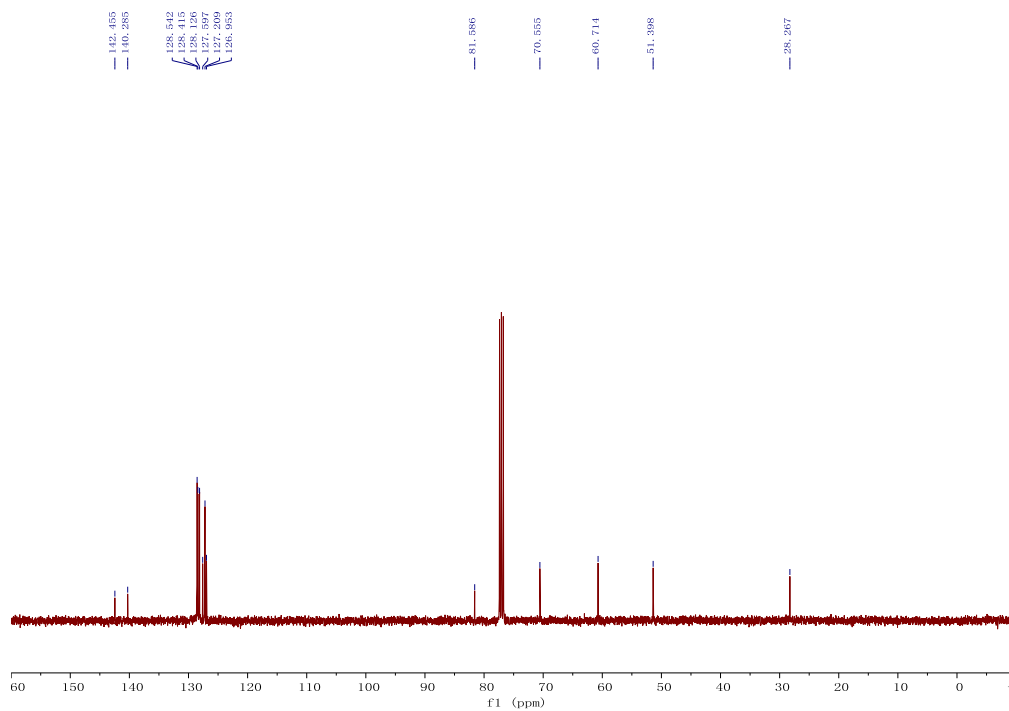

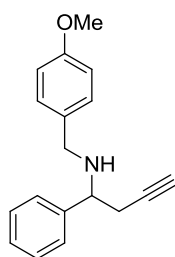

**1b**

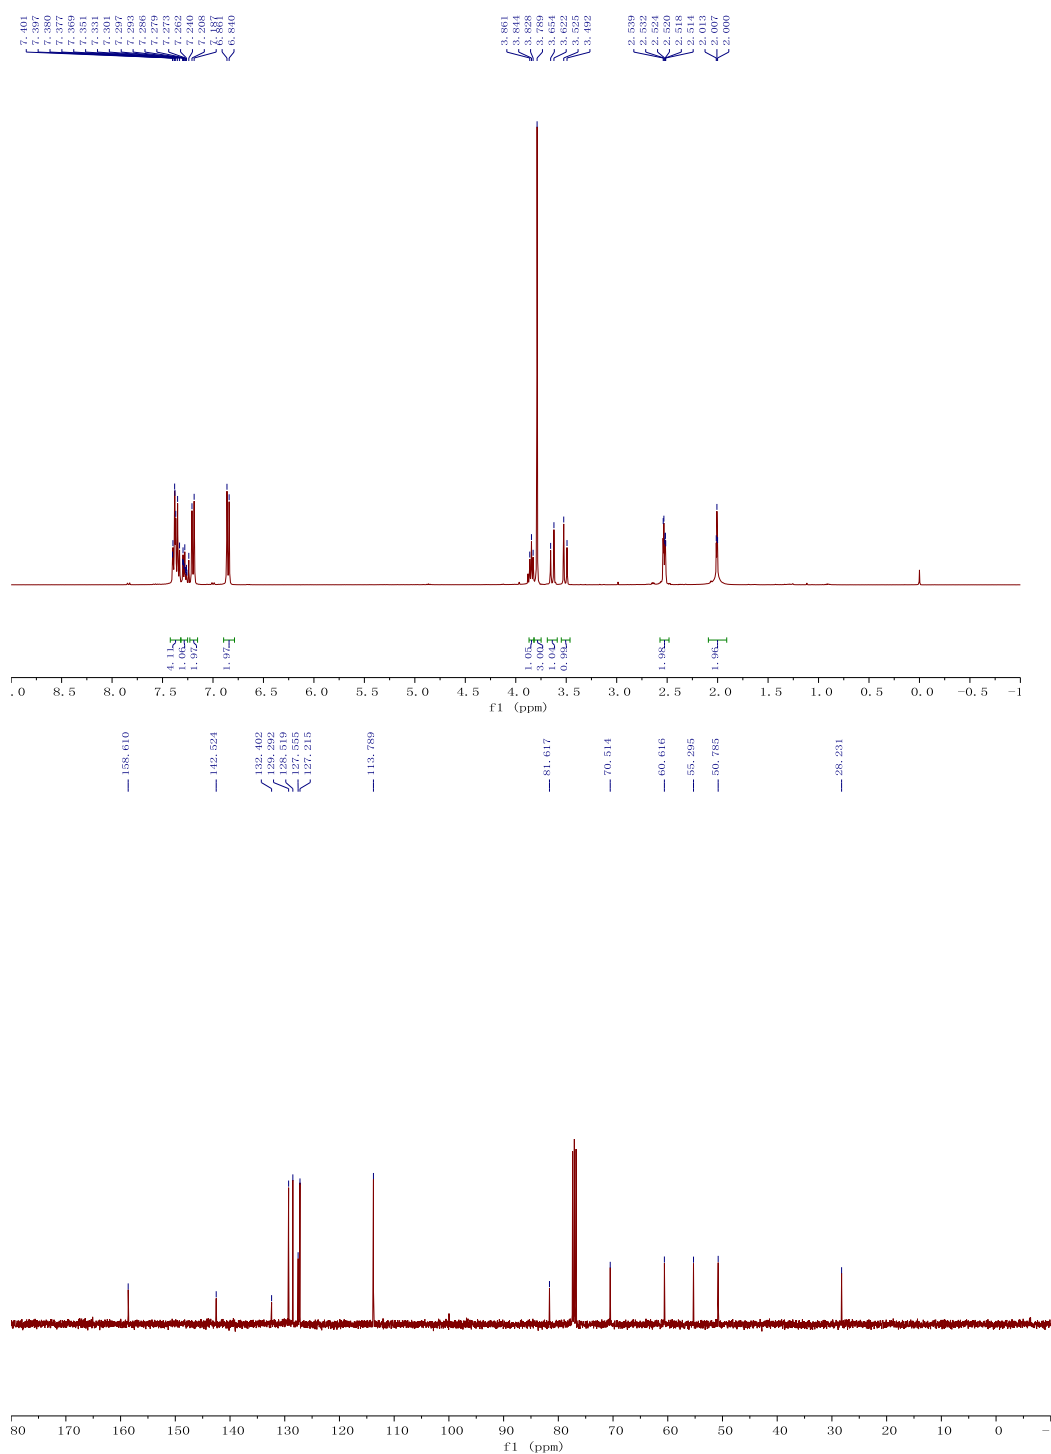

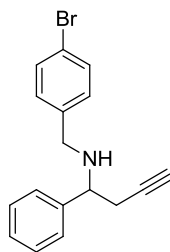

**1c**

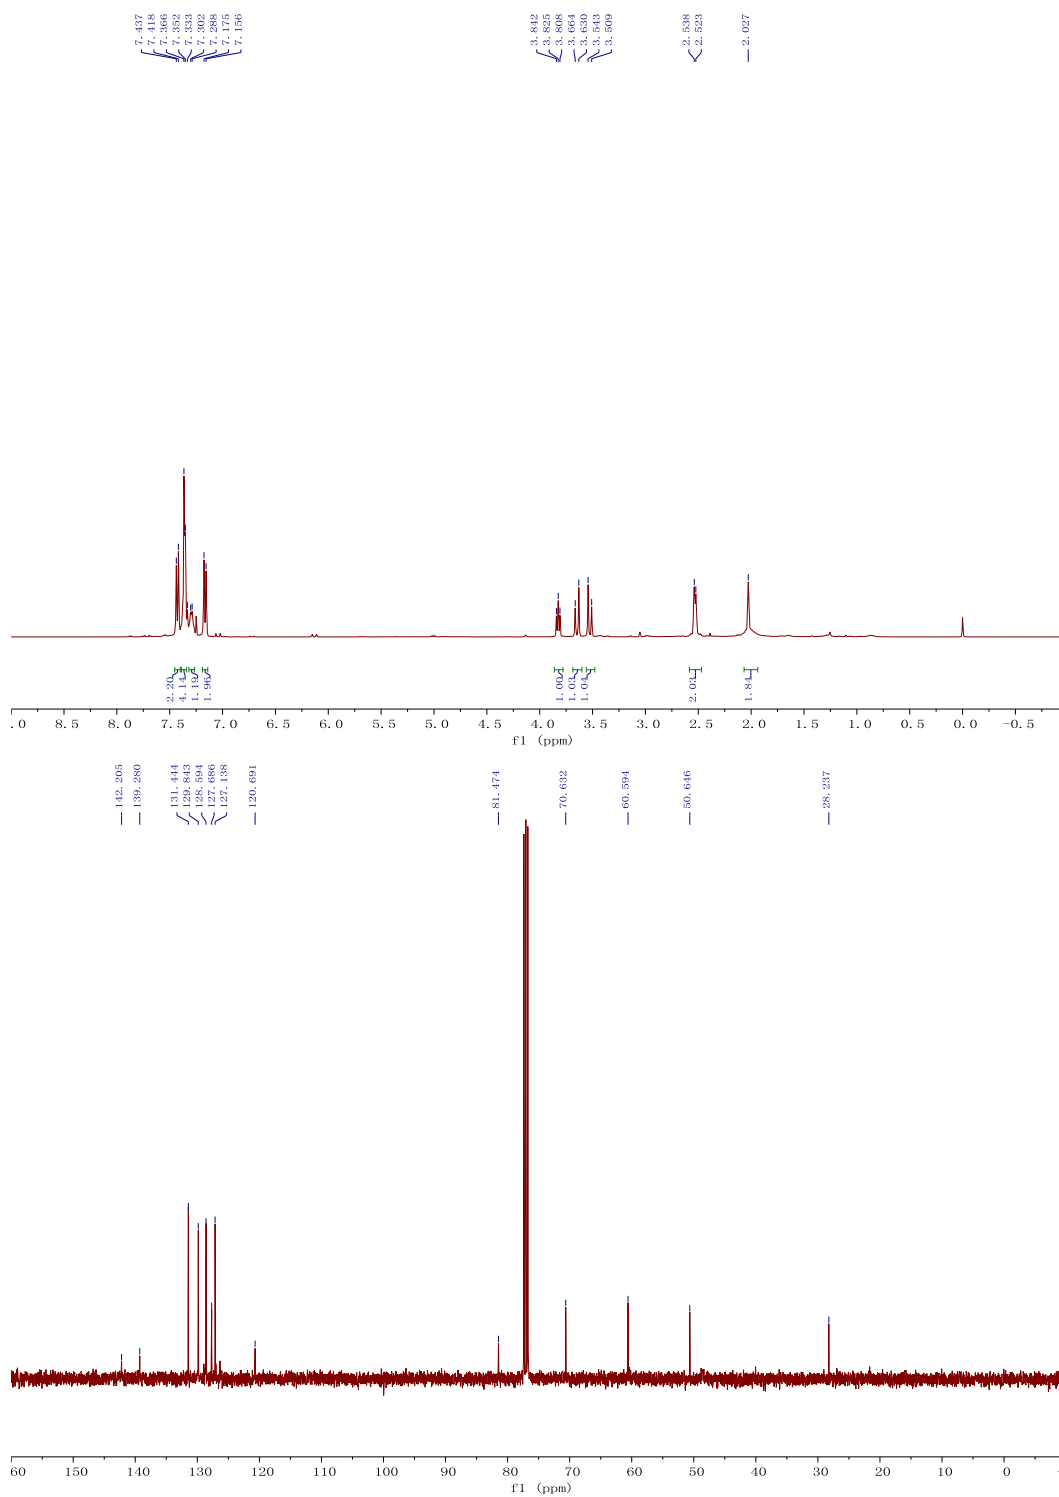

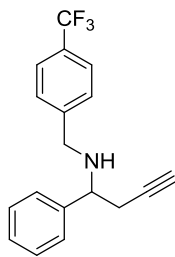

**1d**

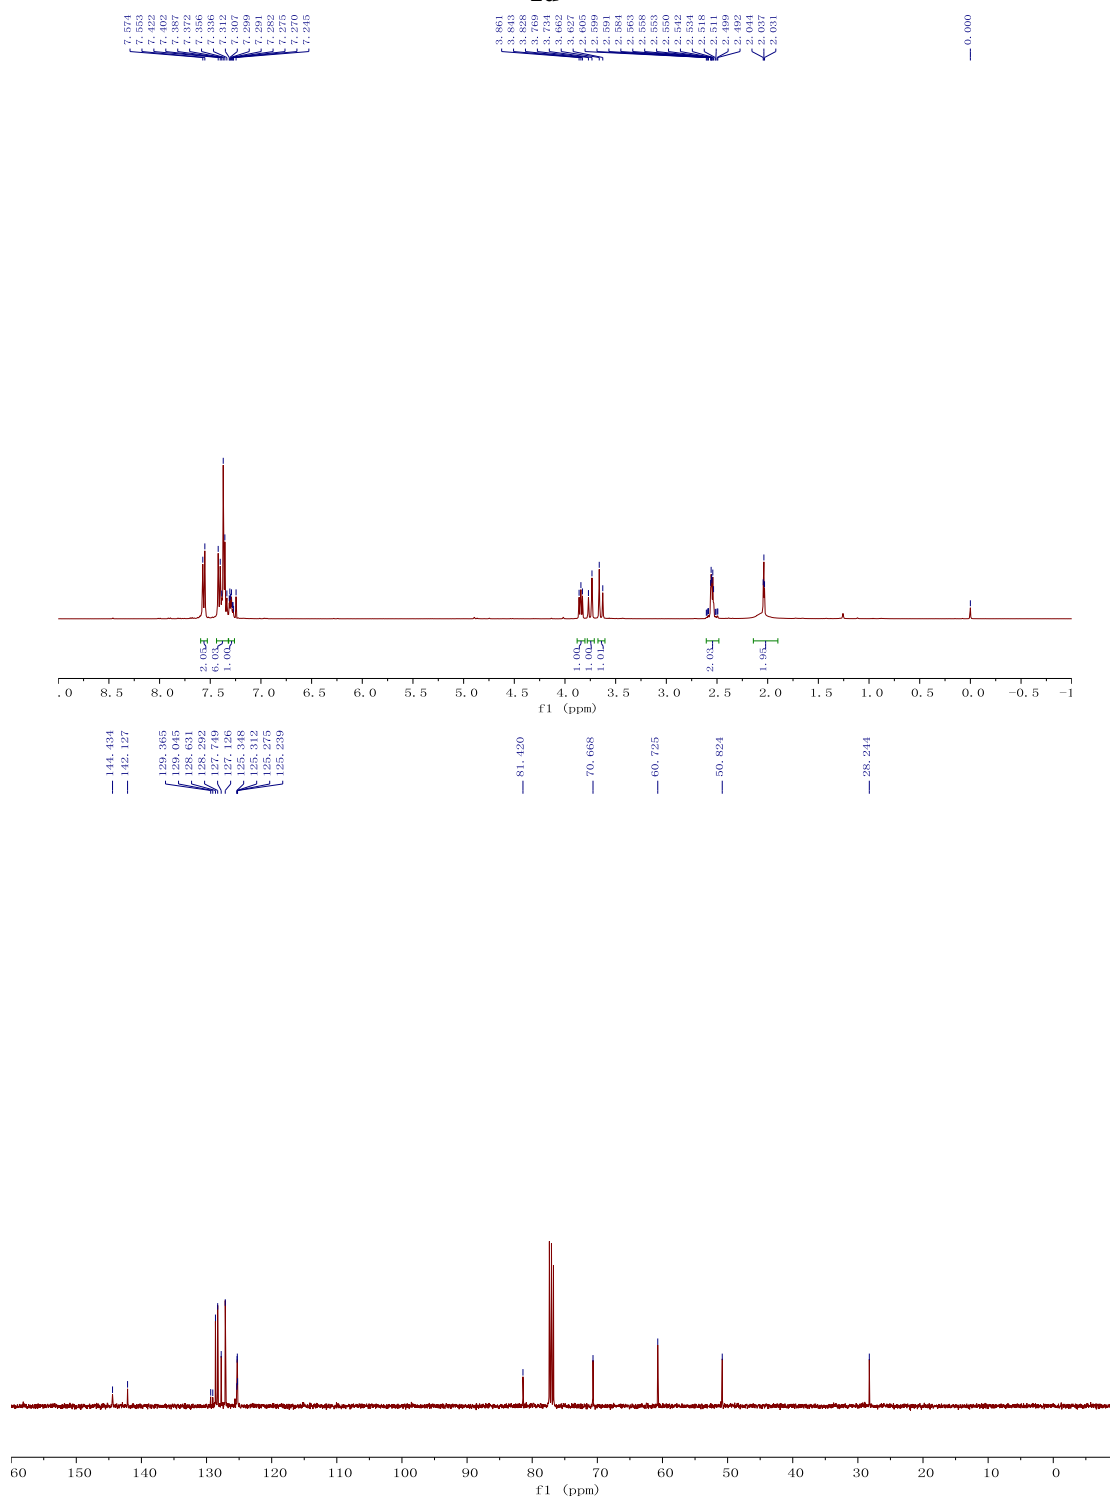



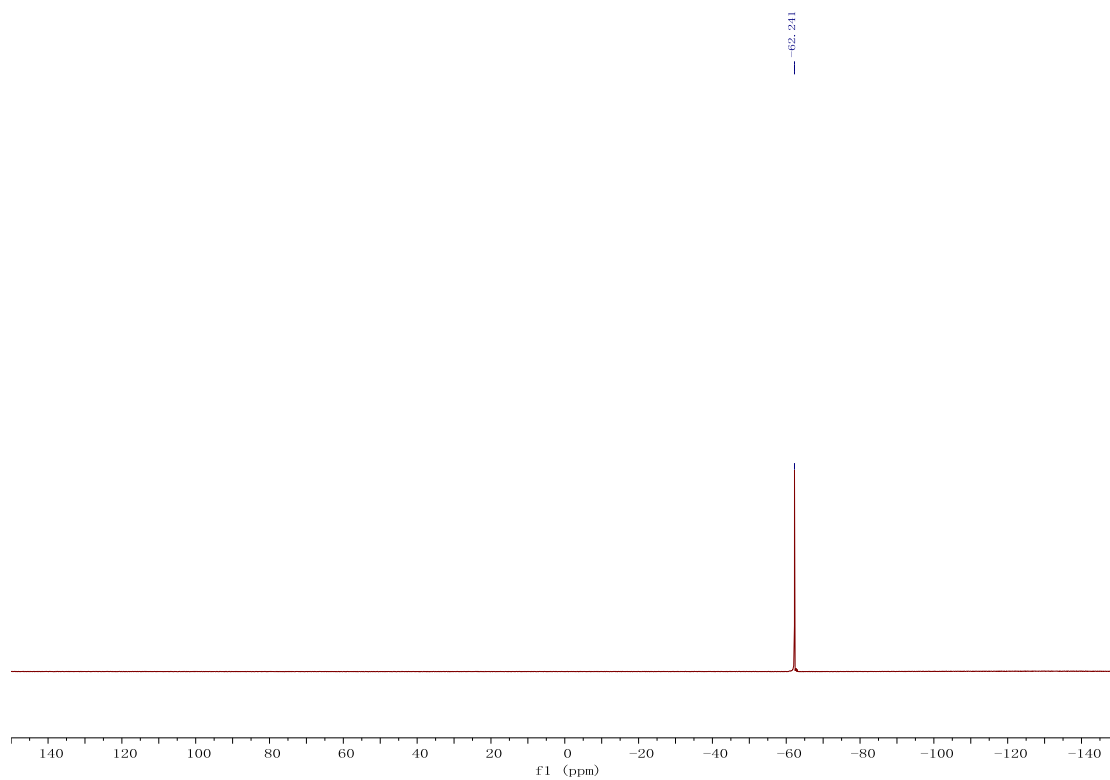

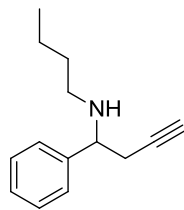

**1e**

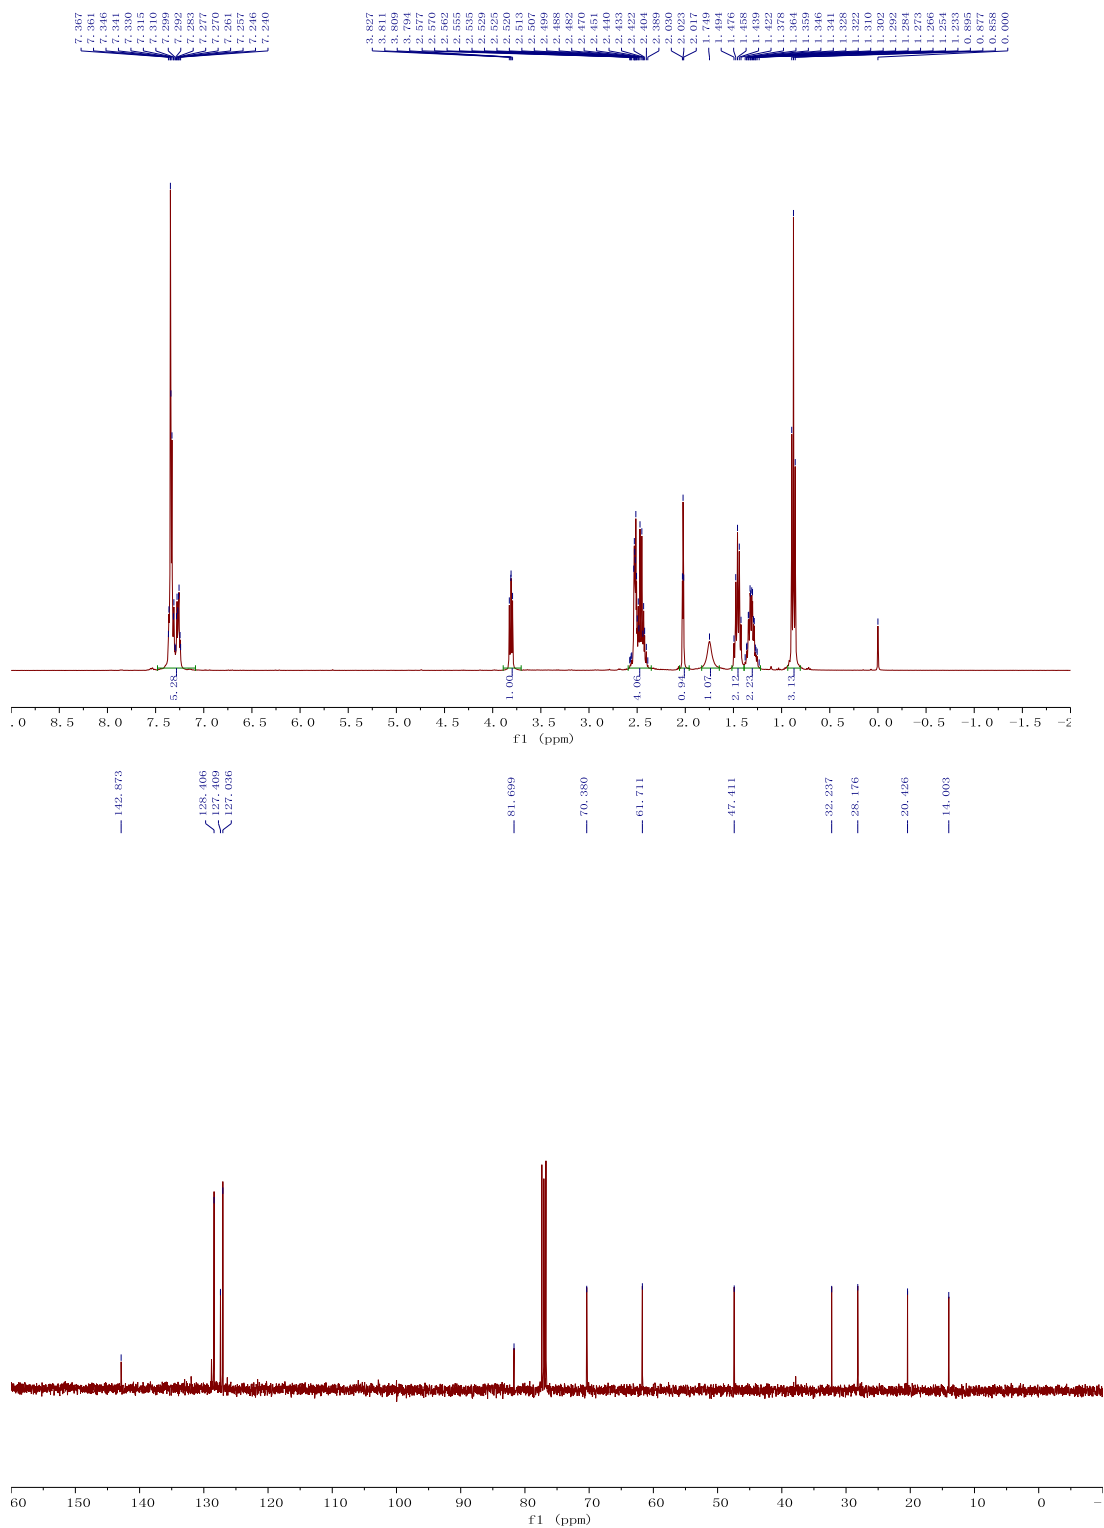

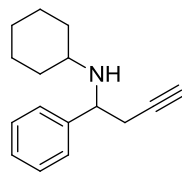

**1f**

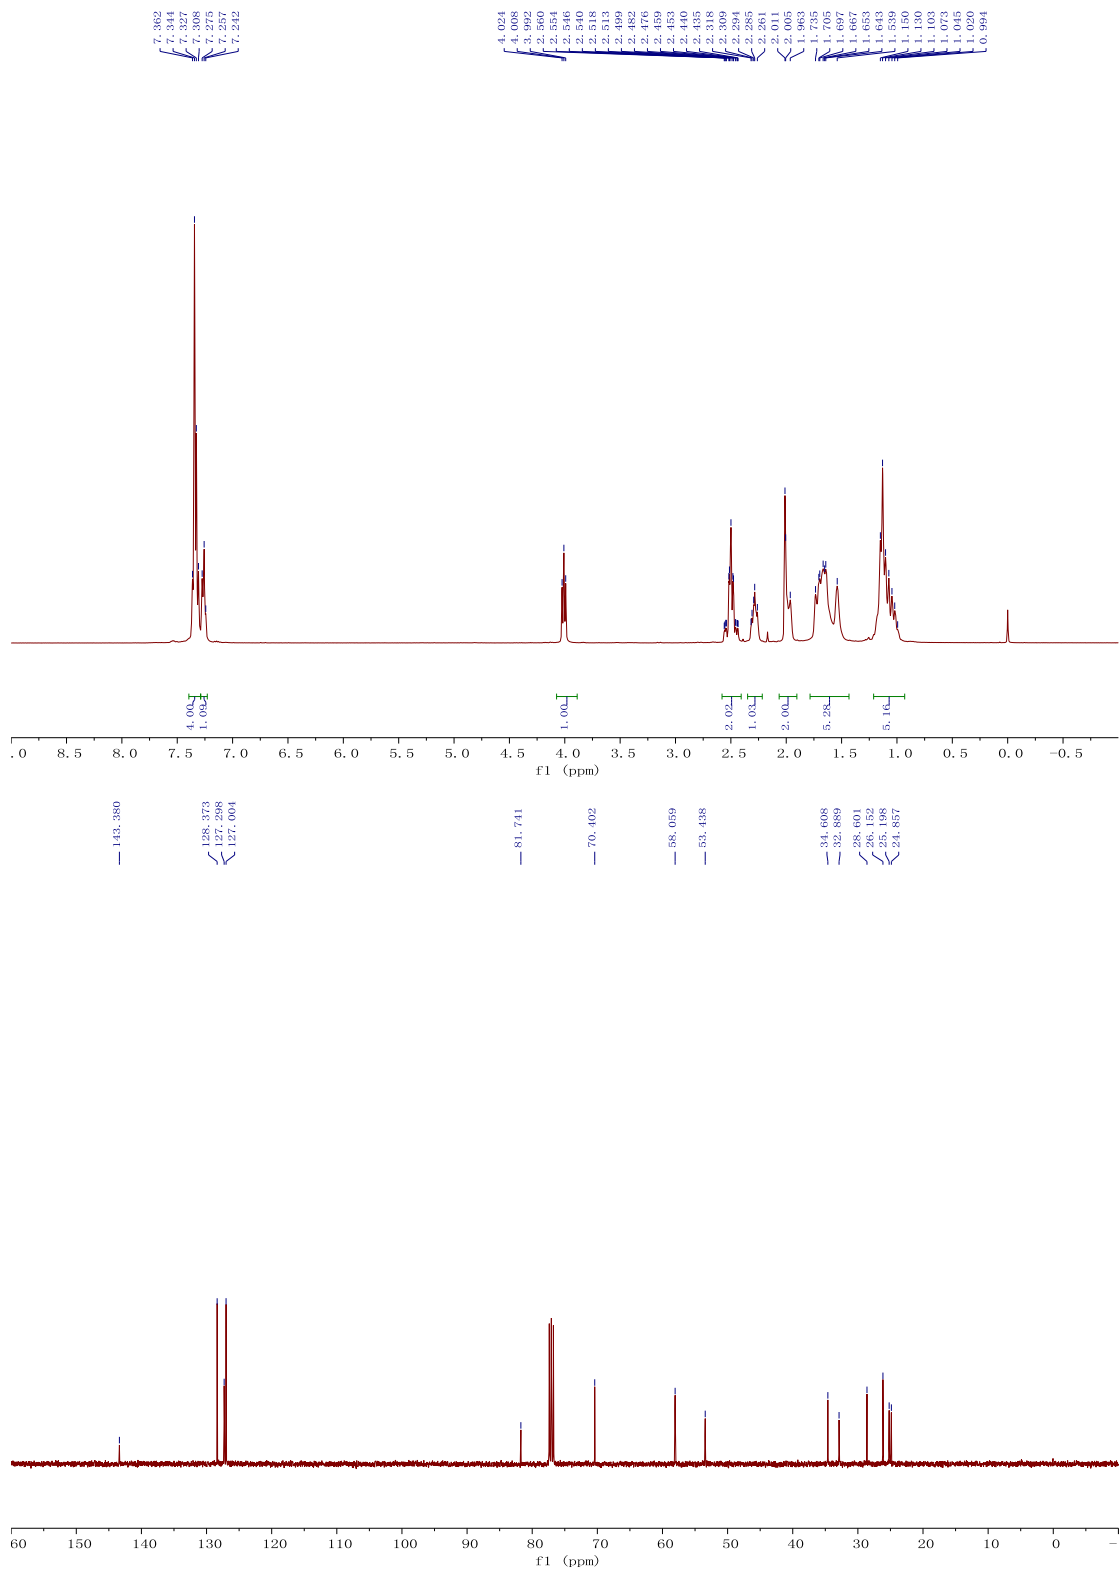

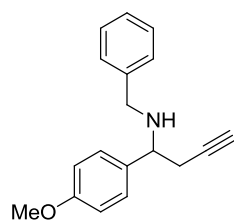

**1g**

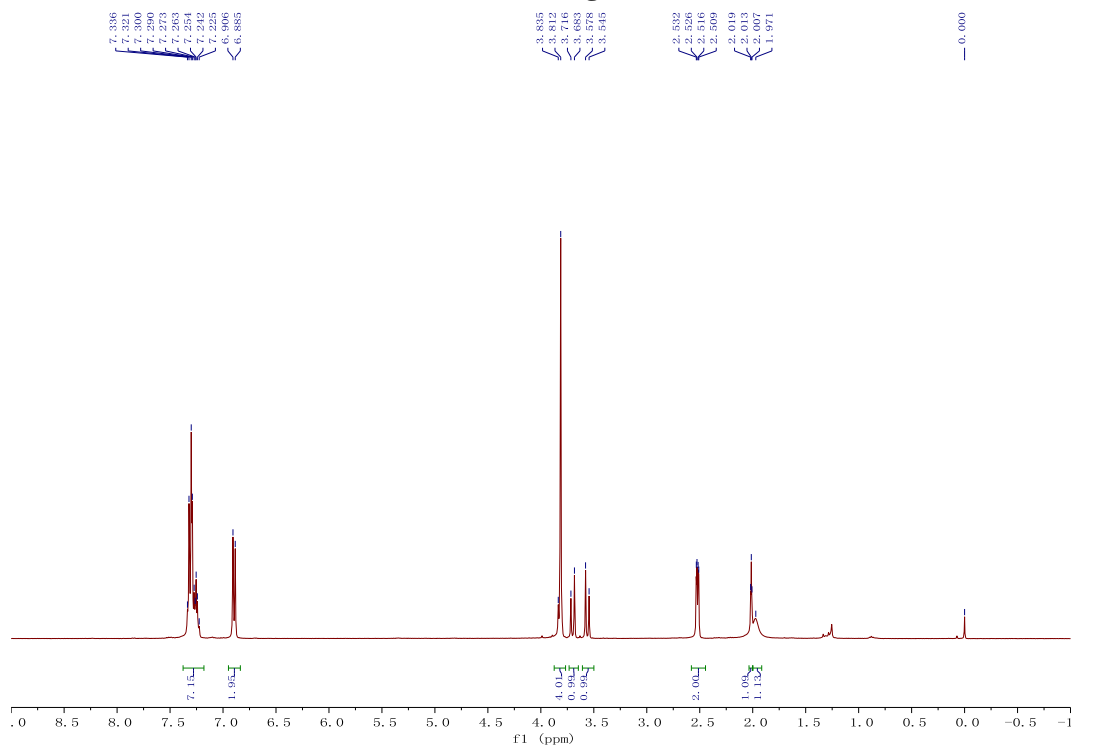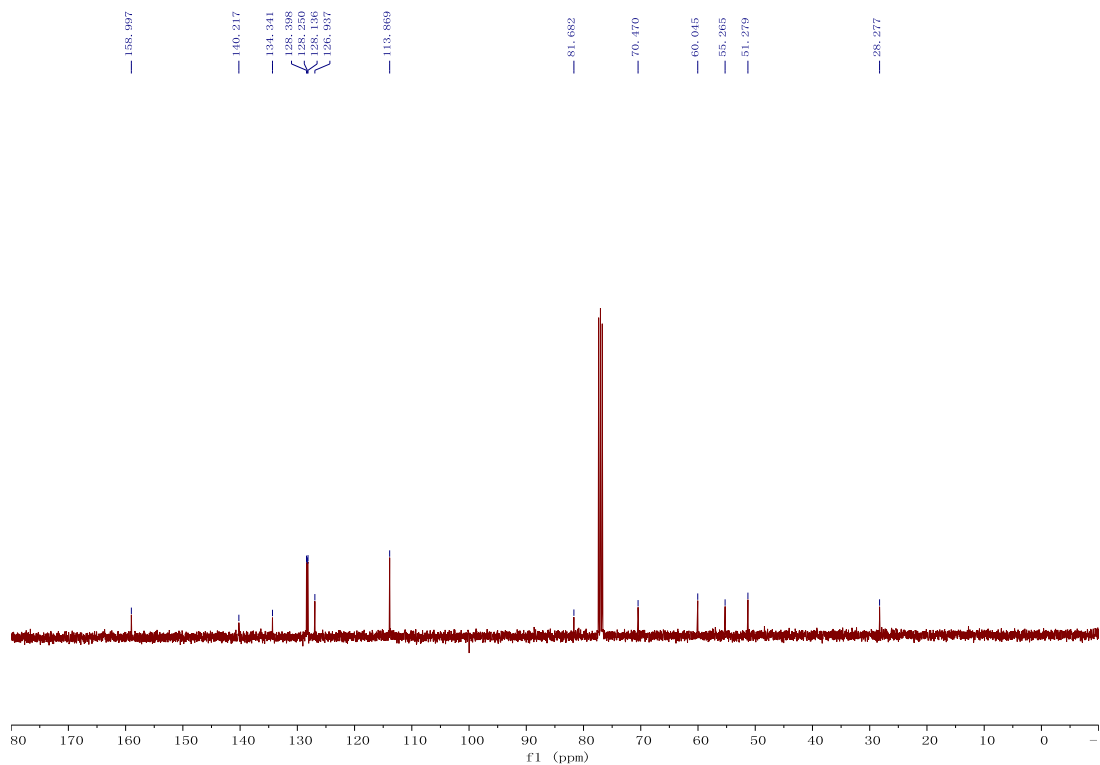

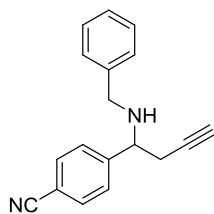

**1h**

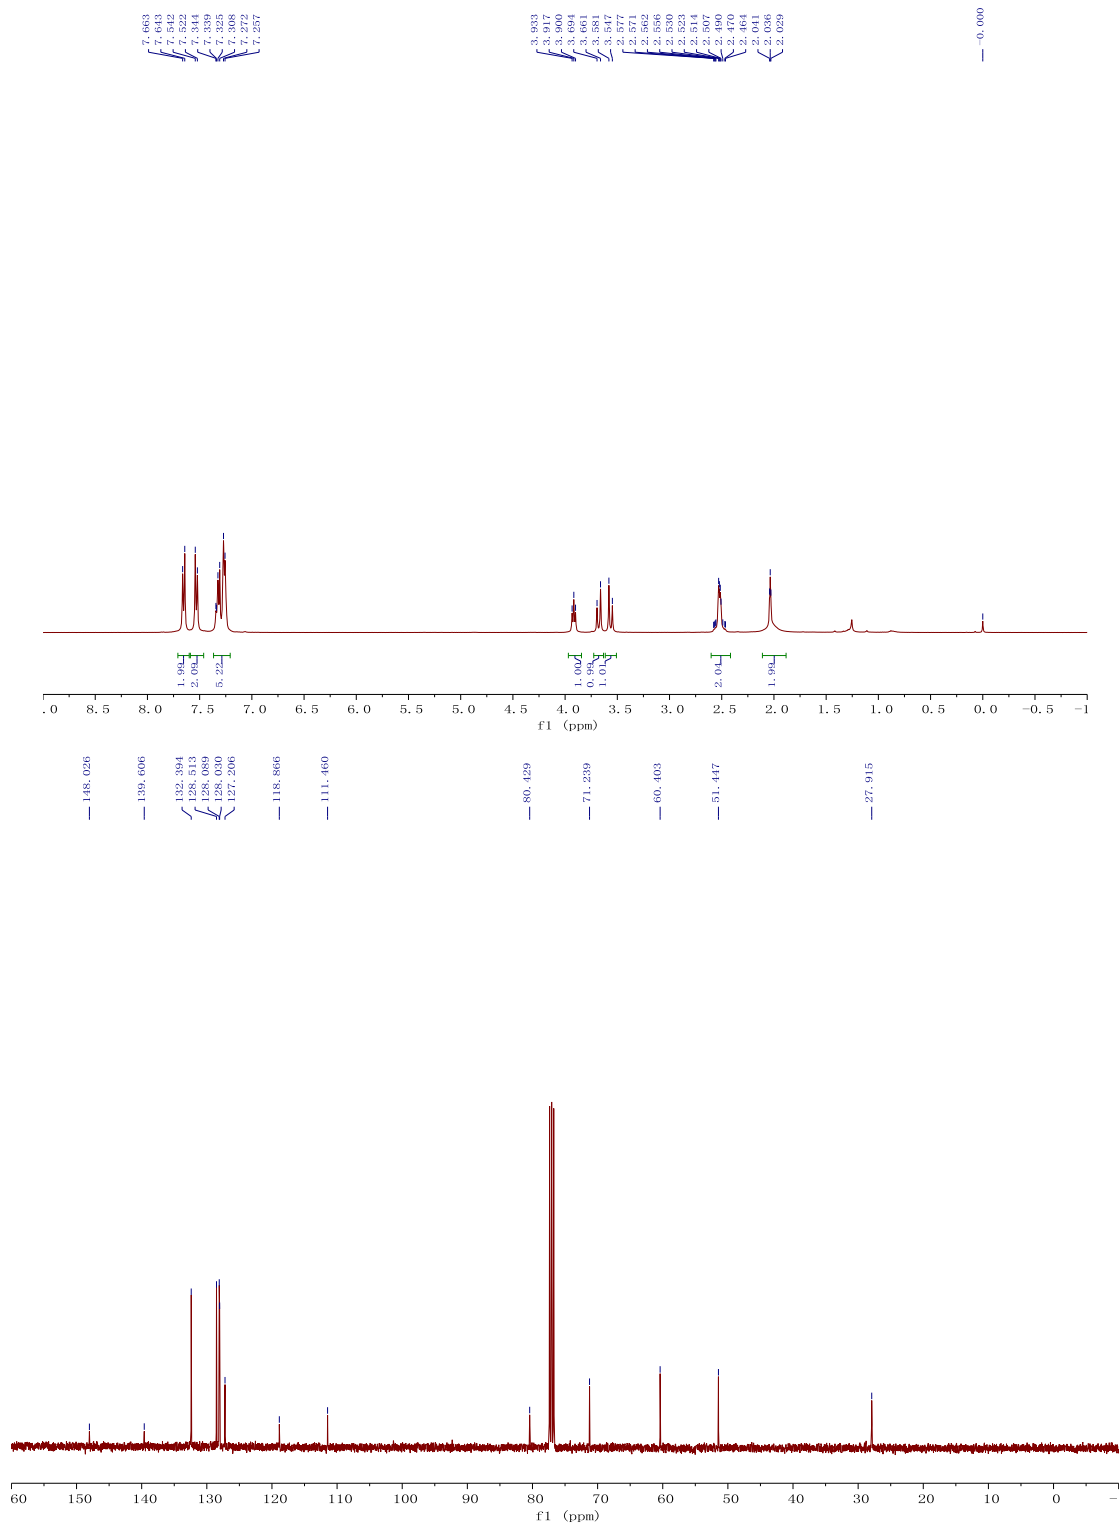

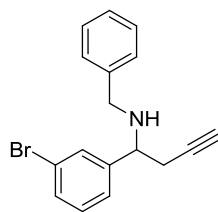

**1i**

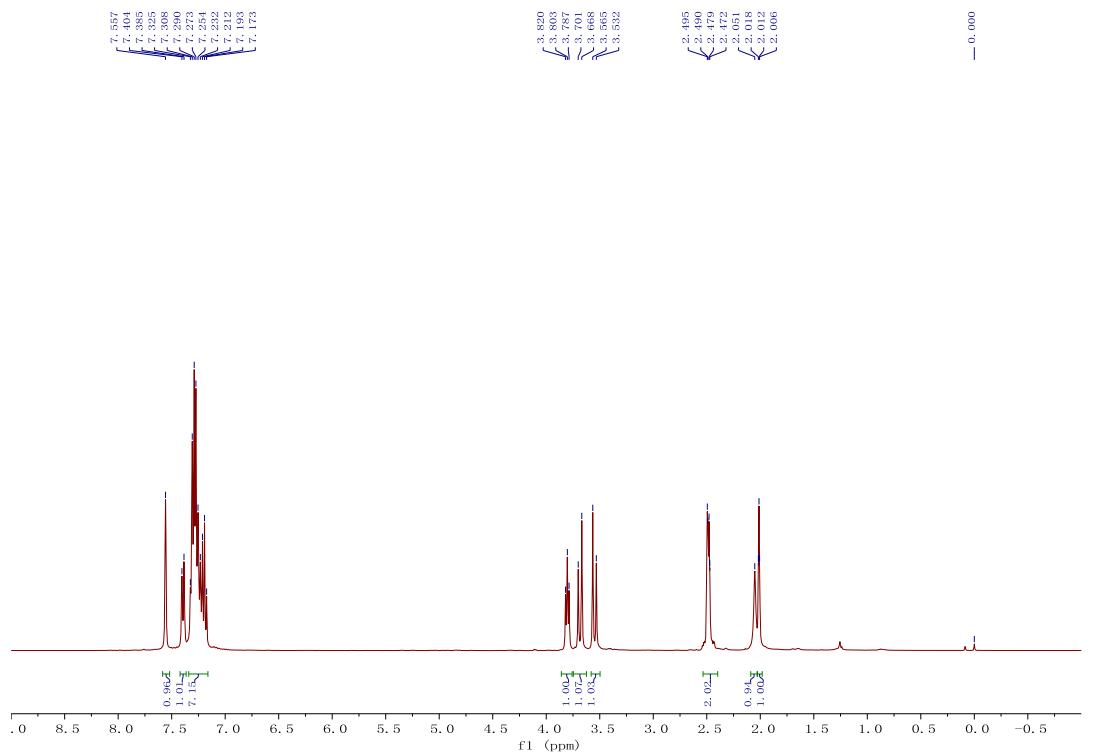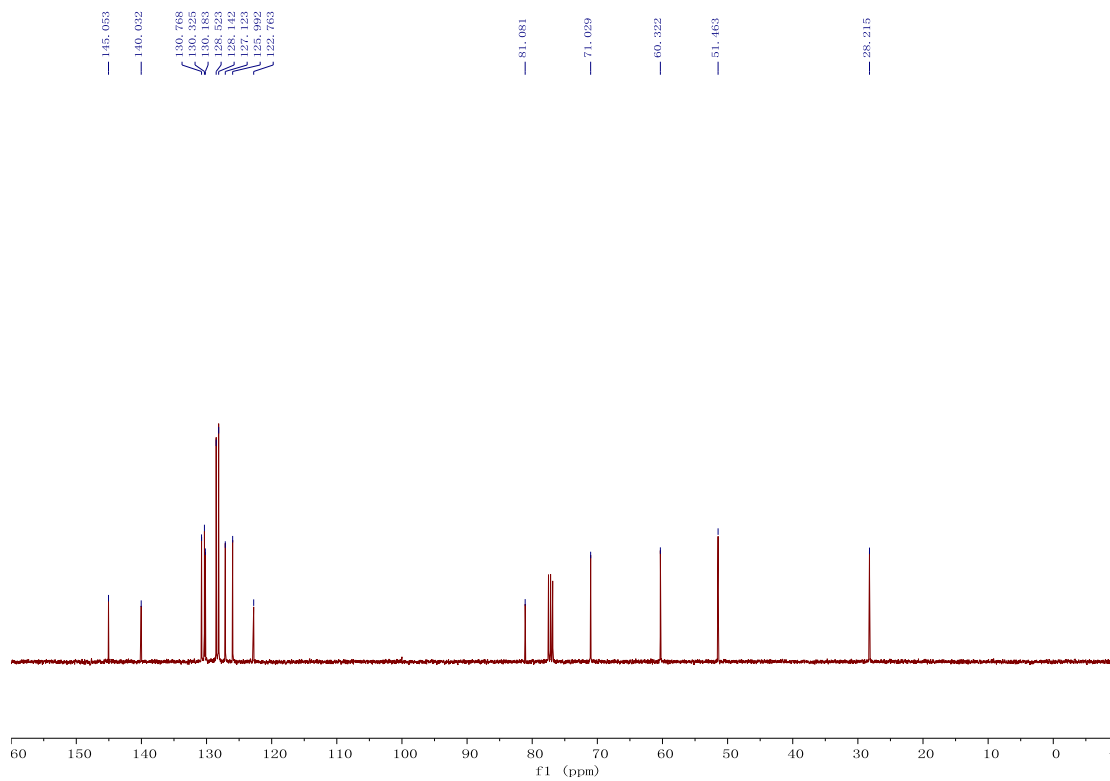

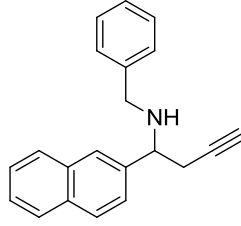

**1j**

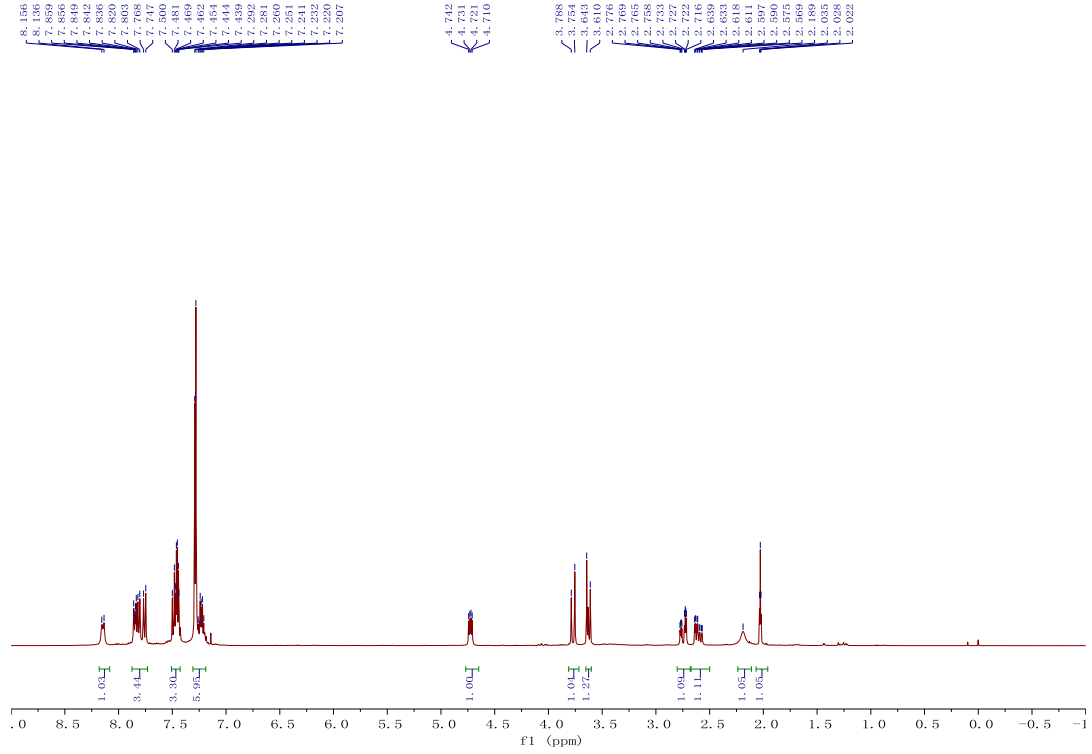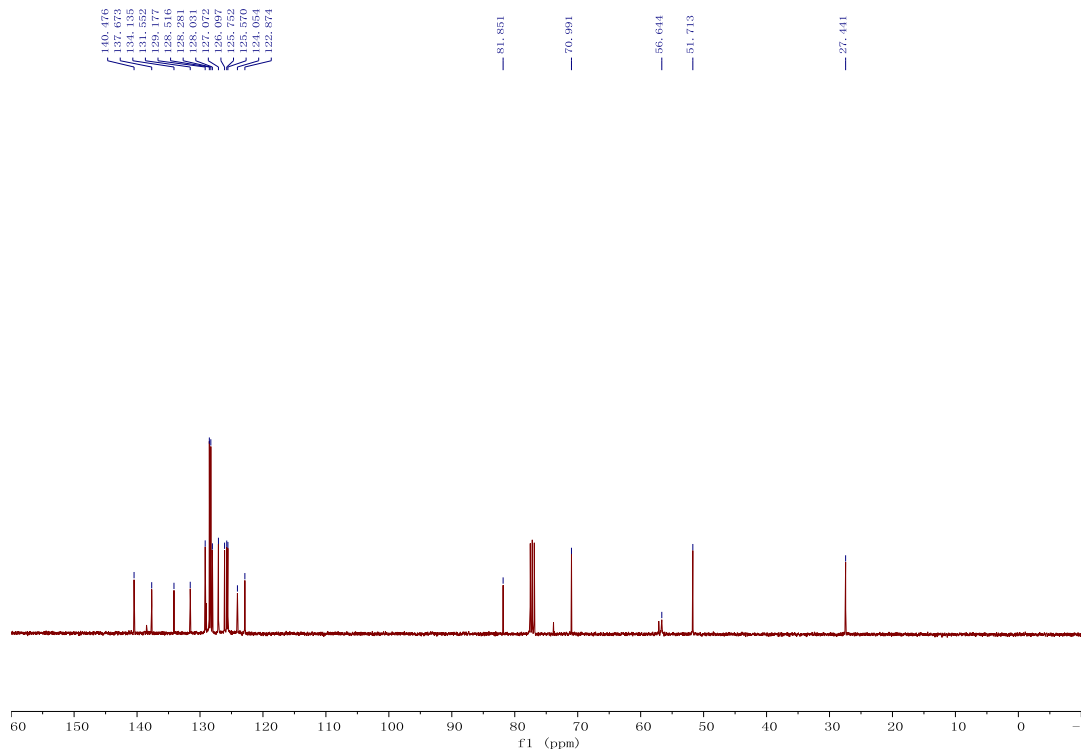

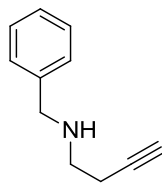

**1k**

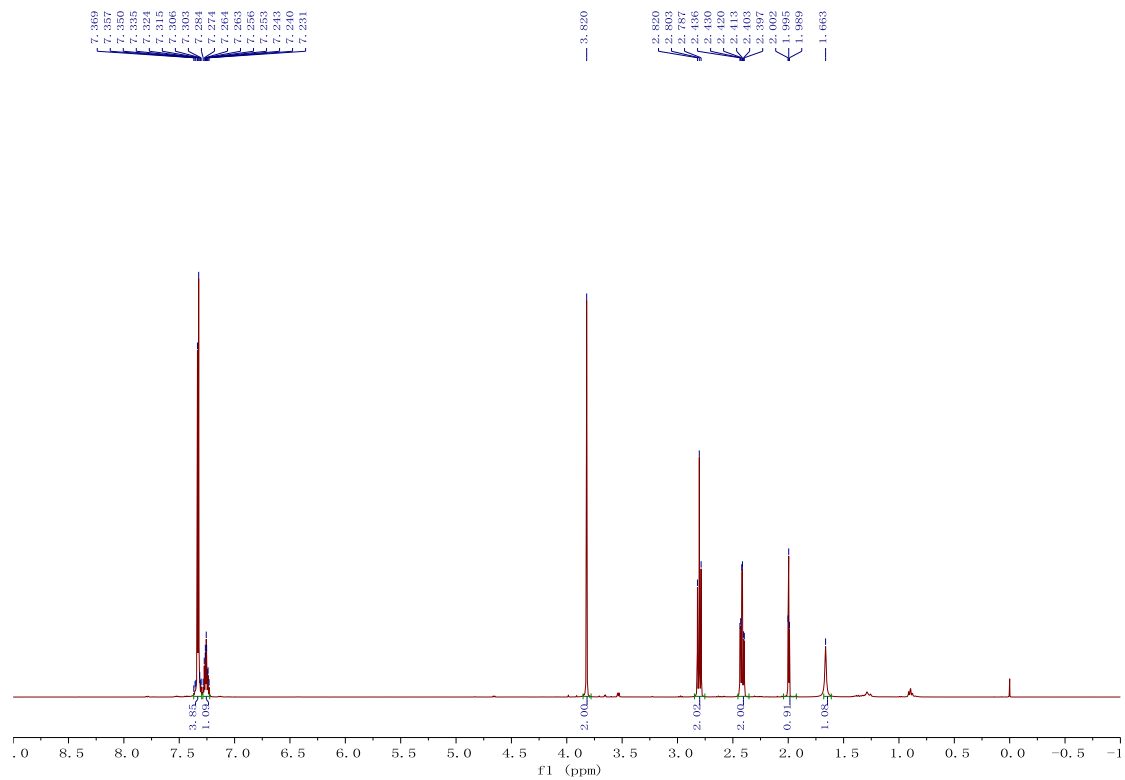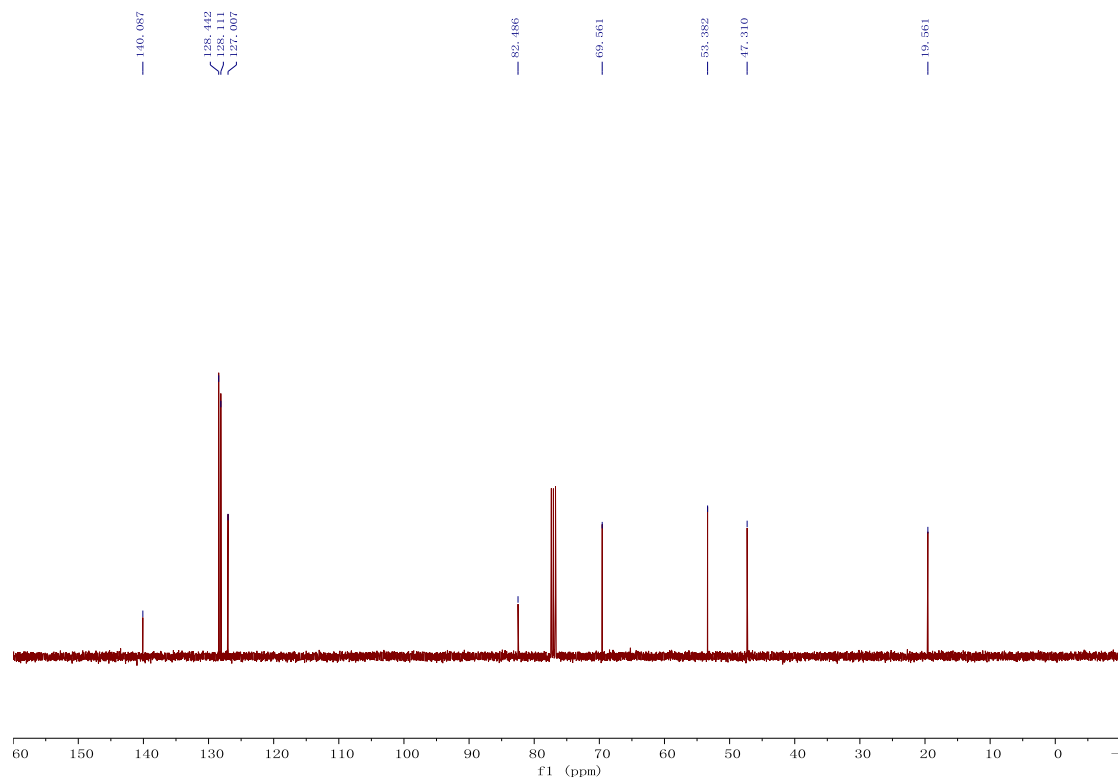



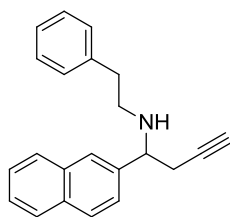

**11**

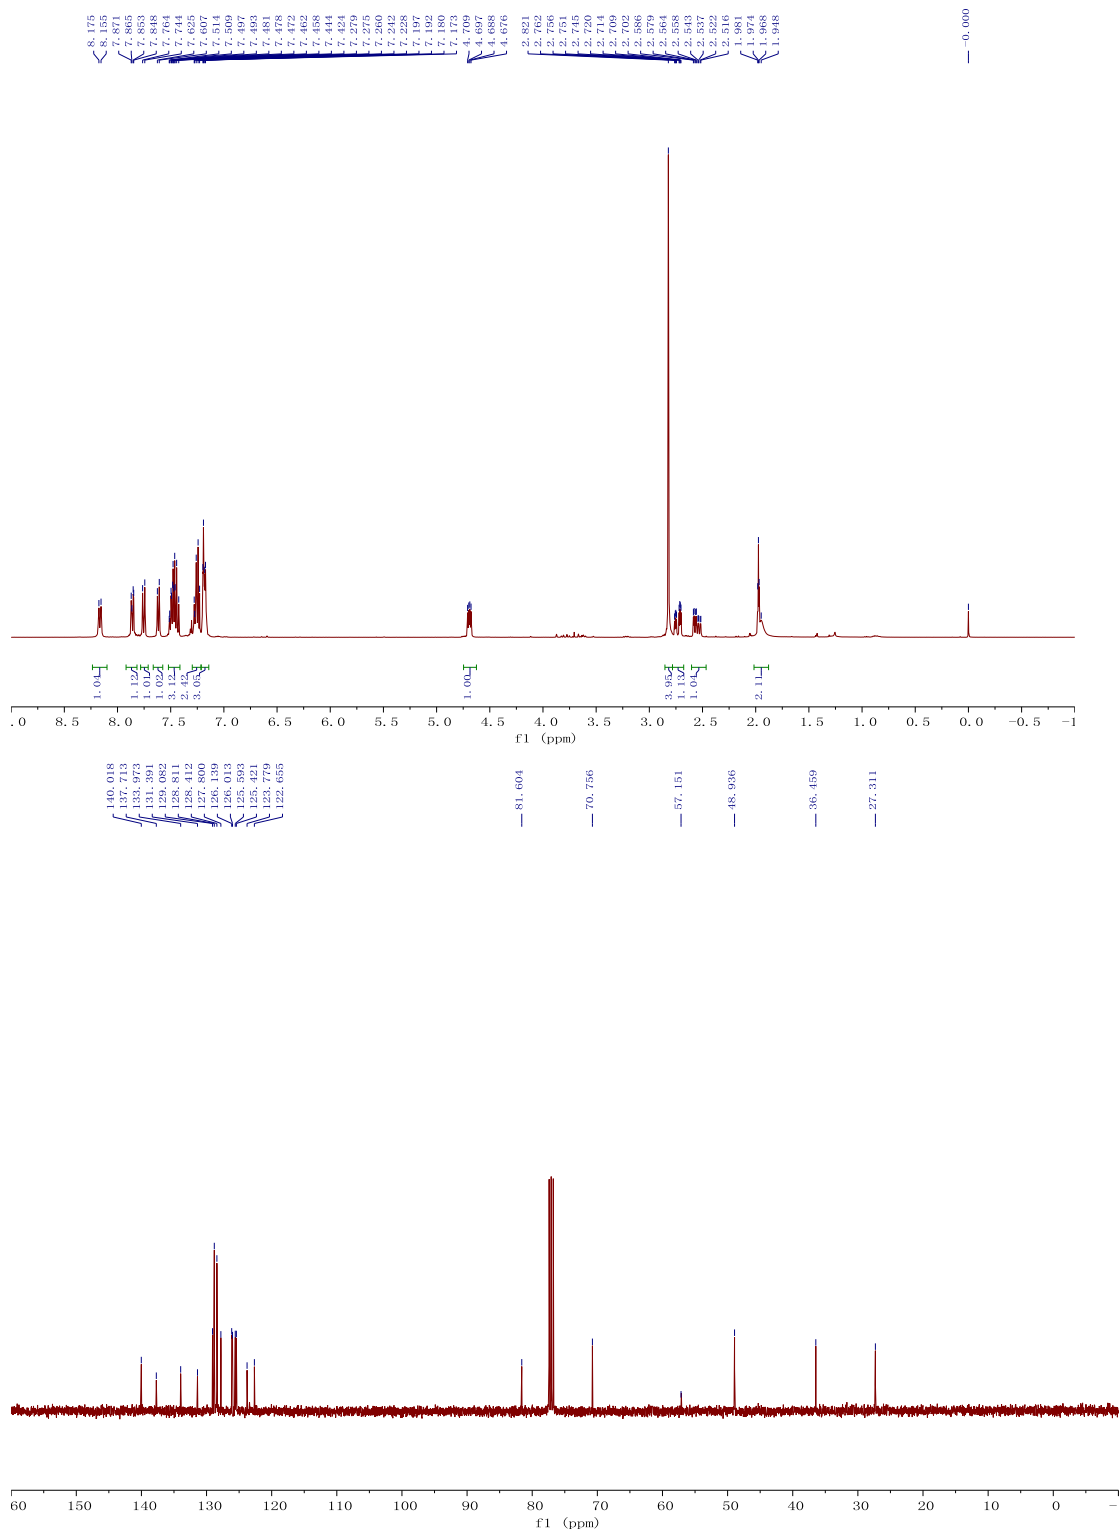

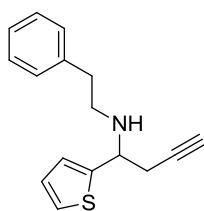

**1m**

7.276  
7.268  
7.264  
7.187  
7.171  
6.925  
6.916  
6.908

4.139  
4.123  
4.107

2.896  
2.886  
2.842  
2.818  
2.791  
2.597  
2.572

1.972  
1.894

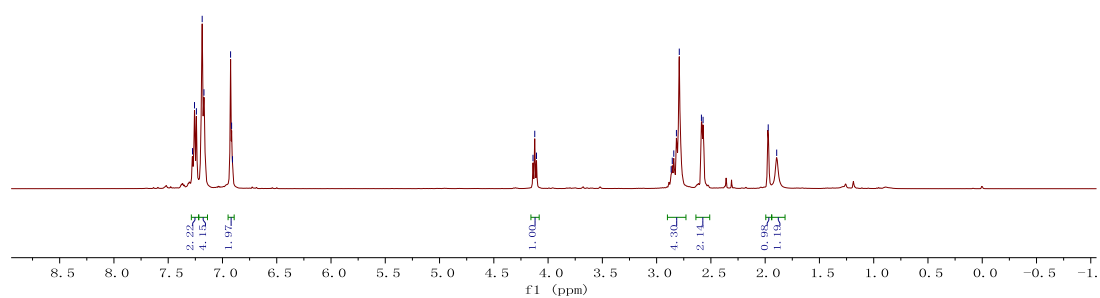

147.402  
139.573  
128.814  
128.411  
128.171  
126.205  
124.451  
124.418

80.907

71.109

57.165

48.663

36.273

28.597

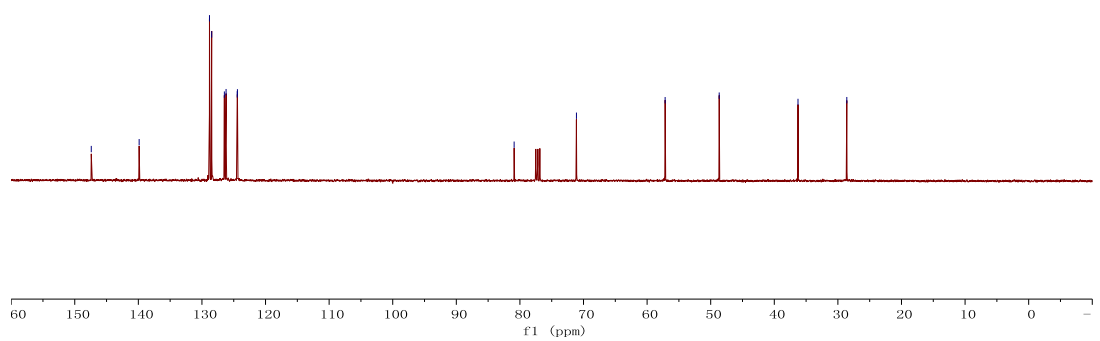

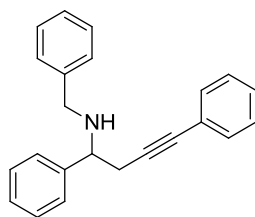

**1n**

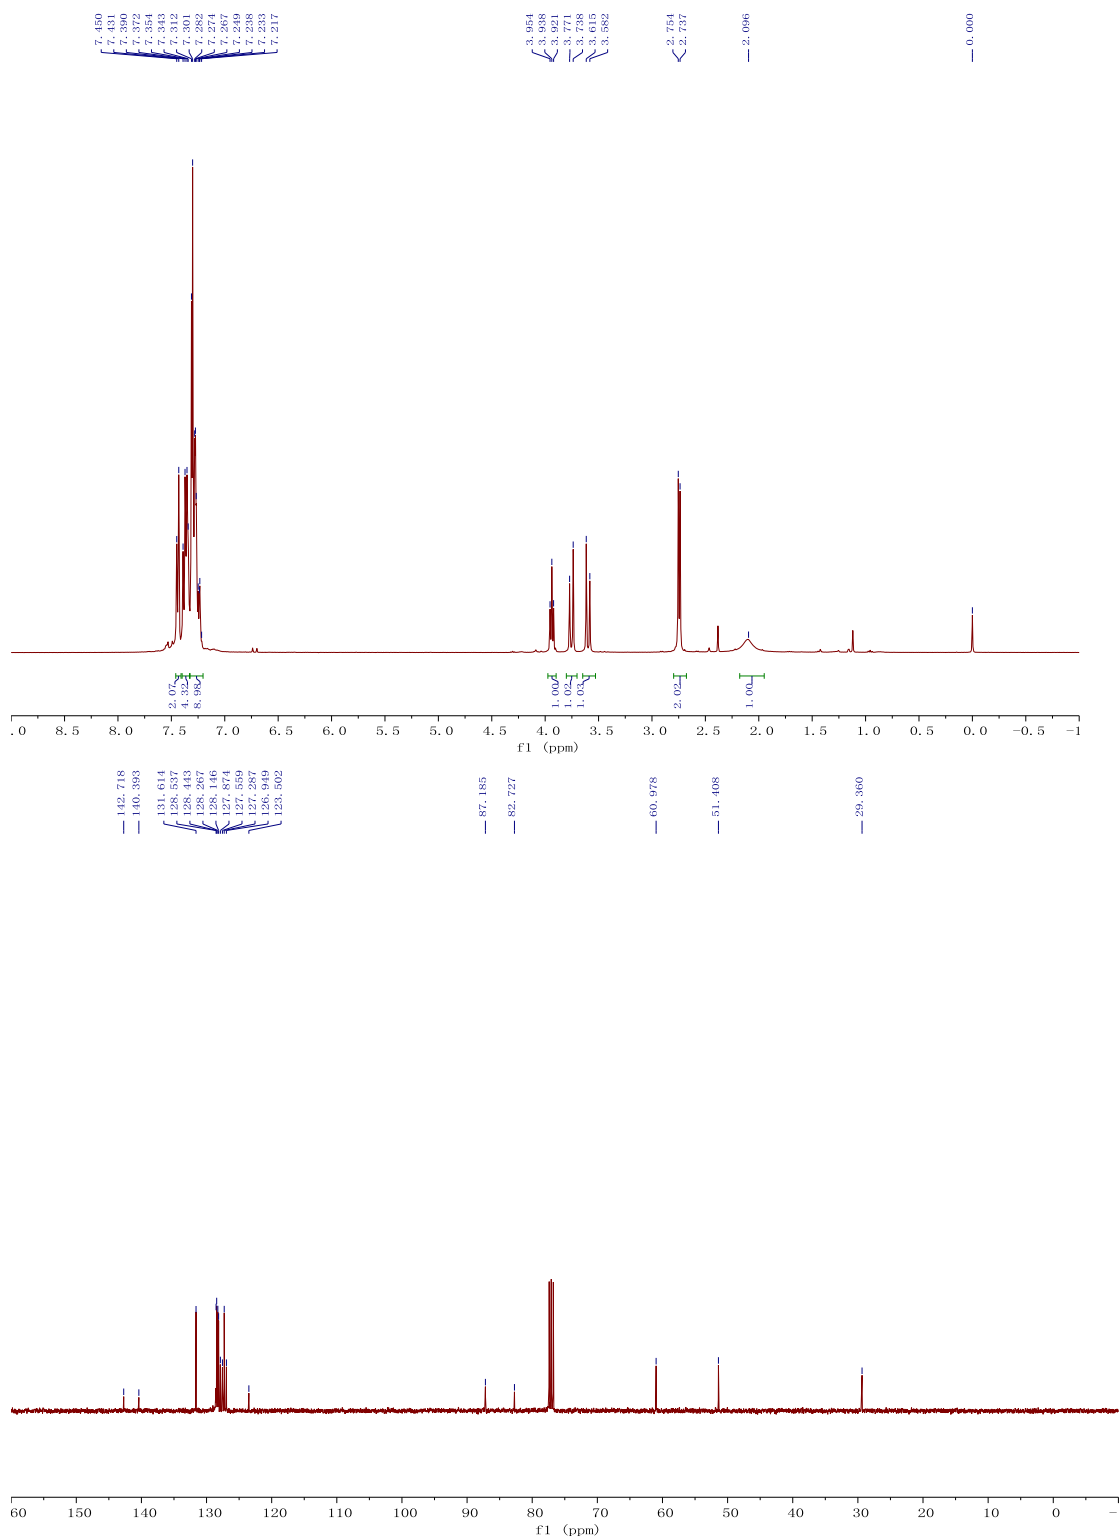

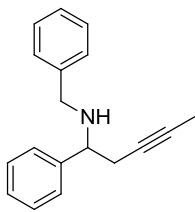

**1o**

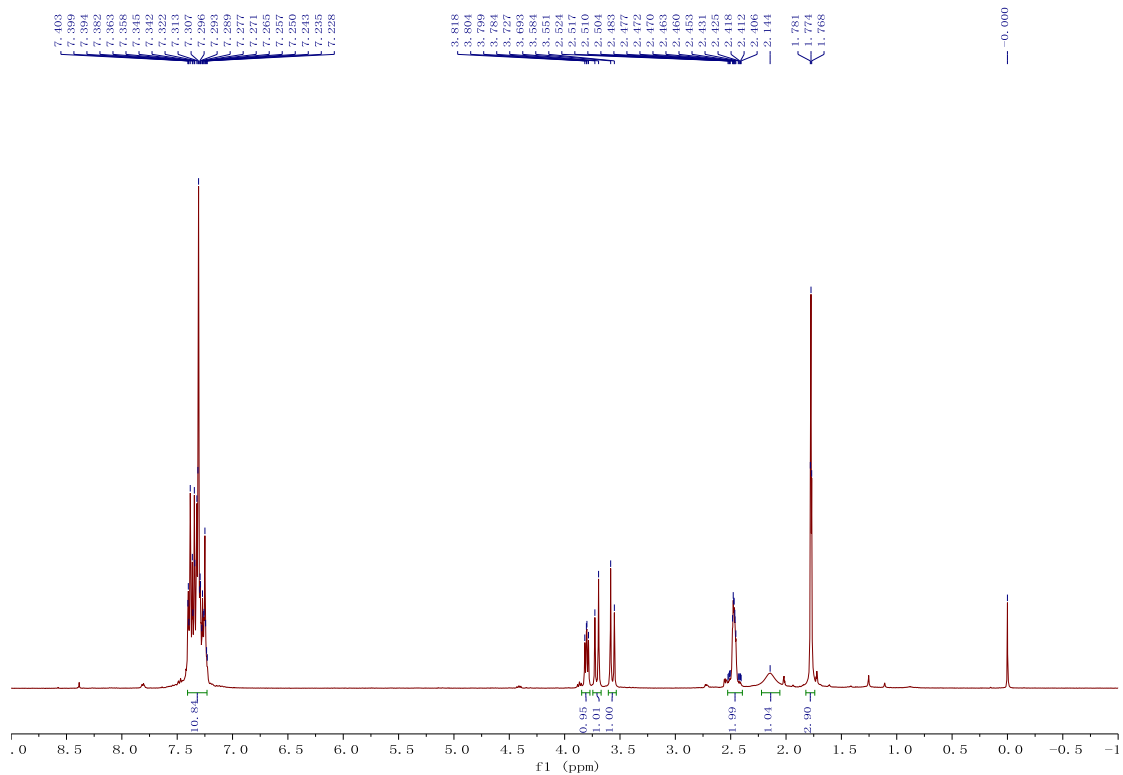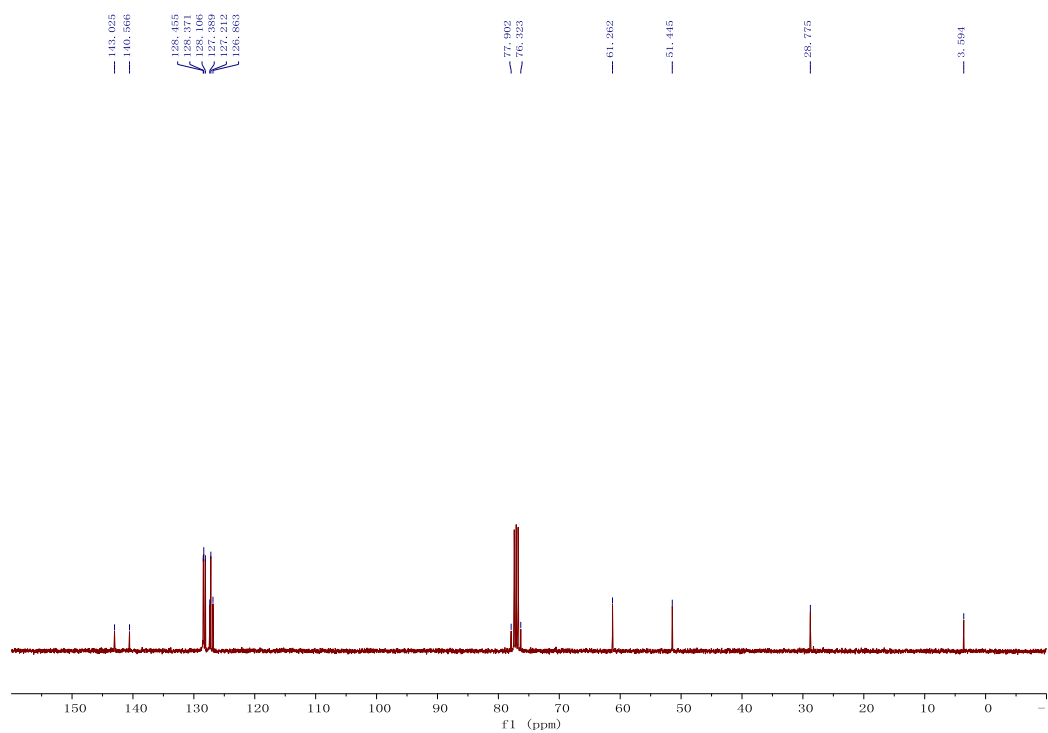

## 8. The spectra of 1, 3-oxazin-2-ones 2a

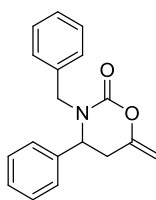

**2a**

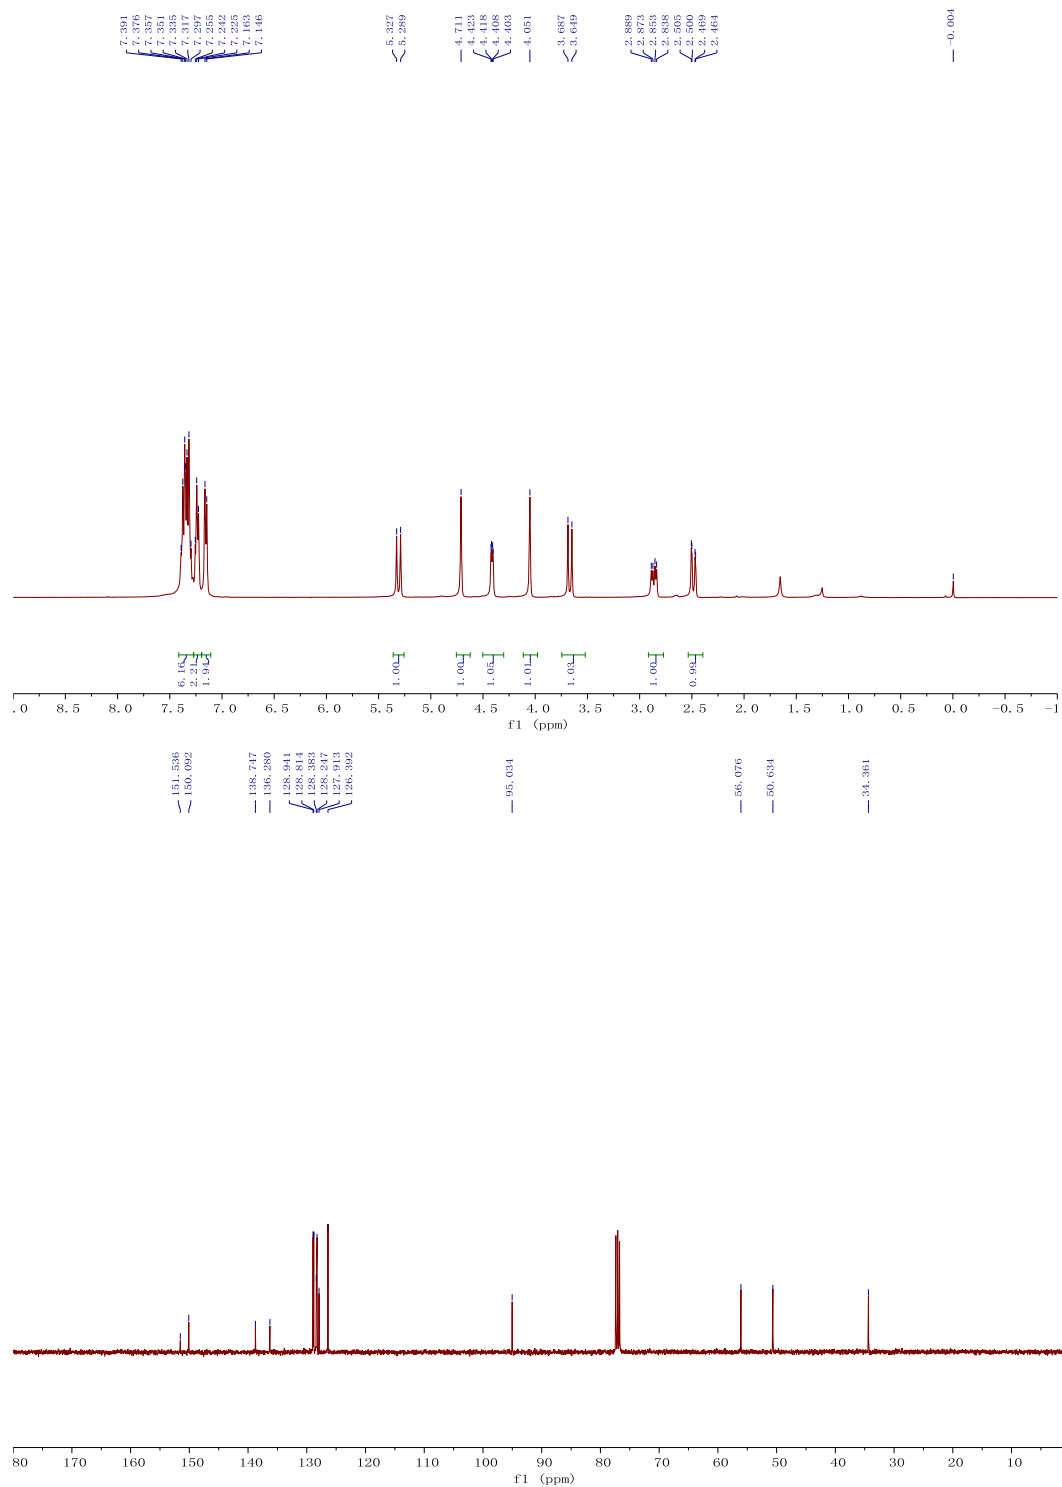

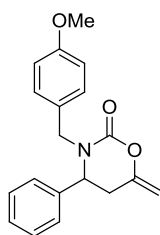

**2b**

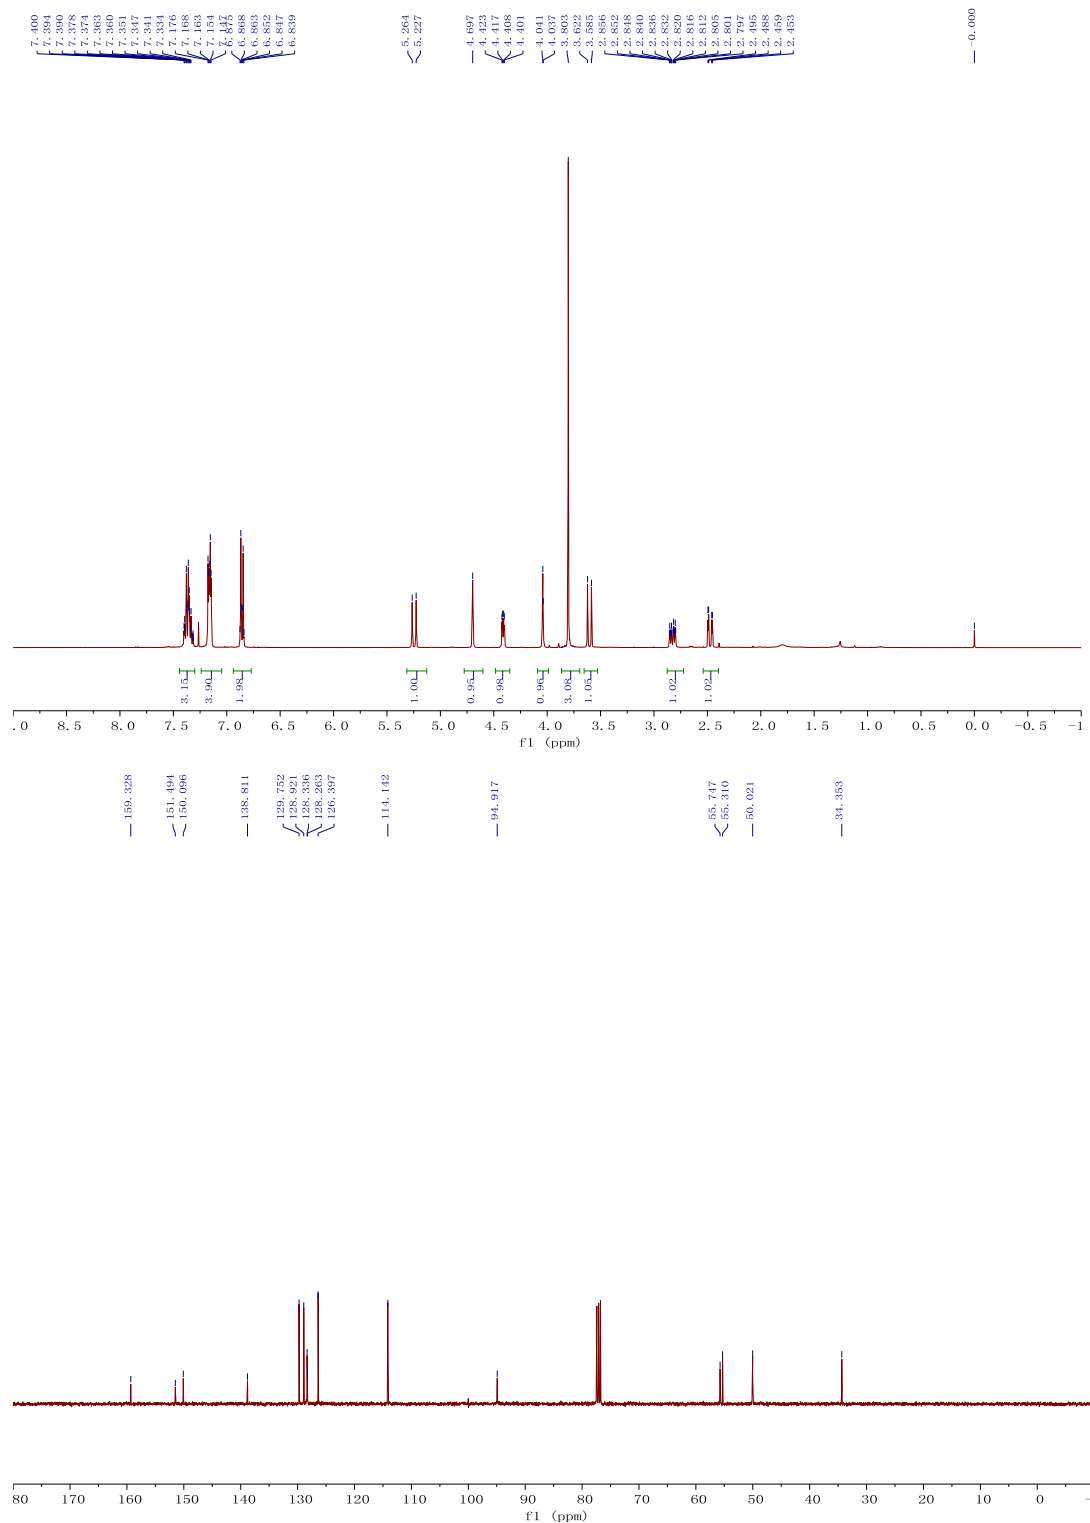

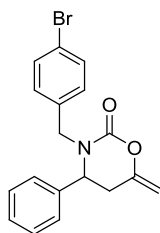

**2c**

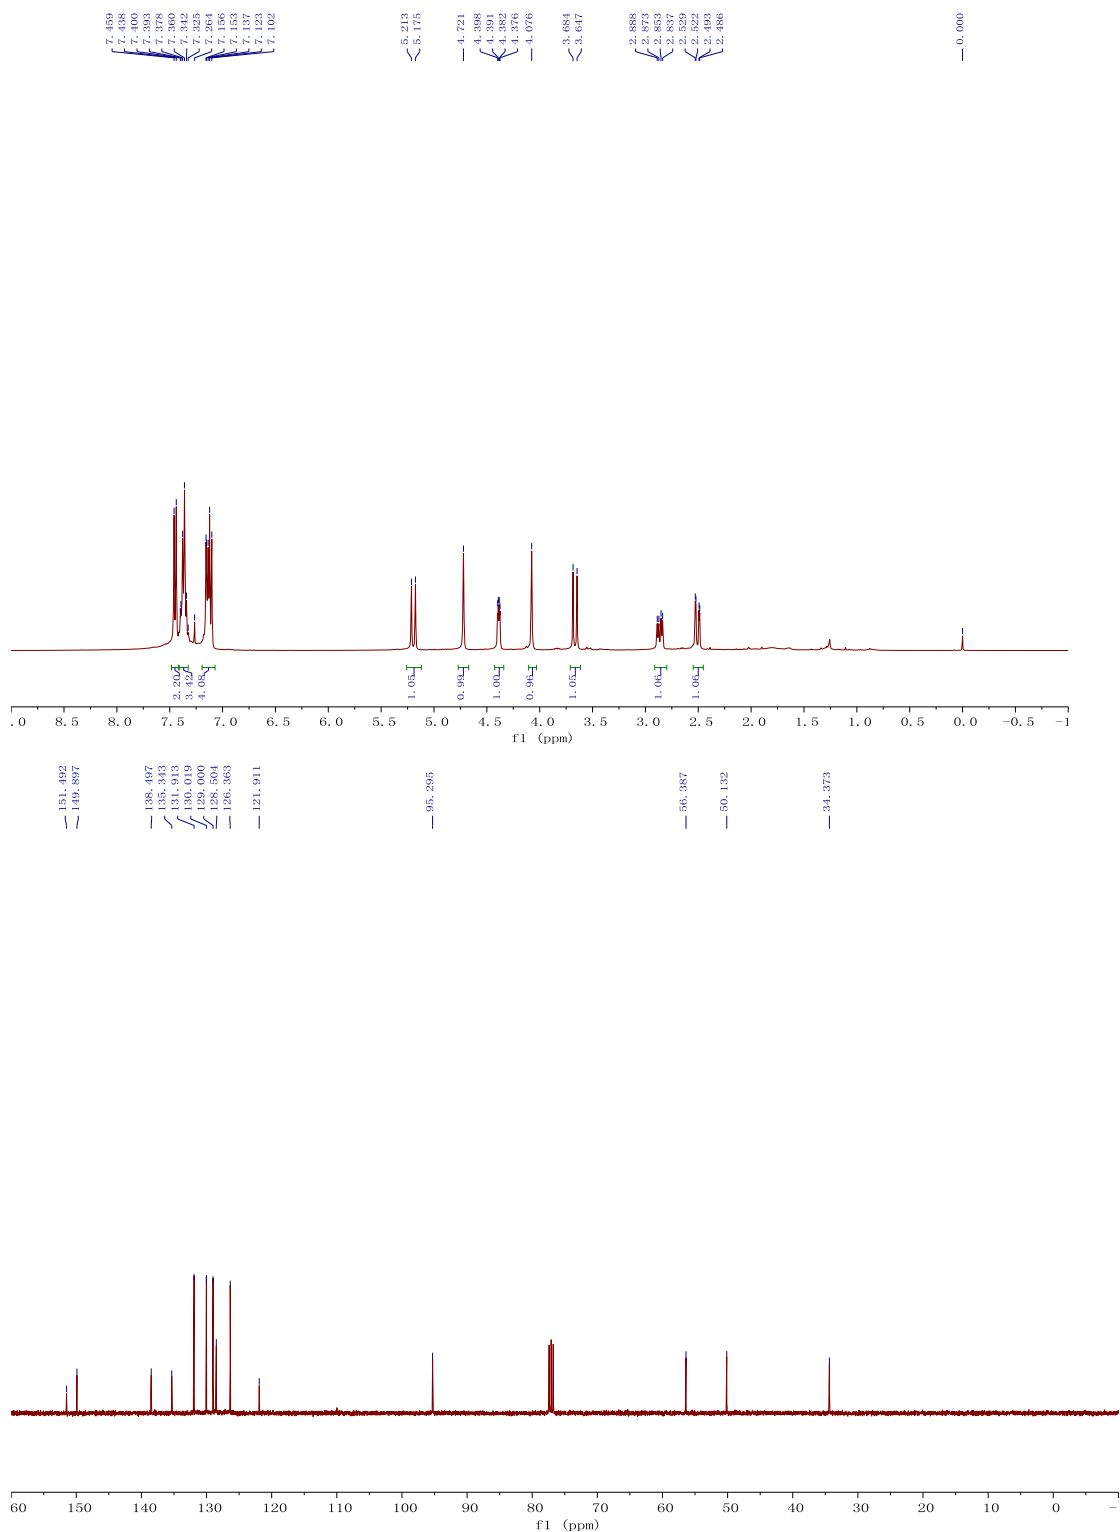

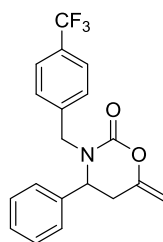

**2d**

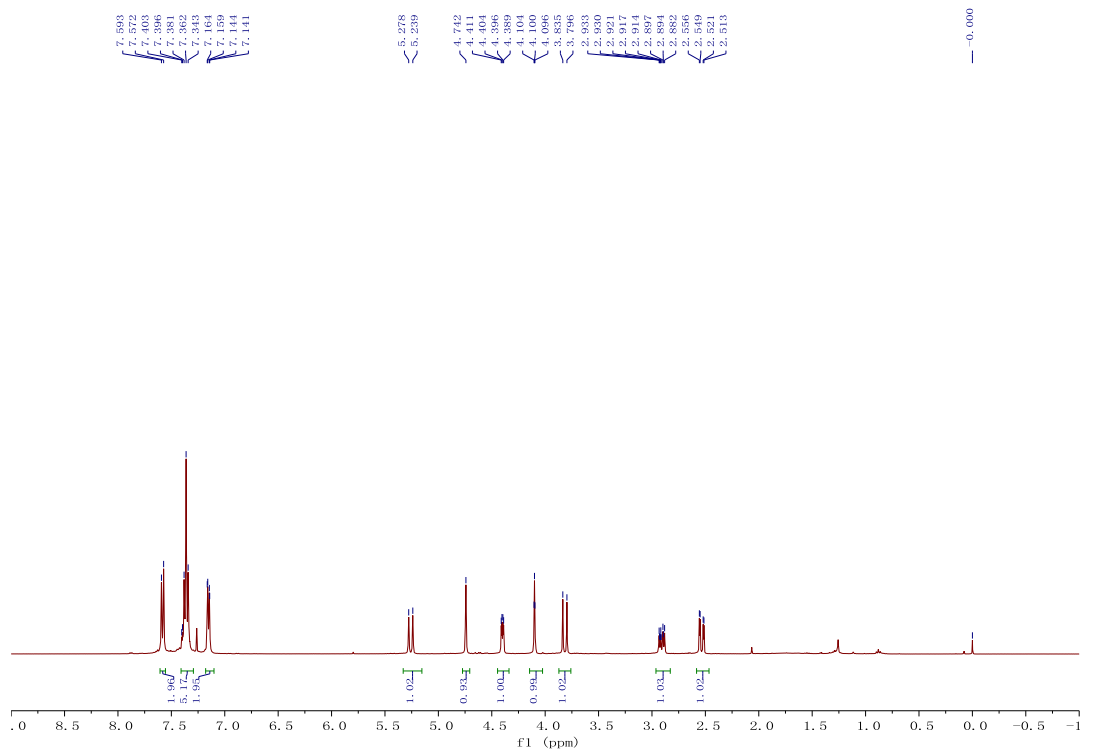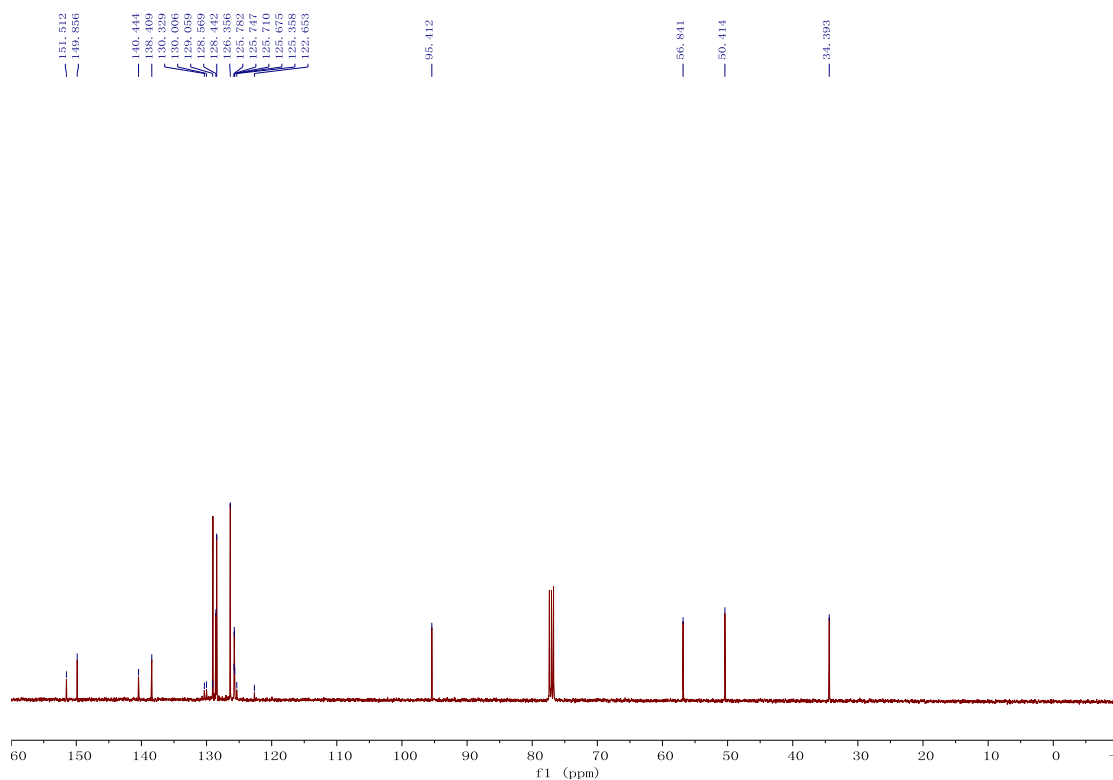



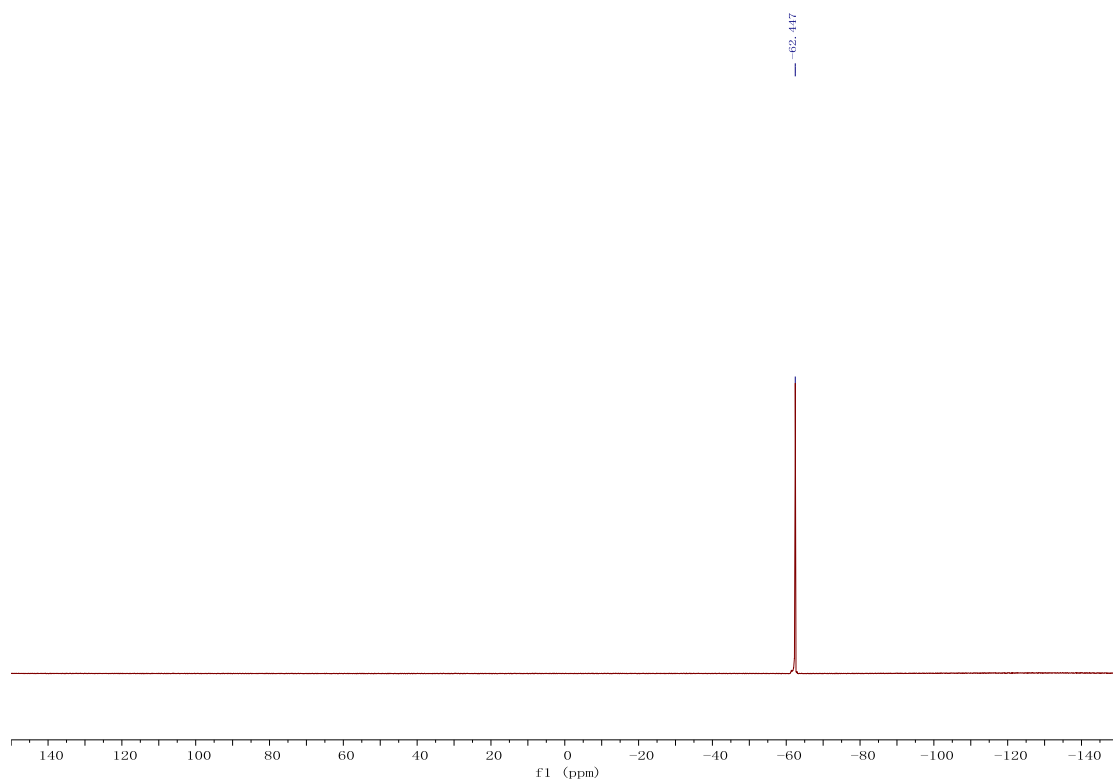

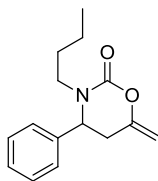

**2e**

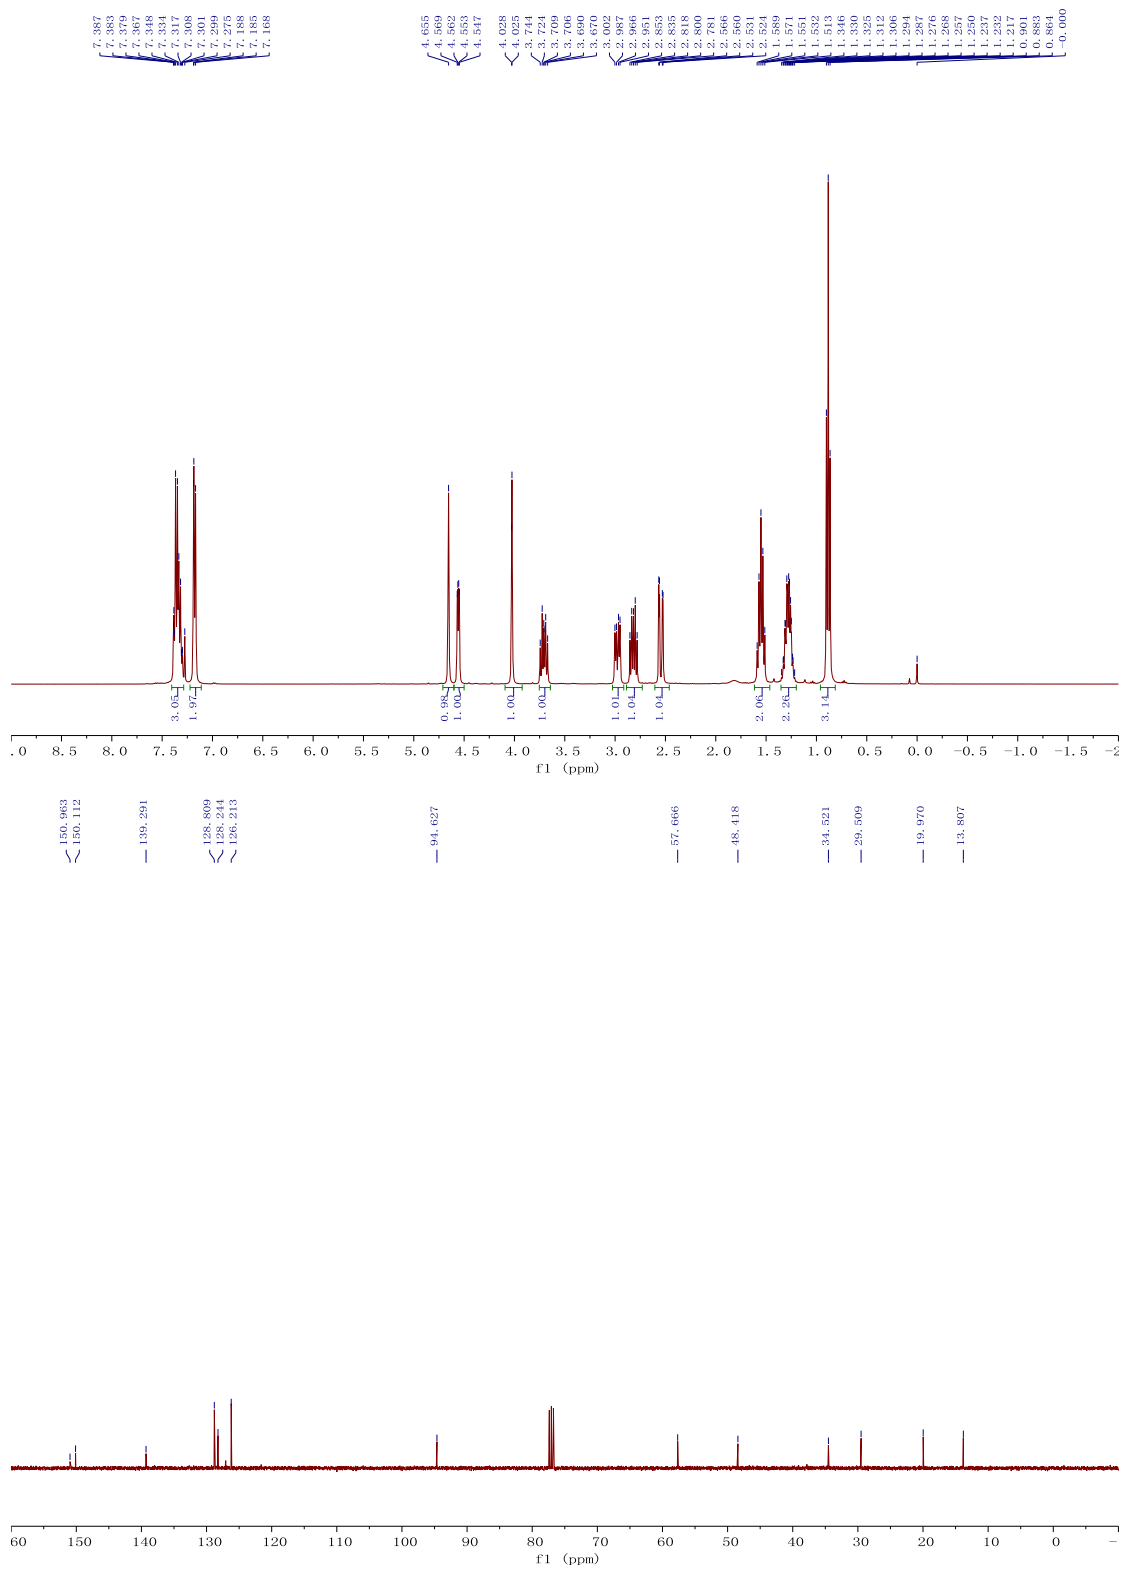

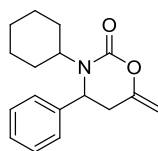

**2f**

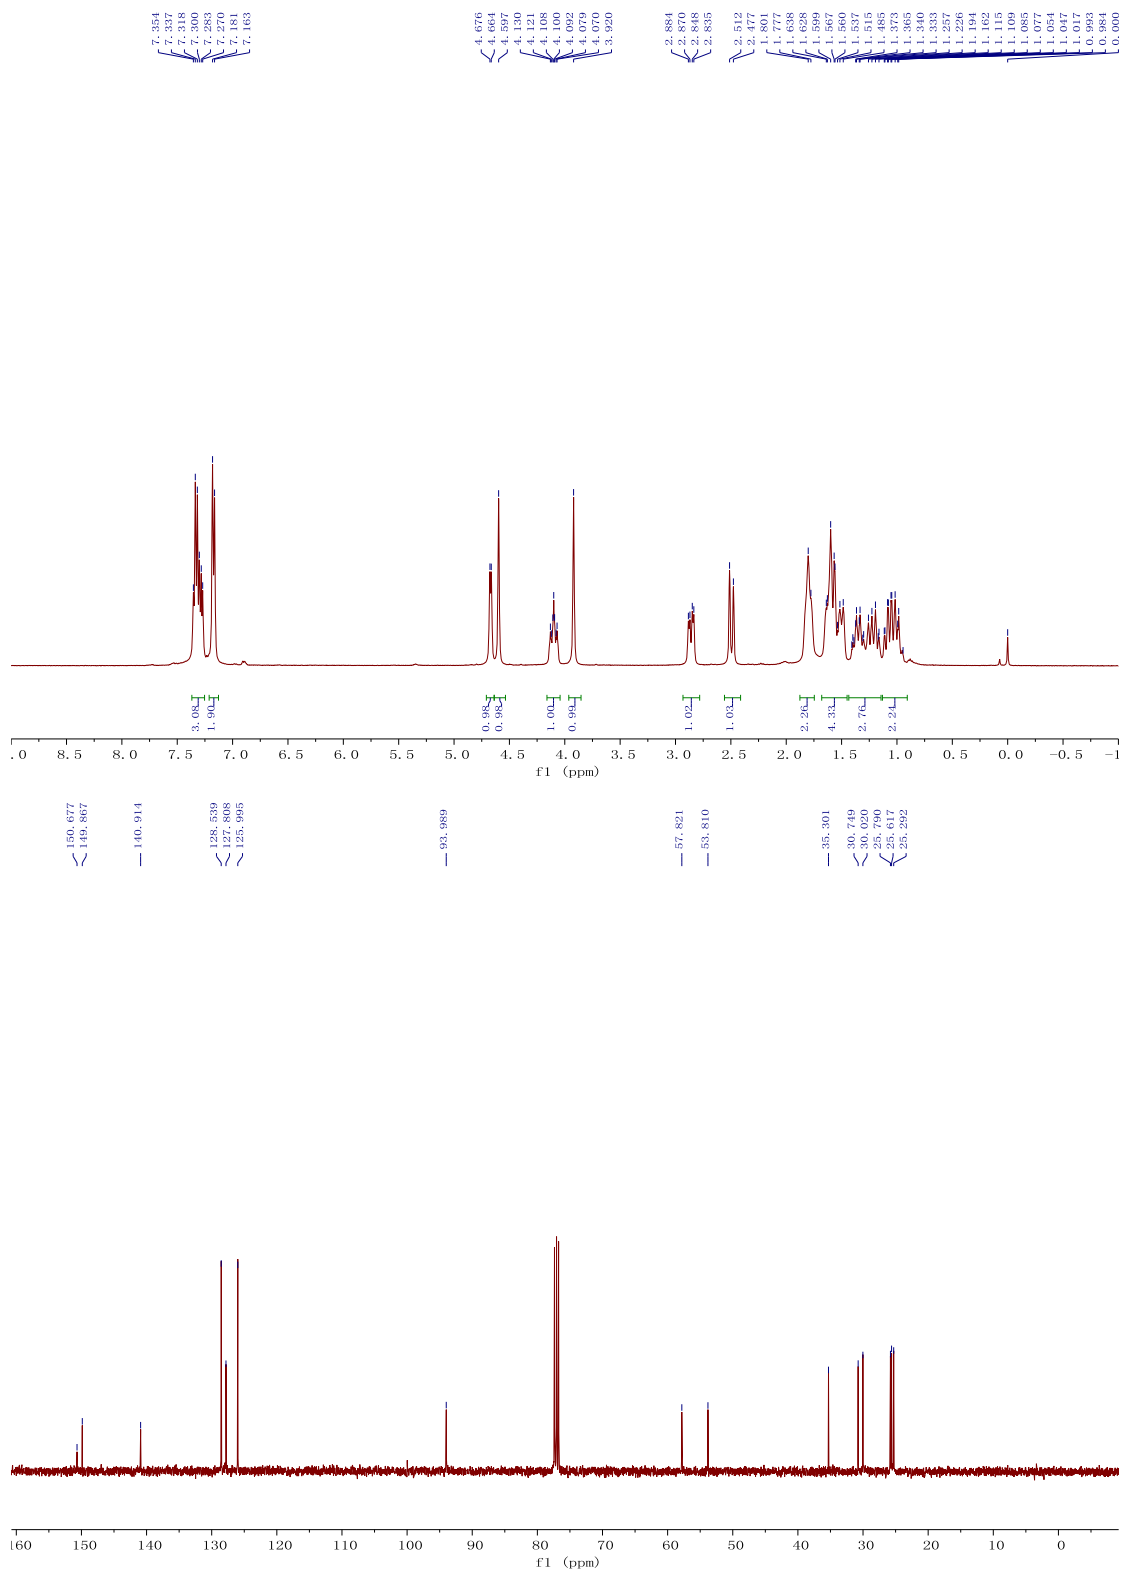

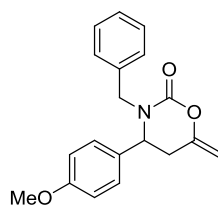

2g

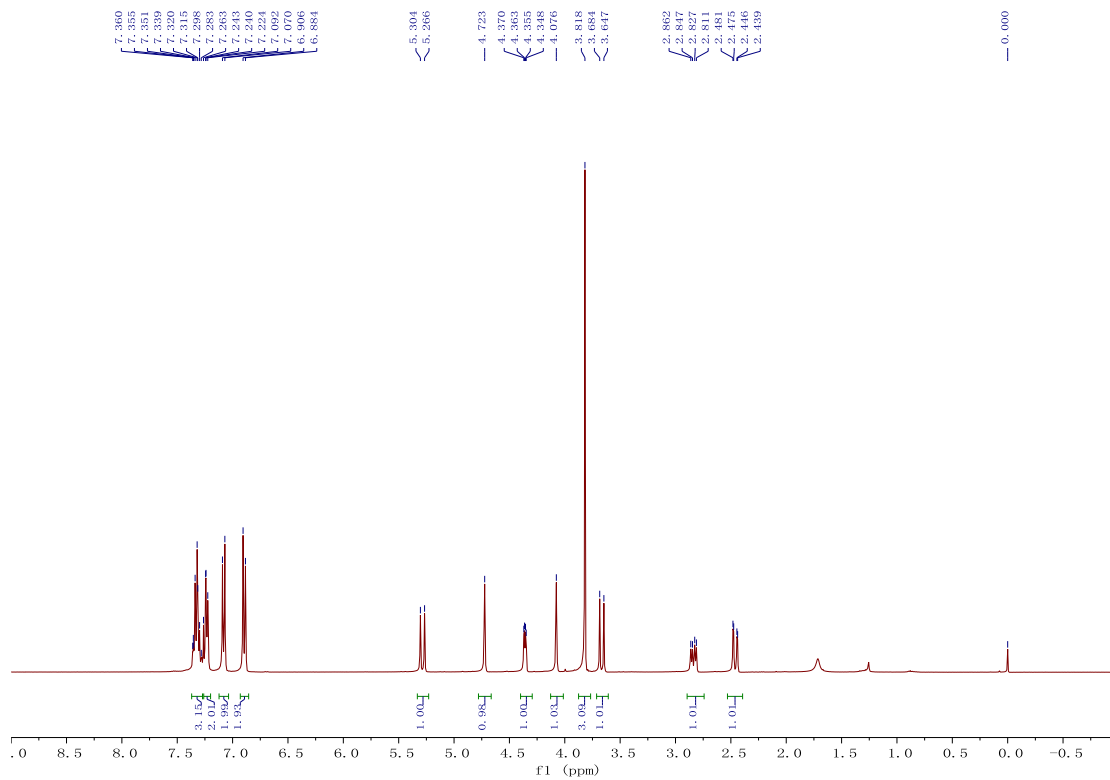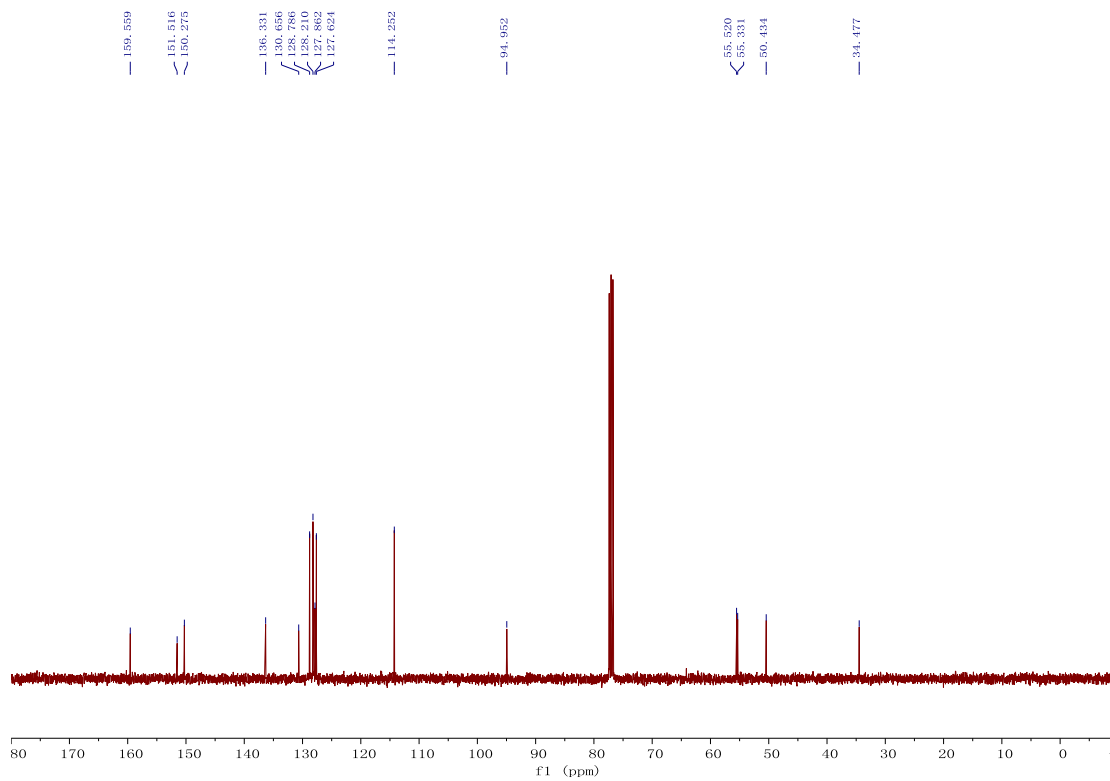

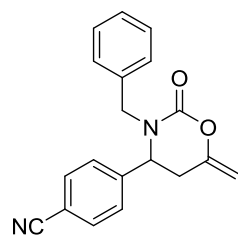

2h

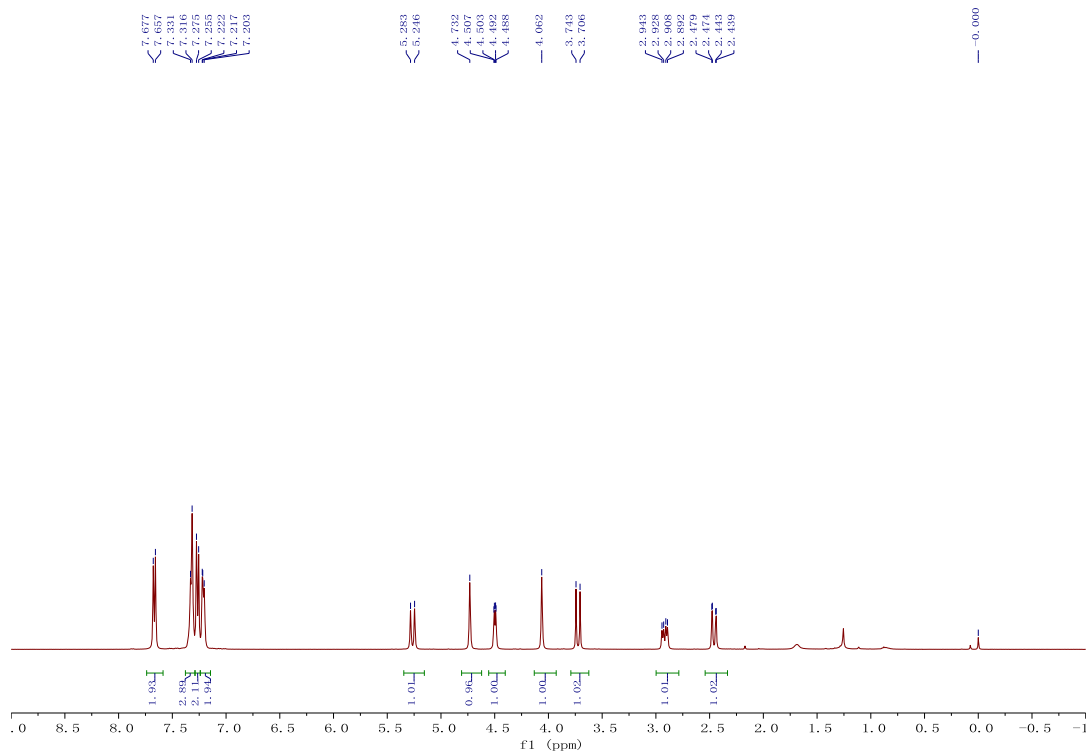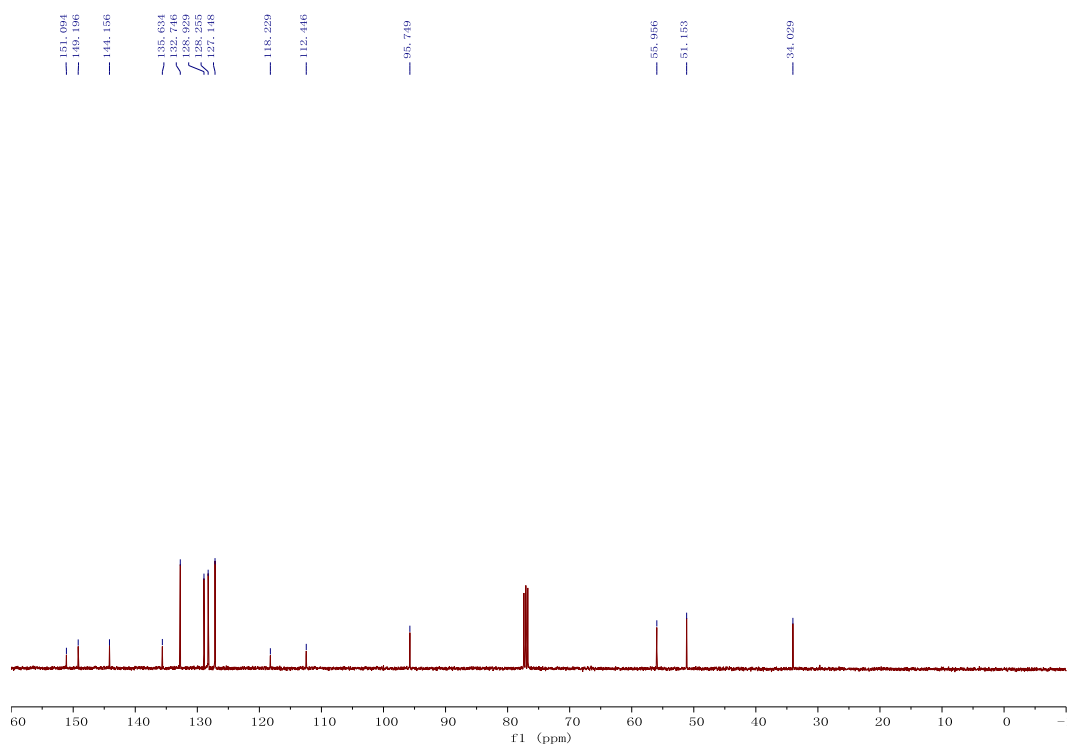

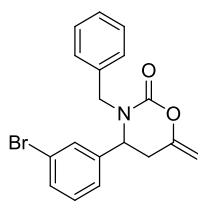

**2i**

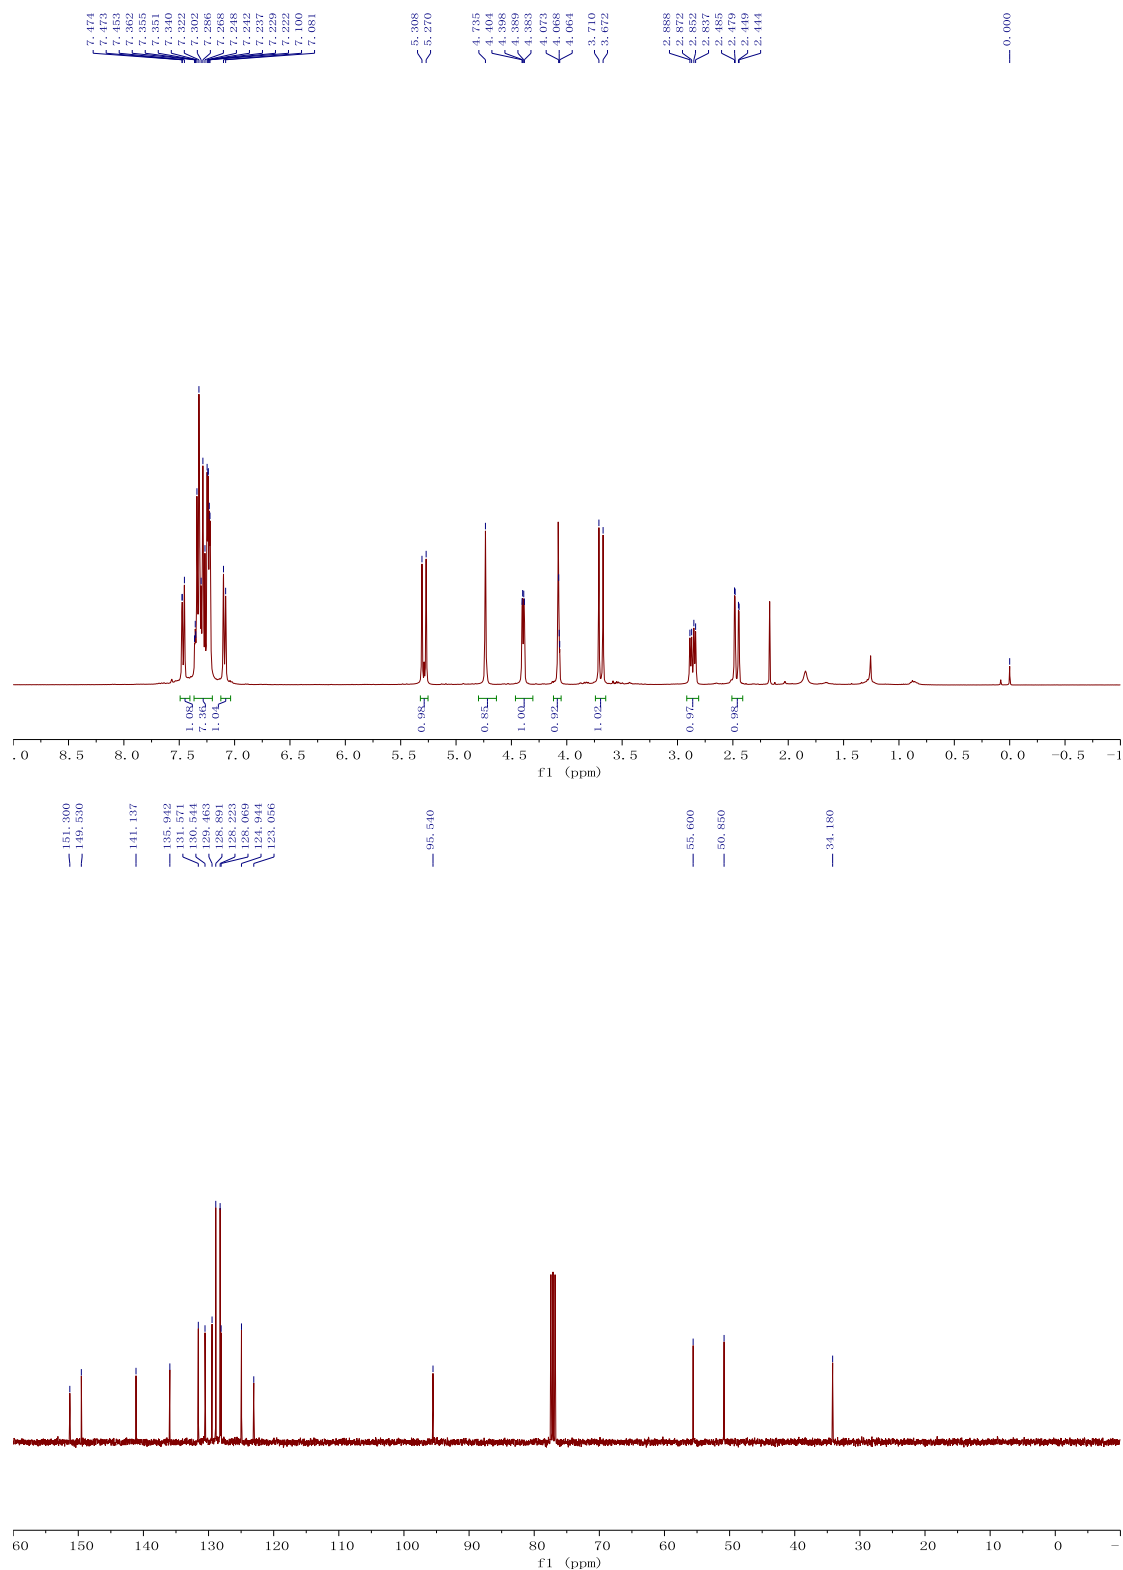

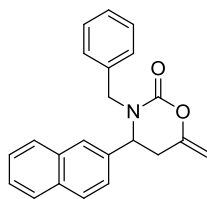

2j

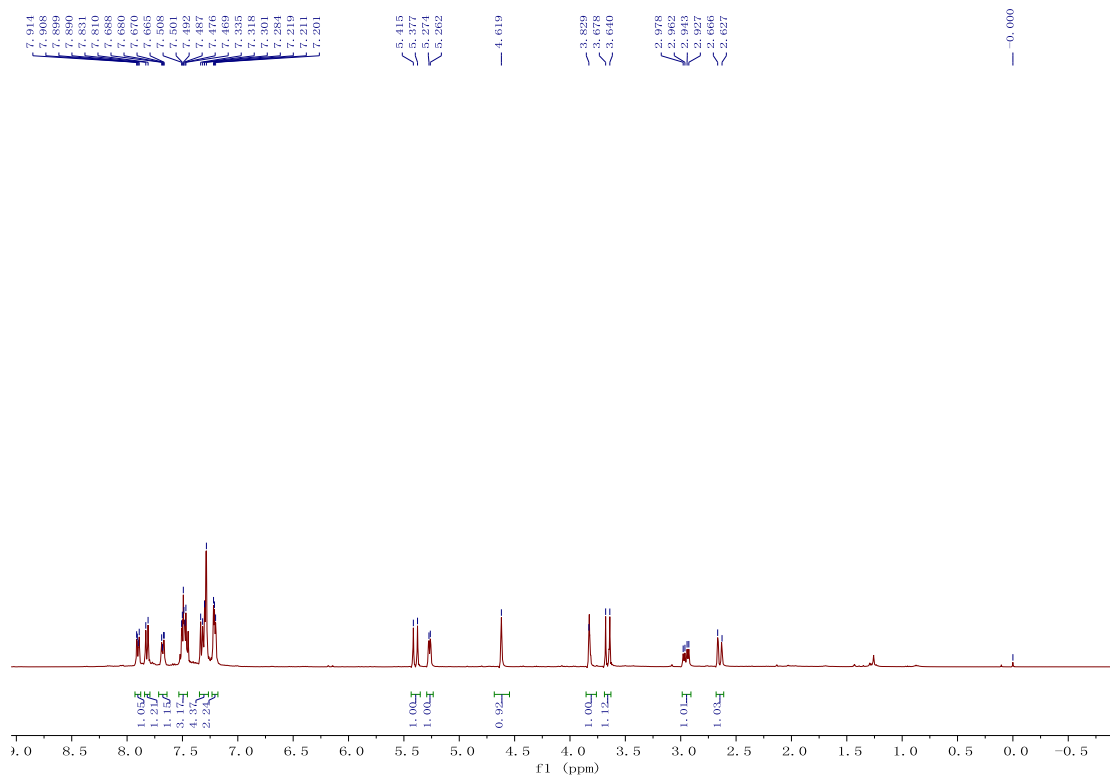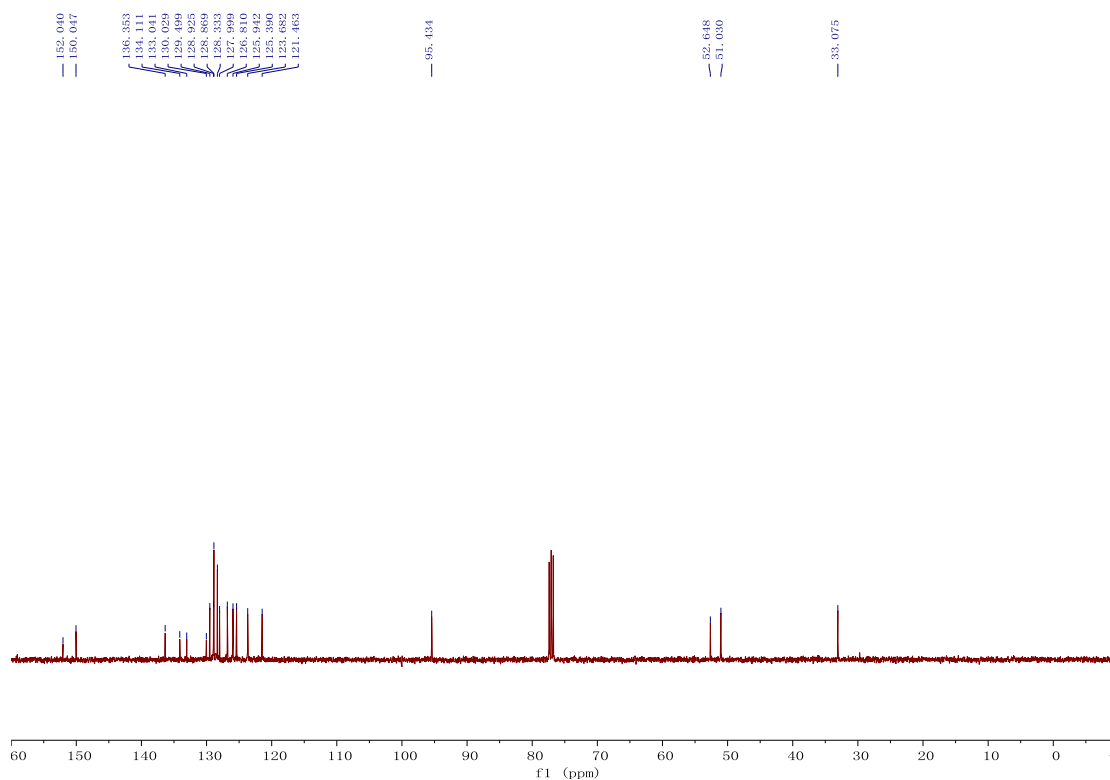

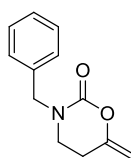

**2k**

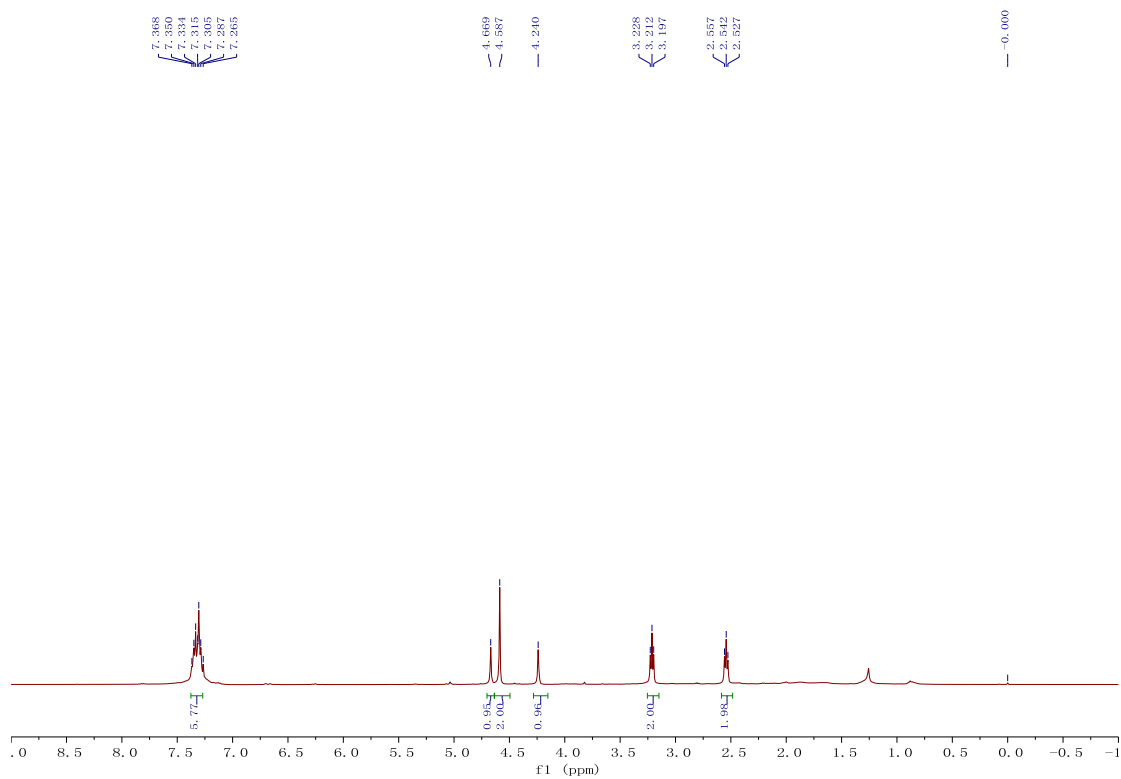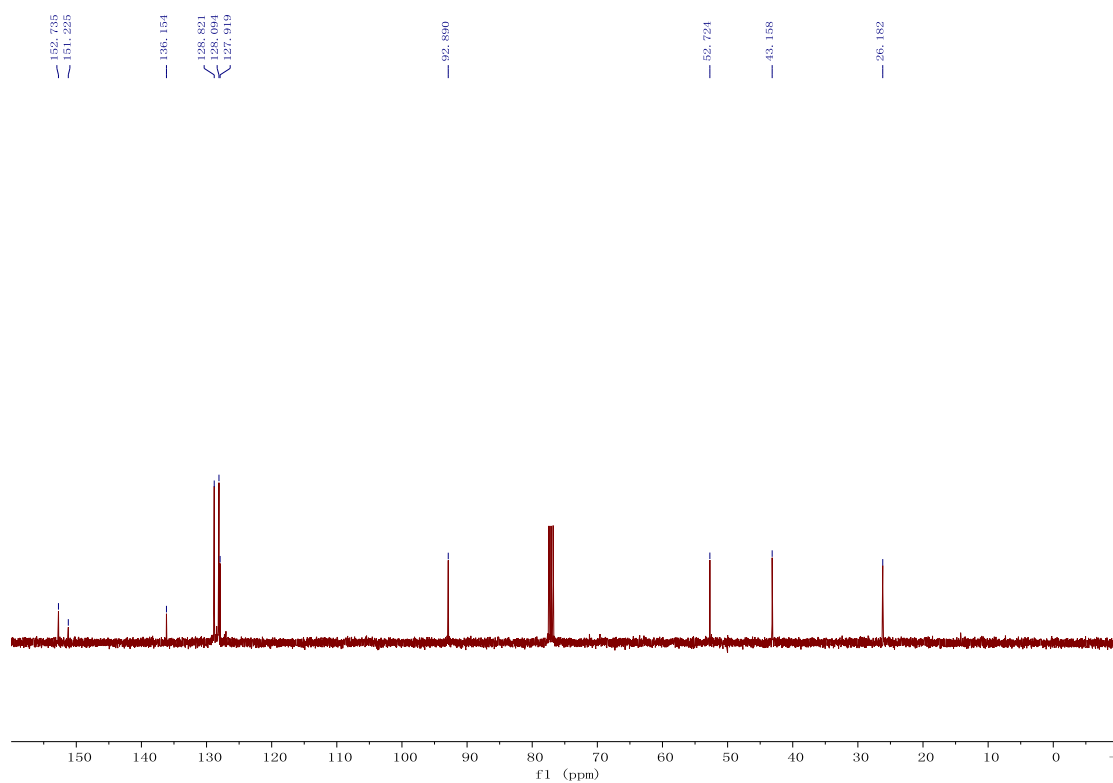



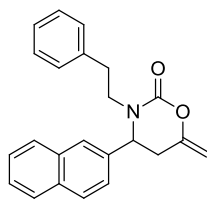

2l

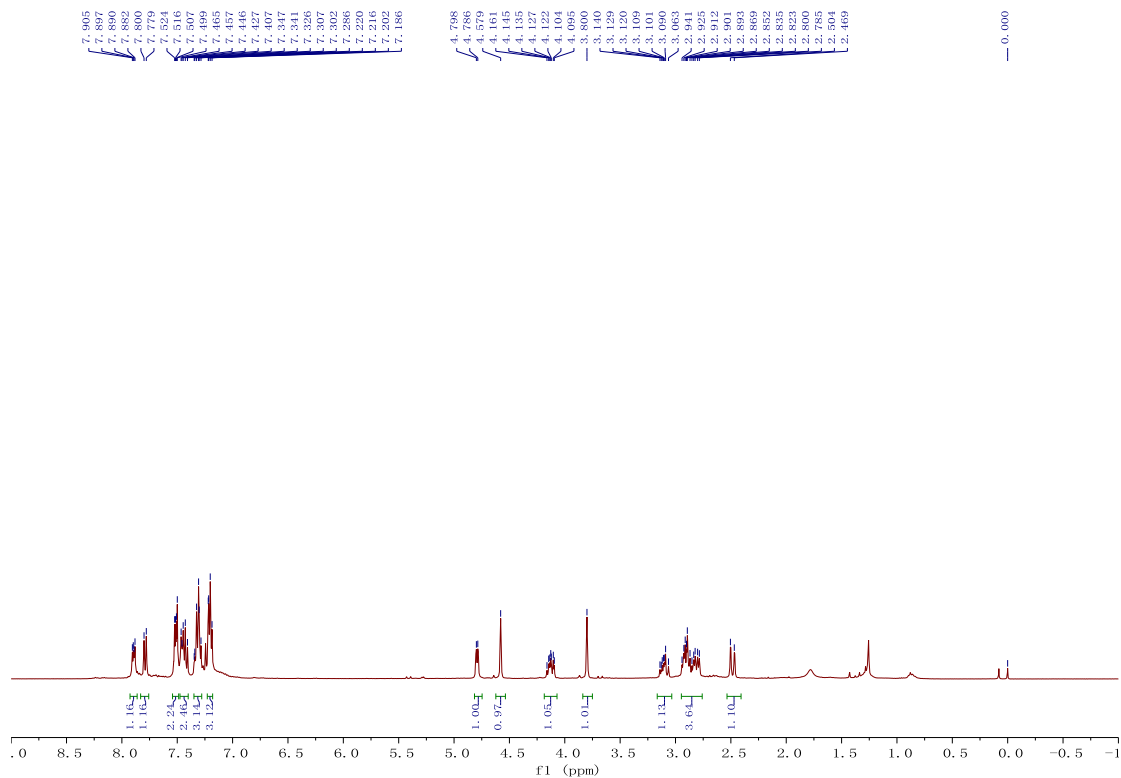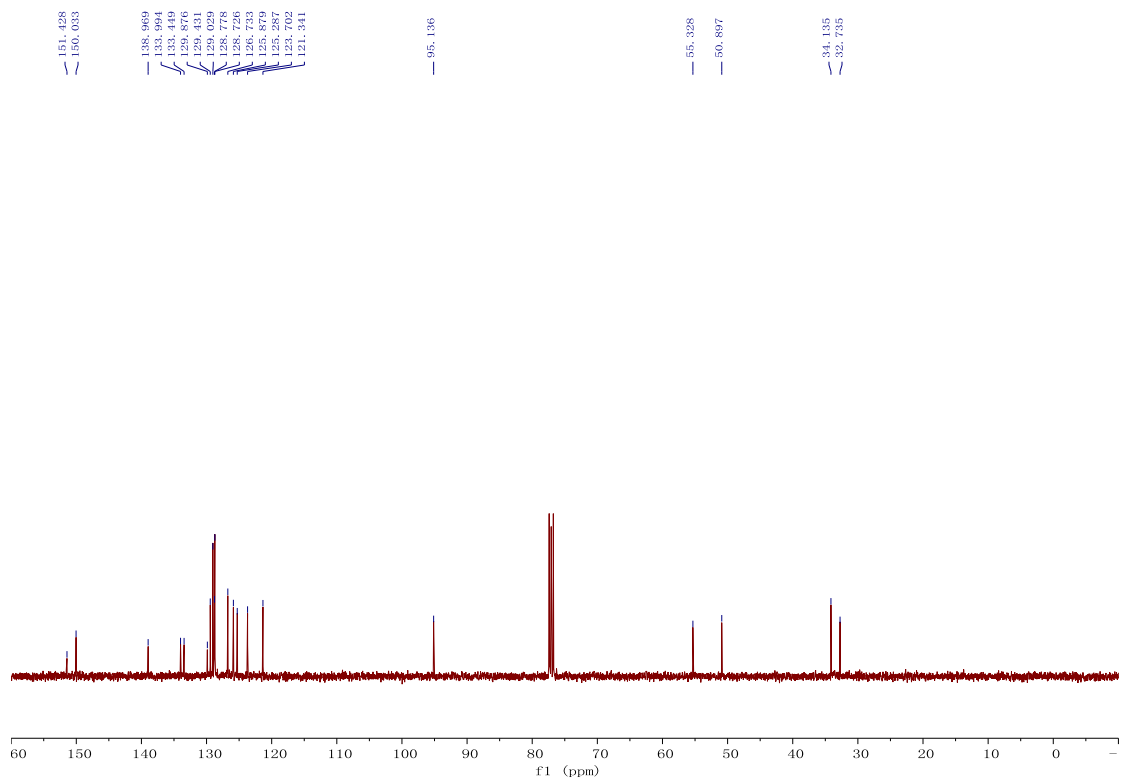

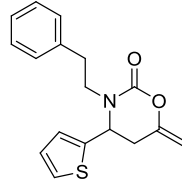

2m

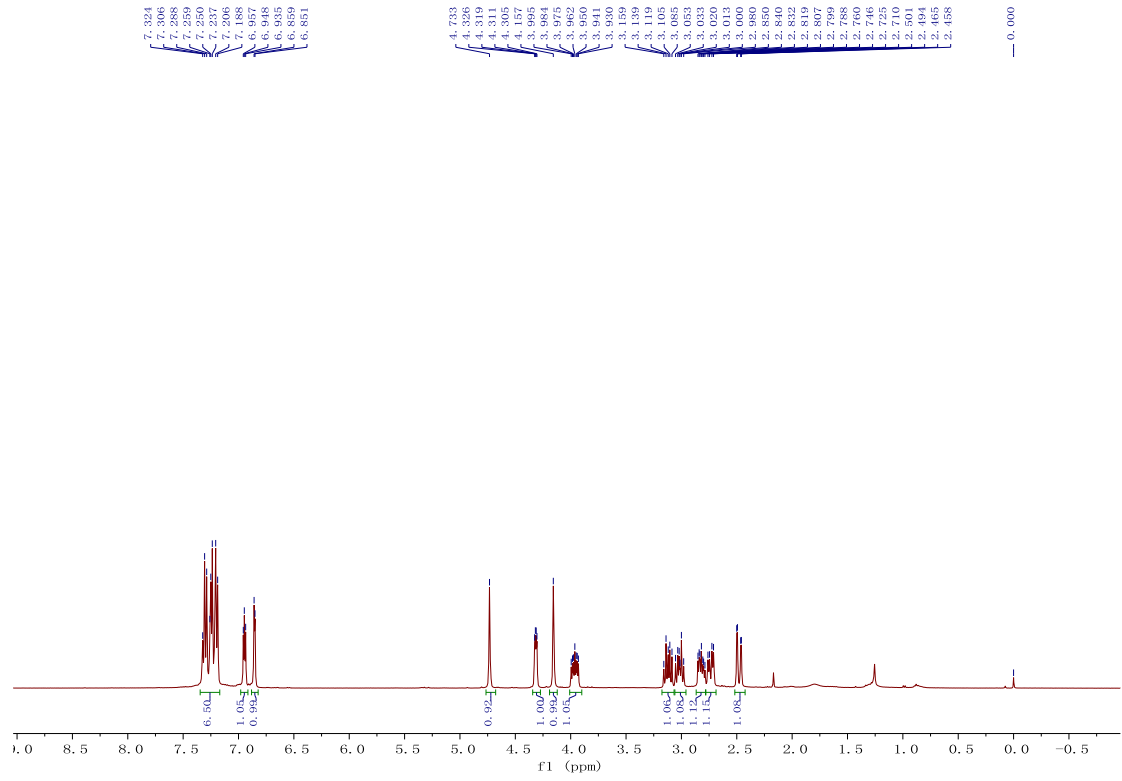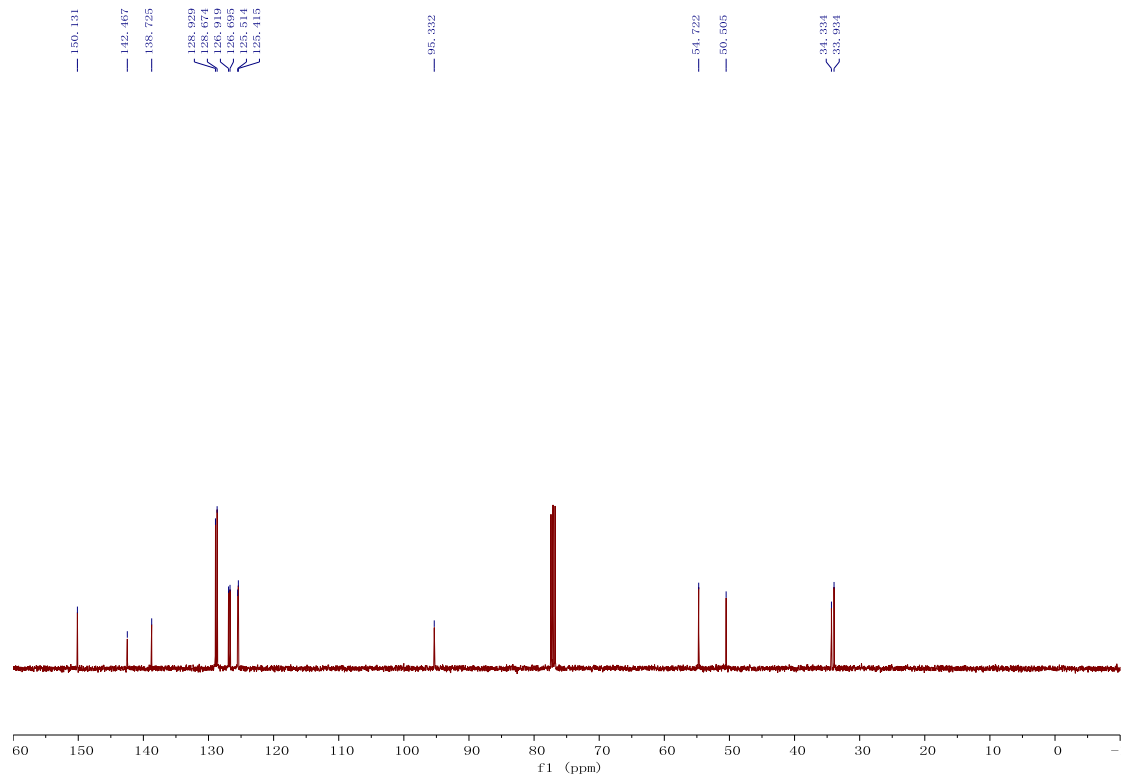

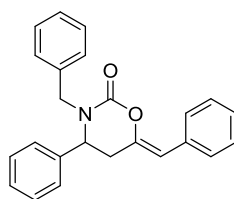

**2n**

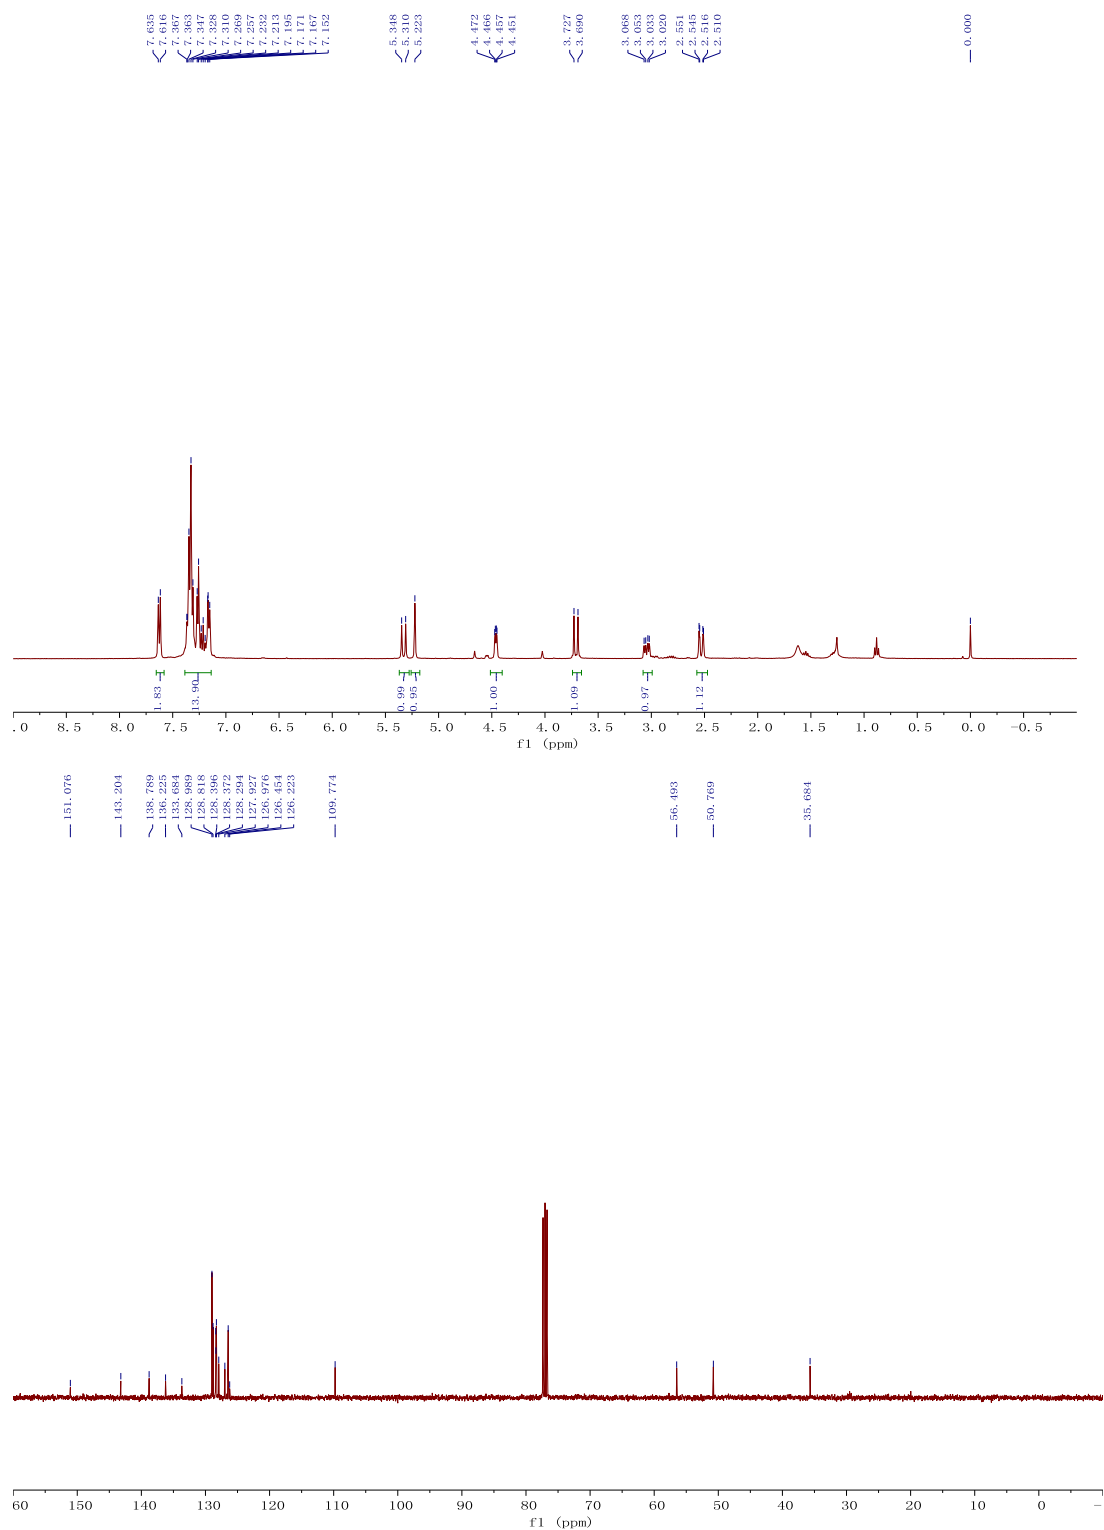

## 9. The spectra of other compounds 3a, 4a, 5a

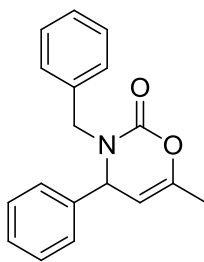

**3a**

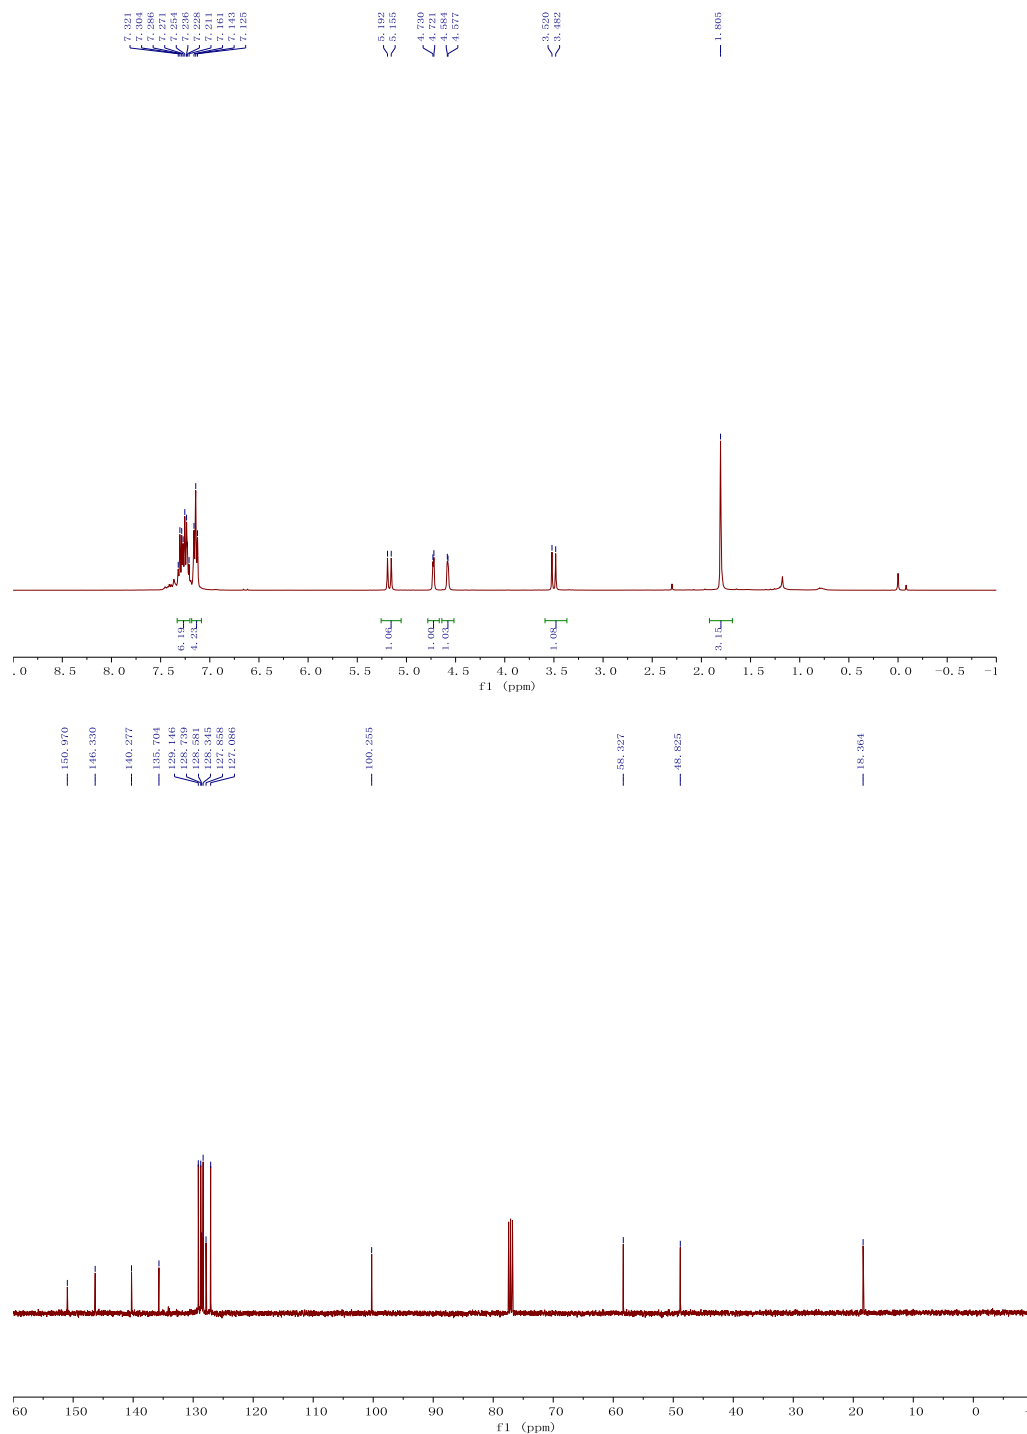

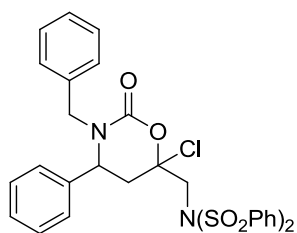

**4a**

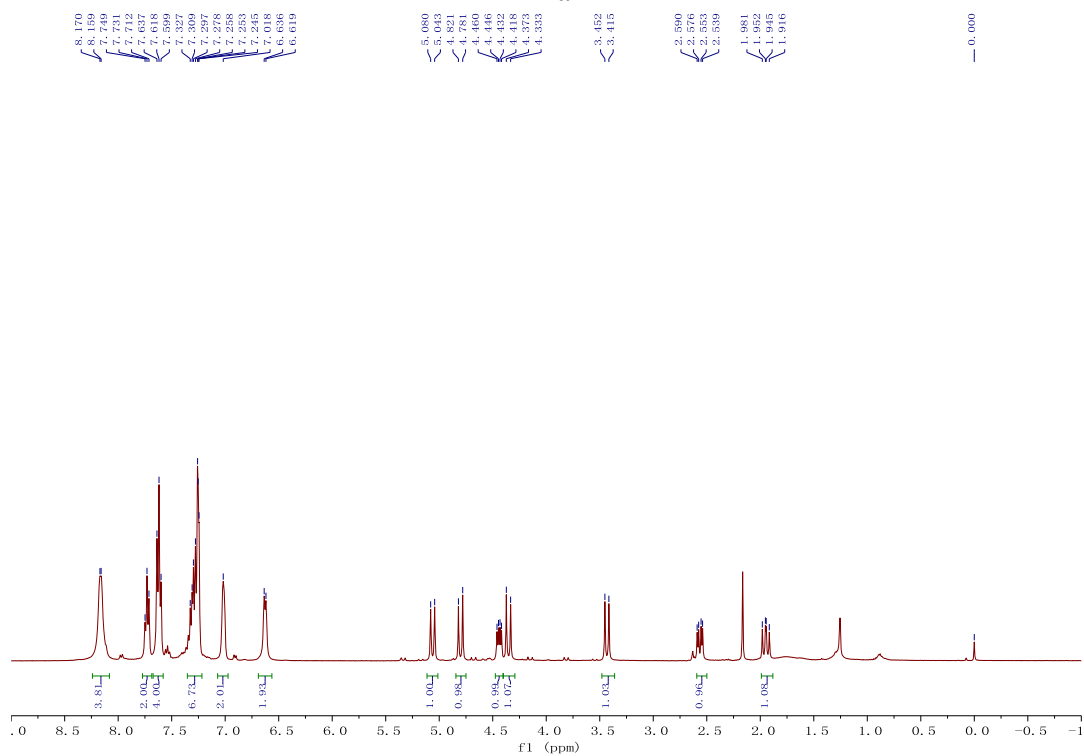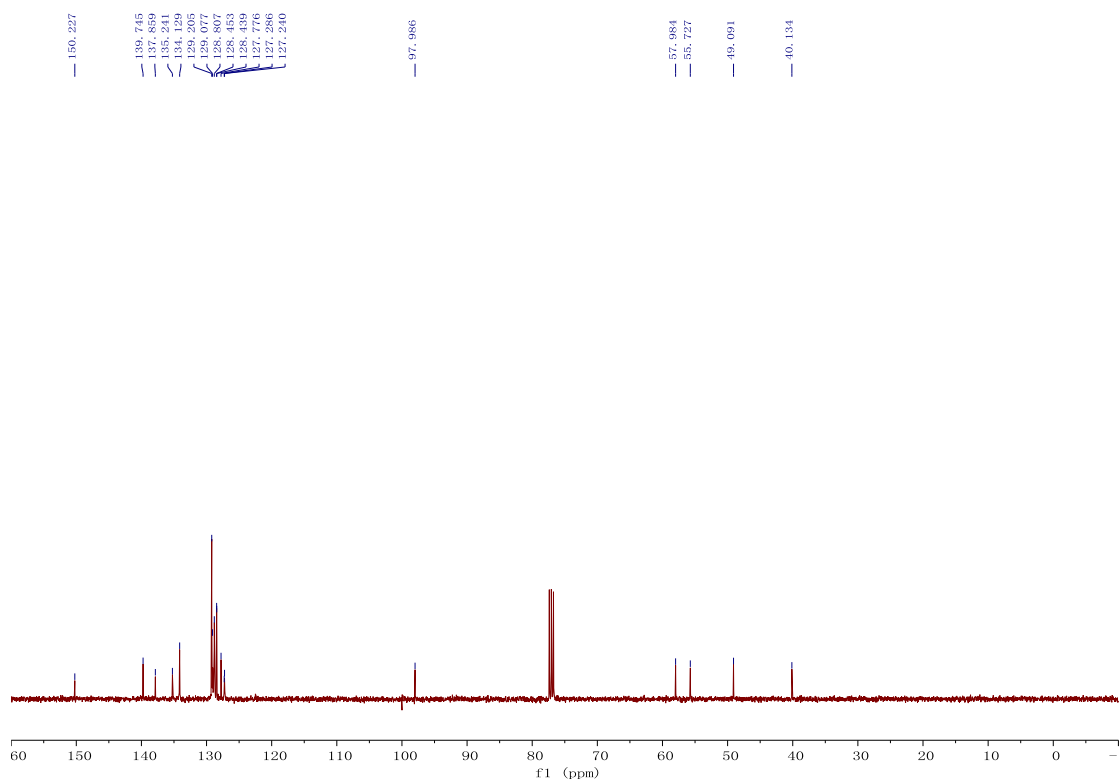

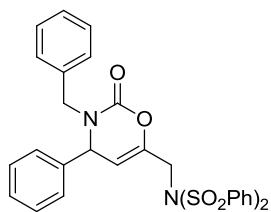

**5a**

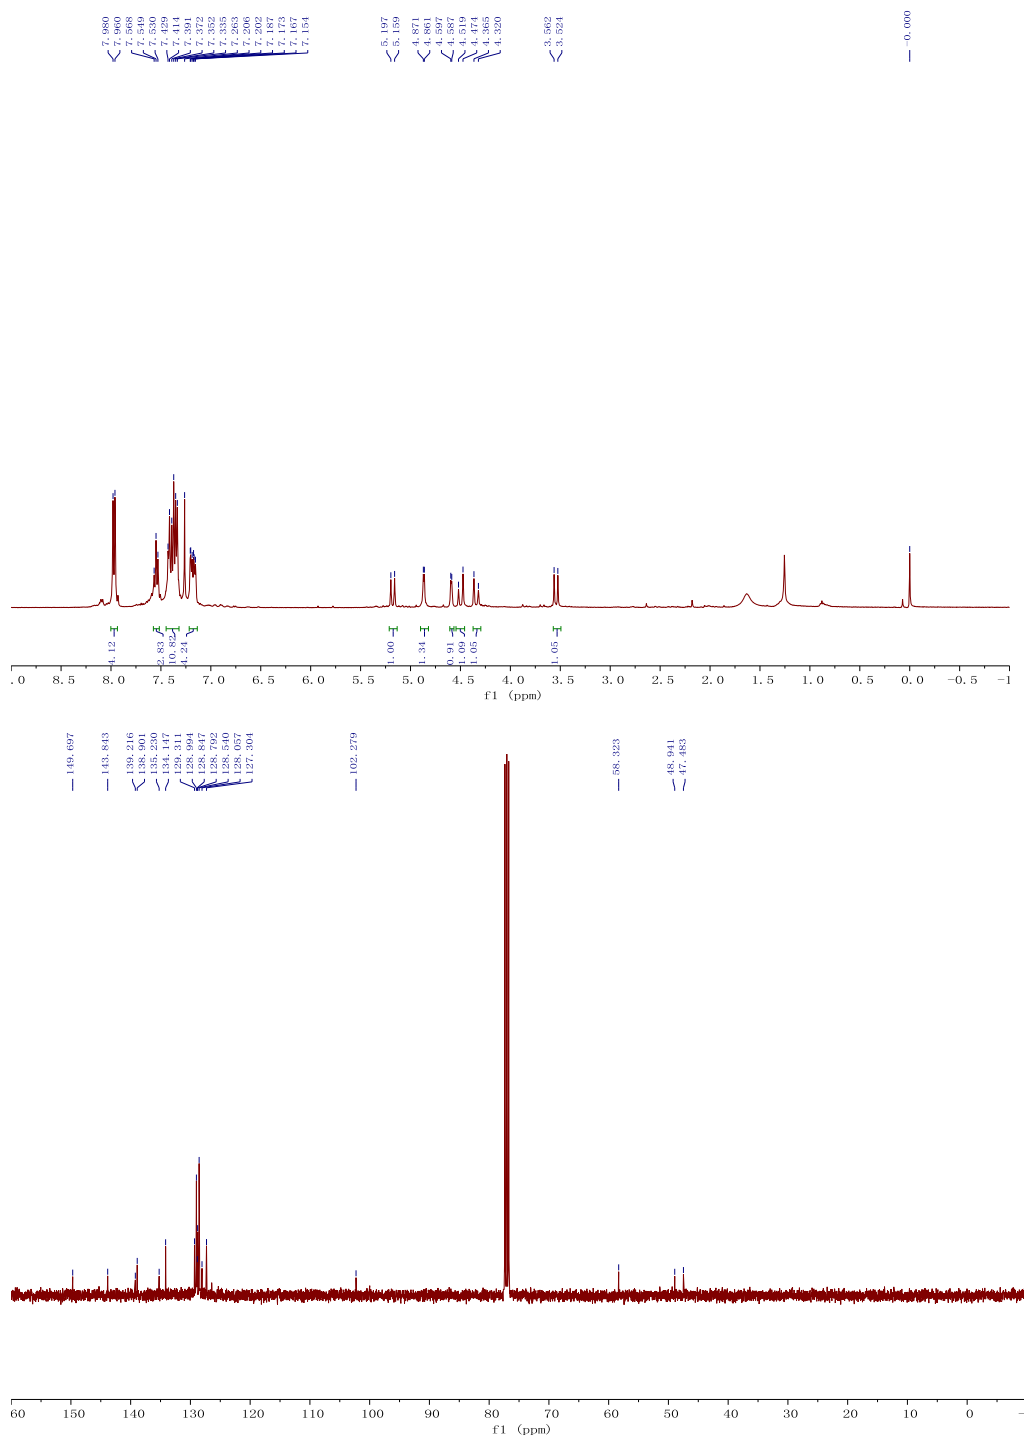

## Reference:

- [1] Brown, H. C.; Khire, U. R.; Narla, G.; Racherla, U. S. *J. Org. Chem.* **1995**, 60, 544.
- [2] Tsukamoto, H.; Kondo, Y. *Angew. Chem. Int. Ed.* **2008**, 47, 4851.
- [3] Van Houten, K. A.; Kim, J. M.; Bogdan, M. A.; Ferri, D. C.; Mariano, P. S. *J. Am. Chem. Soc.* **1998**, 120, 5864.
- [4] Pirali, T.; Tron, G. C.; Masson, G.; Zhu, J. P. *Org. Lett.* **2007**, 9, 5275.
- [5] Huang, K. M.; Ke, X. N.; Wang, H. K.; Wang, J. Y.; Zhou, C. C.; Xu, X. F.; Liu, L. Y.; Li, J. *Org. Biomol. Chem.* **2015**, 13, 4486.
- [6] RoblesMachín, R.; Adrio, J.; Carretero, J. C. *J. Org. Chem.* **2006**, 71, 5023.
- [7] Alcaide, B.; Almendros, P.; Quirós, M.; Fernández, T. I. *Beilstein J. Org. Chem.* **2013**, 9, 818.
- [8] Wang, W. L.; Liu, L. Y.; Chang, W. X.; Li, J. *Chem. Eur. J.* **2018**, 24, 8542.
